# Supplementary material for: Differentiation of cisplatin uptake within a population of cancer cells – how to “crack this nut” using single-cell ICP-MS
Source: Royal Society of Chemistry journal article supplement (doi:10.1039/d5an00152h), 2025-01-01
Supplement: d5an00152h1.xlsx [file d5an00152h1.xlsx]

## Sheet: 1 ppm 24 h
Pt mass [ag]											Pt mass [ag]		Pt mass [ag]
1 mL						2 mL					All samples 1 mL		All samples 2 mL
1ppm 24h 1	1ppm 24h 1_2	1ppm 24h 2	1ppm 24h 2_2	1ppm 24h 3	1ppm 24h 3_2	1ppm 24h 2mL 1	1ppm 24h 2mL 1_2	1ppm 24h 2mL 2	1ppm 24h 2mL 2_2		1115.55		1135.46
21535.4	2052.19	8512.46	18734.9	4447.17	4433.24	29814.6	1135.46	5305.8	4718.1		1074.51		951.678
753.105	1074.51	1671.13	13917.8	1812.09	1800.45	7429.06	951.678	2426.92	2899.68		973.029		845.485
614.204	861.381	1522.03	4924.57	973.029	1660.47	2331.08	770.522	1368.97	2437.31		972.219		771.242
515.925	761.139	1115.55	1323.28	485.102	1207.9	771.242	720.66	845.485	1848.24		861.381		770.522
506.139	721.265	701.747	1229.79	455.837	972.219	612.373	670.994	459.292	1621.92		812.329		720.66
467.074	701.375	662.092	812.329	446.098	790.775	612.373	532.968	410.632	1347.06		790.775		670.994
408.705	671.599	494.95	772.328	426.641	720.911	504.308	474.278	381.527	664.788		772.328		664.788
389.309	563.022	475.433	772.328	416.924	671.245	494.531	454.776	333.171	644.977		772.328		644.977
360.273	513.979	436.49	722.504	387.82	572.5	445.756	377.072	323.522	635.083		761.139		635.083
331.304	465.128	426.773	633.318	358.783	543.028	436.024	348.058	313.881	546.388		753.105		612.373
273.57	445.641	426.773	584.042	339.463	513.625	416.583	328.753	304.248	458.318		722.504		612.373
263.973	435.909	426.773	466.569	300.914	435.556	377.792	319.112	246.603	419.374		721.265		546.388
254.385	435.909	417.064	447.098	291.295	377.324	358.442	299.852	237.021	380.553		720.911		532.968
244.803	416.468	349.312	398.552	281.684	367.645	348.778	290.234	217.881	370.867		701.747		504.308
225.663	348.663	330.022	379.187	272.08	338.654	348.778	280.623	217.881	322.548		701.375		494.531
225.663	339.007	310.762	330.906	272.08	338.654	300.572	280.623	217.881	303.273		671.599		474.278
216.104	339.007	310.762	330.906	272.08	252.085	271.739	261.423	208.322	293.647		671.245		459.292
206.552	329.358	301.144	311.646	214.614	242.504	252.554	261.423	208.322	284.028		662.092		458.318
206.552	319.717	291.532	263.627	214.614	242.504	242.972	261.423	208.322	284.028		633.318		454.776
197.008	290.839	281.929	244.472	205.063	232.93	233.399	261.423	208.322	274.417		614.204		445.756
187.471	290.839	281.929	244.472	205.063	232.93	233.399	261.423	208.322	264.813		584.042		436.024
177.942	281.228	272.332	234.906	195.519	223.364	223.832	251.834	208.322	255.217		572.5		419.374
168.42	262.028	253.162	234.906	185.982	223.364	223.832	251.834	198.77	245.628		563.022		416.583
168.42	262.028	243.588	206.251	185.982	204.253	214.273	242.252	198.77	216.907		543.028		410.632
158.905	262.028	243.588	196.714	176.452	204.253	214.273	232.679	189.226	207.348		515.925		381.527
158.905	252.439	234.022	196.714	176.452	194.709	195.177	223.112	179.689	197.796		513.979		380.553
158.905	252.439	234.022	196.714	176.452	185.172	195.177	223.112	179.689	197.796		513.625		377.792
149.398	252.439	224.463	187.185	176.452	166.12	195.177	213.553	170.16	178.715		506.139		377.072
149.398	242.857	224.463	177.662	166.93	156.606	185.64	213.553	170.16	178.715		494.95		370.867
149.398	233.284	214.911	168.148	157.416	156.606	185.64	204.001	160.638	159.663		485.102		358.442
149.398	233.284	214.911	158.64	157.416	156.606	176.111	194.457	160.638	159.663		475.433		348.778
149.398	223.717	205.367	149.14	157.416	147.098	176.111	184.92	160.638	150.149		467.074		348.778
149.398	223.717	195.83	149.14	147.908	147.098	166.589	184.92	160.638	150.149		466.569		348.058
139.898	214.158	186.301	139.648	147.908	147.098	166.589	184.92	151.123	150.149		465.128		333.171
139.898	204.606	176.779	130.163	138.408	147.098	166.589	184.92	151.123	140.641		455.837		328.753
130.405	204.606	167.264	130.163	138.408	147.098	166.589	184.92	151.123	140.641		447.098		323.522
130.405	195.062	167.264	130.163	138.408	137.598	157.074	184.92	151.123	140.641		446.098		322.548
120.92	185.525	157.757	130.163	128.916	137.598	157.074	184.92	151.123	131.141		445.641		319.112
120.92	185.525	148.257	130.163	128.916	128.106	157.074	175.391	141.616	131.141		436.49		313.881
120.92	185.525	148.257	130.163	128.916	128.106	147.567	165.869	141.616	131.141		435.909		304.248
120.92	166.474	148.257	120.685	128.916	128.106	147.567	165.869	141.616	131.141		435.909		303.273
120.92	166.474	148.257	111.214	128.916	118.62	147.567	165.869	141.616	131.141		435.556		300.572
120.92	166.474	148.257	111.214	128.916	118.62	147.567	165.869	141.616	121.649		426.773		299.852
120.92	156.959	148.257	111.214	128.916	118.62	147.567	146.847	141.616	121.649		426.773		293.647
120.92	156.959	138.764	111.214	128.916	118.62	138.067	146.847	141.616	121.649		426.773		290.234
111.442	147.452	138.764	101.751	119.43	118.62	138.067	146.847	141.616	121.649		426.641		284.028
111.442	147.452	138.764	101.751	119.43	118.62	138.067	137.347	132.116	121.649		417.064		284.028
111.442	147.452	138.764	101.751	119.43	118.62	138.067	137.347	132.116	121.649		416.924		280.623
111.442	147.452	129.279	101.751	119.43	109.143	138.067	137.347	132.116	121.649		416.468		280.623
111.442	147.452	129.279	101.751	119.43	109.143	138.067	137.347	132.116	112.164		408.705		274.417
101.971	147.452	119.801	101.751	119.43	109.143	128.574	137.347	122.623	112.164		398.552		271.739
101.971	147.452	119.801	101.751	109.952	109.143	128.574	137.347	122.623	112.164		389.309		264.813
101.971	137.952	119.801	101.751	109.952	109.143	128.574	127.854	122.623	112.164		387.82		261.423
101.971	137.952	119.801	92.2945	109.952	99.6719	119.089	127.854	122.623	102.686		379.187		261.423
101.971	137.952	119.801	92.2945	109.952	99.6719	119.089	127.854	122.623	102.686		377.324		261.423
101.971	137.952	119.801	92.2945	100.482	99.6719	119.089	127.854	113.138	102.686		367.645		261.423
101.971	137.952	119.801	92.2945	100.482	99.6719	119.089	127.854	113.138	102.686		360.273		261.423
101.971	137.952	110.33	92.2945	100.482	90.2085	109.611	127.854	113.138	102.686		358.783		255.217
101.971	128.459	110.33	92.2945	100.482	90.2085	109.611	127.854	113.138	102.686		349.312		252.554
101.971	128.459	110.33	92.2945	100.482	90.2085	109.611	118.369	113.138	93.2149		348.663		251.834
92.508	128.459	110.33	92.2945	100.482	90.2085	109.611	118.369	113.138	93.2149		339.463		251.834
92.508	128.459	110.33	92.2945	100.482	90.2085	109.611	118.369	113.138	93.2149		339.007		246.603
92.508	128.459	100.867	92.2945	91.0183	90.2085	109.611	118.369	103.66	93.2149		339.007		245.628
92.508	118.974	100.867	92.2945	91.0183	90.2085	100.14	108.891	103.66	93.2149		338.654		242.972
92.508	118.974	100.867	92.2945	91.0183	90.2085	100.14	108.891	103.66	93.2149		338.654		242.252
92.508	118.974	100.867	92.2945	91.0183	90.2085	100.14	108.891	103.66	93.2149		331.304		237.021
92.508	118.974	100.867	82.8458	91.0183	90.2085	100.14	108.891	103.66	93.2149		330.906		233.399
92.508	118.974	100.867	82.8458	91.0183	90.2085	100.14	99.4203	103.66	93.2149		330.906		233.399
92.508	118.974	100.867	82.8458	91.0183	90.2085	100.14	99.4203	103.66	93.2149		330.022		232.679
92.508	118.974	100.867	82.8458	81.5623	80.7525	90.677	99.4203	103.66	93.2149		329.358		223.832
92.508	109.496	91.4109	82.8458	81.5623	80.7525	90.677	99.4203	103.66	93.2149		319.717		223.832
83.0519	109.496	91.4109	82.8458	81.5623	80.7525	90.677	99.4203	103.66	93.2149		311.646		223.112
83.0519	109.496	91.4109	82.8458	81.5623	80.7525	90.677	99.4203	103.66	93.2149		310.762		223.112
83.0519	109.496	91.4109	82.8458	81.5623	80.7525	90.677	99.4203	94.1893	93.2149		310.762		217.881
83.0519	109.496	91.4109	82.8458	81.5623	80.7525	90.677	99.4203	94.1893	93.2149		301.144		217.881
83.0519	109.496	91.4109	82.8458	81.5623	80.7525	90.677	99.4203	94.1893	93.2149		300.914		217.881
83.0519	109.496	91.4109	82.8458	81.5623	80.7525	90.677	99.4203	94.1893	93.2149		291.532		216.907
73.6032	109.496	91.4109	82.8458	81.5623	80.7525	90.677	99.4203	94.1893	93.2149		291.295		214.273
73.6032	109.496	91.4109	82.8458	81.5623	80.7525	86.0937	89.957	94.1893	93.2149		290.839		214.273
73.6032	100.025	91.4109	73.4043	81.5623	80.7525	81.221	89.957	94.1893	93.2149		290.839		213.553
73.6032	100.025	91.4109	73.4043	81.5623	80.7525	81.221	89.957	94.1893	83.7516		281.929		213.553
73.6032	100.025	81.9621	73.4043	81.5623	80.7525	81.221	89.957	84.726	83.7516		281.929		208.322
73.6032	100.025	81.9621	73.4043	81.5623	80.7525	81.221	89.957	84.726	83.7516		281.684		208.322
73.6032	100.025	81.9621	73.4043	81.5623	80.7525	81.221	89.957	84.726	83.7516		281.228		208.322
73.6032	100.025	81.9621	73.4043	81.5623	80.7525	81.221	89.957	84.726	83.7516		273.57		208.322
73.6032	100.025	81.9621	73.4043	81.5623	80.7525	81.221	89.957	84.726	83.7516		272.332		208.322
73.6032	100.025	81.9621	73.4043	81.5623	80.7525	81.221	89.957	84.726	83.7516		272.08		208.322
73.6032	100.025	81.9621	73.4043	81.5623	80.7525	81.221	89.957	84.726	83.7516		272.08		207.348
73.6032	100.025	81.9621	73.4043	72.1136	80.7525	81.221	89.957	84.726	83.7516		272.08		204.001
73.6032	90.562	81.9621	73.4043	72.1136	80.7525	81.221	80.5009	75.2699	83.7516		263.973		198.77
73.6032	90.562	81.9621	73.4043	72.1136	71.3038	81.221	80.5009	75.2699	83.7516		263.627		198.77
73.6032	90.562	81.9621	73.4043	72.1136	71.3038	81.221	80.5009	75.2699	74.2956		262.028		197.796
73.6032	90.562	81.9621	73.4043	72.1136	71.3038	81.221	80.5009	75.2699	74.2956		262.028		197.796
73.6032	90.562	81.9621	73.4043	72.1136	71.3038	71.7722	80.5009	75.2699	74.2956		262.028		195.177
73.6032	90.562	81.9621	73.4043	72.1136	71.3038	71.7722	80.5009	75.2699	74.2956		254.385		195.177
73.6032	90.562	72.5207	73.4043	72.1136	71.3038	71.7722	80.5009	75.2699	74.2956		253.162		195.177
73.6032	90.562	72.5207	73.4043	72.1136	71.3038	71.7722	80.5009	75.2699	74.2956		252.439		194.457
64.1617	90.562	72.5207	73.4043	72.1136	71.3038	71.7722	71.0522	75.2699	74.2956		252.439		189.226
64.1617	90.562	72.5207	73.4043	72.1136	71.3038	71.7722	71.0522	75.2699	74.2956		252.439		185.64
64.1617	90.562	72.5207	73.4043	72.1136	71.3038	71.7722	71.0522	75.2699	74.2956		252.085		185.64
64.1617	90.562	72.5207	73.4043	72.1136	71.3038	71.7722	71.0522	75.2699	74.2956		244.803		184.92
64.1617	90.562	72.5207	73.4043	72.1136	71.3038	71.7722	71.0522	75.2699	74.2956		244.472		184.92
64.1617	90.562	72.5207	73.4043	72.1136	71.3038	71.7722	71.0522	75.2699	74.2956		244.472		184.92
64.1617	90.562	72.5207	73.4043	72.1136	71.3038	71.7722	71.0522	75.2699	74.2956		243.588		184.92
64.1617	90.562	72.5207	63.9702	72.1136	71.3038	71.7722	71.0522	75.2699	74.2956		243.588		184.92
64.1617	90.562	72.5207	63.9702	72.1136	71.3038	71.7722	71.0522	75.2699	74.2956		242.857		184.92
64.1617	81.106	72.5207	63.9702	72.1136	71.3038	71.7722	71.0522	75.2699	74.2956		242.504		184.92
64.1617	81.106	72.5207	63.9702	72.1136	71.3038	71.7722	71.0522	75.2699	74.2956		242.504		179.689
64.1617	81.106	72.5207	63.9702	72.1136	71.3038	71.7722	71.0522	75.2699	74.2956		234.906		179.689
64.1617	81.106	72.5207	63.9702	72.1136	71.3038	71.7722	71.0522	75.2699	74.2956		234.906		178.715
64.1617	81.106	72.5207	63.9702	72.1136	71.3038	71.7722	71.0522	75.2699	74.2956		234.022		178.715
64.1617	81.106	72.5207	63.9702	72.1136	71.3038	71.7722	71.0522	75.2699	74.2956		234.022		176.111
64.1617	81.106	72.5207	63.9702	72.1136	71.3038	71.7722	71.0522	75.2699	74.2956		233.284		176.111
64.1617	81.106	72.5207	63.9702	62.6721	71.3038	71.7722	71.0522	75.2699	74.2956		233.284		175.391
64.1617	81.106	63.0865	63.9702	62.6721	71.3038	71.7722	71.0522	75.2699	74.2956		232.93		170.16
64.1617	81.106	63.0865	63.9702	62.6721	71.3038	62.3308	71.0522	75.2699	64.8468		232.93		170.16
64.1617	81.106	63.0865	63.9702	62.6721	71.3038	62.3308	71.0522	75.2699	64.8468		225.663		166.589
64.1617	81.106	63.0865	63.9702	62.6721	71.3038	62.3308	71.0522	65.8212	64.8468		225.663		166.589
64.1617	81.106	63.0865	63.9702	62.6721	71.3038	62.3308	71.0522	65.8212	64.8468		224.463		166.589
64.1617	81.106	63.0865	63.9702	62.6721	71.3038	62.3308	61.6108	65.8212	64.8468		224.463		166.589
64.1617	81.106	63.0865	63.9702	62.6721	71.3038	62.3308	61.6108	65.8212	64.8468		223.717		165.869
54.7276	81.106	63.0865	63.9702	62.6721	61.8623	62.3308	61.6108	65.8212	64.8468		223.717		165.869
54.7276	81.106	63.0865	63.9702	62.6721	61.8623	62.3308	61.6108	65.8212	64.8468		223.364		165.869
54.7276	81.106	63.0865	63.9702	62.6721	61.8623	62.3308	61.6108	65.8212	64.8468		223.364		165.869
54.7276	81.106	63.0865	63.9702	62.6721	61.8623	62.3308	61.6108	65.8212	64.8468		216.104		160.638
54.7276	81.106	63.0865	63.9702	62.6721	61.8623	62.3308	61.6108	65.8212	64.8468		214.911		160.638
54.7276	81.106	63.0865	63.9702	62.6721	61.8623	62.3308	61.6108	65.8212	64.8468		214.911		160.638
54.7276	81.106	63.0865	63.9702	62.6721	61.8623	62.3308	61.6108	65.8212	64.8468		214.614		160.638
54.7276	71.6572	63.0865	63.9702	62.6721	61.8623	62.3308	61.6108	65.8212	64.8468		214.614		159.663
54.7276	71.6572	63.0865	63.9702	62.6721	61.8623	62.3308	61.6108	65.8212	64.8468		214.158		159.663
54.7276	71.6572	63.0865	63.9702	62.6721	61.8623	62.3308	61.6108	65.8212	64.8468		206.552		157.074
54.7276	71.6572	63.0865	63.9702	62.6721	61.8623	62.3308	61.6108	65.8212	64.8468		206.552		157.074
54.7276	71.6572	63.0865	63.9702	62.6721	61.8623	62.3308	61.6108	65.8212	64.8468		206.251		157.074
54.7276	71.6572	63.0865	63.9702	62.6721	61.8623	62.3308	61.6108	65.8212	64.8468		205.367		151.123
54.7276	71.6572	63.0865	63.9702	62.6721	61.8623	62.3308	61.6108	65.8212	64.8468		205.063		151.123
54.7276	71.6572	63.0865	63.9702	62.6721	61.8623	62.3308	61.6108	65.8212	64.8468		205.063		151.123
54.7276	71.6572	63.0865	63.9702	62.6721	61.8623	62.3308	61.6108	65.8212	64.8468		204.606		151.123
54.7276	71.6572	63.0865	63.9702	62.6721	61.8623	62.3308	61.6108	65.8212	64.8468		204.606		151.123
54.7276	71.6572	63.0865	63.9702	62.6721	61.8623	62.3308	61.6108	65.8212	64.8468		204.253		150.149
54.7276	71.6572	63.0865	63.9702	62.6721	61.8623	62.3308	61.6108	65.8212	64.8468		204.253		150.149
54.7276	71.6572	63.0865	54.5433	62.6721	61.8623	62.3308	61.6108	65.8212	64.8468		197.008		150.149
54.7276	71.6572	63.0865	54.5433	62.6721	61.8623	62.3308	61.6108	65.8212	64.8468		196.714		147.567
54.7276	71.6572	63.0865	54.5433	62.6721	61.8623	62.3308	61.6108	65.8212	64.8468		196.714		147.567
54.7276	71.6572	53.6596	54.5433	62.6721	61.8623	62.3308	61.6108	65.8212	64.8468		196.714		147.567
54.7276	71.6572	53.6596	54.5433	62.6721	61.8623	62.3308	61.6108	65.8212	64.8468		195.83		147.567
54.7276	71.6572	53.6596	54.5433	53.2379	61.8623	62.3308	61.6108	65.8212	64.8468		195.519		147.567
54.7276	71.6572	53.6596	54.5433	53.2379	61.8623	62.3308	61.6108	65.8212	64.8468		195.062		146.847
54.7276	71.6572	53.6596	54.5433	53.2379	61.8623	62.3308	61.6108	65.8212	64.8468		194.709		146.847
54.7276	71.6572	53.6596	54.5433	53.2379	61.8623	62.3308	61.6108	56.3798	64.8468		187.471		146.847
54.7276	71.6572	53.6596	54.5433	53.2379	61.8623	62.3308	61.6108	56.3798	64.8468		187.185		141.616
54.7276	71.6572	53.6596	54.5433	53.2379	61.8623	62.3308	61.6108	56.3798	64.8468		186.301		141.616
54.7276	71.6572	53.6596	54.5433	53.2379	61.8623	62.3308	61.6108	56.3798	64.8468		185.982		141.616
54.7276	71.6572	53.6596	54.5433	53.2379	61.8623	62.3308	61.6108	56.3798	64.8468		185.982		141.616
54.7276	71.6572	53.6596	54.5433	53.2379	61.8623	62.3308	52.1766	56.3798	64.8468		185.525		141.616
54.7276	71.6572	53.6596	54.5433	53.2379	61.8623	62.3308	52.1766	56.3798	64.8468		185.525		141.616
54.7276	71.6572	53.6596	54.5433	53.2379	61.8623	62.3308	52.1766	56.3798	64.8468		185.525		141.616
54.7276	71.6572	53.6596	54.5433	53.2379	61.8623	62.3308	52.1766	56.3798	64.8468		185.172		141.616
54.7276	71.6572	53.6596	54.5433	53.2379	61.8623	59.1317	52.1766	56.3798	64.8468		177.942		140.641
54.7276	71.6572	53.6596	54.5433	53.2379	61.8623	52.8966	52.1766	56.3798	64.8468		177.662		140.641
54.7276	71.6572	53.6596	54.5433	53.2379	61.8623	52.8966	52.1766	56.3798	55.4054		176.779		140.641
54.7276	71.6572	53.6596	54.5433	53.2379	61.8623	52.8966	52.1766	56.3798	55.4054		176.452		138.067
54.7276	62.2158	53.6596	54.5433	53.2379	61.8623	52.8966	52.1766	56.3798	55.4054		176.452		138.067
54.7276	62.2158	53.6596	54.5433	53.2379	61.8623	52.8966	52.1766	56.3798	55.4054		176.452		138.067
54.7276	62.2158	53.6596	54.5433	53.2379	61.8623	52.8966	52.1766	56.3798	55.4054		176.452		138.067
54.7276	62.2158	53.6596	54.5433	53.2379	61.8623	52.8966	52.1766	56.3798	55.4054		168.42		138.067
45.3006	62.2158	53.6596	54.5433	53.2379	61.8623	52.8966	52.1766	56.3798	55.4054		168.42		138.067
45.3006	62.2158	53.6596	54.5433	53.2379	61.8623	52.8966	52.1766	56.3798	55.4054		168.148		137.347
45.3006	62.2158	53.6596	54.5433	53.2379	61.8623	52.8966	52.1766	56.3798	55.4054		167.264		137.347
45.3006	62.2158	53.6596	54.5433	53.2379	61.8623	52.8966	52.1766	56.3798	55.4054		167.264		137.347
45.3006	62.2158	53.6596	54.5433	53.2379	52.4281	52.8966	52.1766	56.3798	55.4054		166.93		137.347
45.3006	62.2158	53.6596	54.5433	53.2379	52.4281	52.8966	52.1766	56.3798	55.4054		166.474		137.347
45.3006	62.2158	53.6596	54.5433	53.2379	52.4281	52.8966	52.1766	56.3798	55.4054		166.474		137.347
45.3006	62.2158	53.6596	54.5433	53.2379	52.4281	52.8966	52.1766	56.3798	55.4054		166.474		132.116
45.3006	62.2158	53.6596	54.5433	53.2379	52.4281	52.8966	52.1766	56.3798	55.4054		166.12		132.116
45.3006	62.2158	53.6596	54.5433	53.2379	52.4281	52.8966	52.1766	56.3798	55.4054		158.905		132.116
45.3006	62.2158	53.6596	54.5433	53.2379	52.4281	52.8966	52.1766	56.3798	55.4054		158.905		132.116
45.3006	62.2158	53.6596	54.5433	53.2379	52.4281	52.8966	52.1766	56.3798	55.4054		158.905		131.141
45.3006	62.2158	53.6596	54.5433	53.2379	52.4281	52.8966	52.1766	56.3798	55.4054		158.64		131.141
45.3006	62.2158	53.6596	54.5433	53.2379	52.4281	52.8966	52.1766	56.3798	55.4054		157.757		131.141
45.3006	62.2158	53.6596	54.5433	53.2379	52.4281	52.8966	52.1766	56.3798	55.4054		157.416		131.141
45.3006	62.2158	53.6596	54.5433	53.2379	52.4281	52.8966	52.1766	56.3798	55.4054		157.416		131.141
45.3006	62.2158	53.6596	54.5433	53.2379	52.4281	52.8966	52.1766	56.3798	55.4054		157.416		128.574
45.3006	62.2158	53.6596	54.5433	53.2379	52.4281	52.8966	52.1766	56.3798	55.4054		156.959		128.574
45.3006	62.2158	53.6596	54.5433	53.2379	52.4281	52.8966	52.1766	56.3798	55.4054		156.959		128.574
45.3006	62.2158	53.6596	54.5433	53.2379	52.4281	52.8966	52.1766	56.3798	55.4054		156.606		127.854
45.3006	62.2158	53.6596	54.5433	53.2379	52.4281	52.8966	52.1766	56.3798	55.4054		156.606		127.854
45.3006	62.2158	53.6596	54.5433	53.2379	52.4281	52.8966	52.1766	56.3798	55.4054		156.606		127.854
45.3006	62.2158	53.6596	53.354	53.2379	52.4281	52.8966	52.1766	56.3798	55.4054		149.398		127.854
45.3006	62.2158	53.6596	46.6135	53.2379	52.4281	52.8966	52.1766	56.3798	55.4054		149.398		127.854
45.3006	62.2158	53.6596	45.1236	53.2379	52.4281	52.8966	52.1766	56.3798	55.4054		149.398		127.854
45.3006	62.2158	53.6596	45.1236	53.2379	52.4281	52.8966	52.1766	56.3798	55.4054		149.398		127.854
45.3006	62.2158	53.6596	45.1236	53.2379	52.4281	52.8966	52.1766	56.3798	55.4054		149.398		122.623
45.3006	62.2158	53.6596	45.1236	53.2379	52.4281	52.8966	52.1766	56.3798	55.4054		149.398		122.623
45.3006	62.2158	53.6596	45.1236	53.2379	52.4281	52.8966	52.1766	56.3798	55.4054		149.14		122.623
45.3006	62.2158	53.6596	45.1236	53.2379	52.4281	52.8966	52.1766	56.3798	55.4054		149.14		122.623
45.3006	62.2158	53.6596	45.1236	53.2379	52.4281	52.8966	52.1766	56.3798	55.4054		148.257		122.623
45.3006	62.2158	53.6596	45.1236	53.2379	52.4281	52.8966	52.1766	56.3798	55.4054		148.257		121.649
45.3006	62.2158	53.6596	45.1236	53.2379	52.4281	52.8966	52.1766	56.3798	55.4054		148.257		121.649
45.3006	62.2158	53.6596	45.1236	53.2379	52.4281	52.8966	52.1766	56.3798	55.4054		148.257		121.649
45.3006	62.2158	53.6596	45.1236	53.2379	52.4281	52.8966	52.1766	56.3798	55.4054		148.257		121.649
45.3006	62.2158	53.6596	45.1236	53.2379	52.4281	52.8966	52.1766	56.3798	55.4054		148.257		121.649
45.3006	62.2158	53.6596	45.1236	53.2379	52.4281	52.8966	52.1766	56.3798	55.4054		147.908		121.649
45.3006	62.2158	53.6596	45.1236	53.2379	52.4281	52.8966	52.1766	56.3798	55.4054		147.908		121.649
45.3006	62.2158	53.6596	45.1236	53.2379	52.4281	52.8966	52.1766	56.3798	55.4054		147.452		119.089
45.3006	62.2158	53.6596	45.1236	53.2379	52.4281	52.8966	52.1766	56.3798	55.4054		147.452		119.089
45.3006	62.2158	53.6596	45.1236	53.2379	52.4281	52.8966	52.1766	56.3798	55.4054		147.452		119.089
45.3006	62.2158	53.6596	45.1236	43.811	52.4281	52.8966	52.1766	56.3798	55.4054		147.452		119.089
45.3006	62.2158	53.6596	45.1236	43.811	52.4281	52.8966	52.1766	46.9456	55.4054		147.452		118.369
45.3006	62.2158	53.6596	45.1236	43.811	52.4281	52.8966	52.1766	46.9456	55.4054		147.452		118.369
45.3006	62.2158	44.2399	45.1236	43.811	52.4281	52.8966	52.1766	46.9456	55.4054		147.452		118.369
45.3006	62.2158	44.2399	45.1236	43.811	52.4281	52.8966	52.1766	46.9456	55.4054		147.098		118.369
45.3006	62.2158	44.2399	45.1236	43.811	52.4281	52.8966	52.1766	46.9456	55.4054		147.098		113.138
45.3006	62.2158	44.2399	45.1236	43.811	52.4281	52.8966	52.1766	46.9456	55.4054		147.098		113.138
45.3006	62.2158	44.2399	45.1236	43.811	52.4281	52.8966	52.1766	46.9456	55.4054		147.098		113.138
45.3006	62.2158	44.2399	45.1236	43.811	52.4281	52.8966	52.1766	46.9456	55.4054		147.098		113.138
45.3006	62.2158	44.2399	45.1236	43.811	52.4281	52.8966	52.1766	46.9456	55.4054		139.898		113.138
45.3006	62.2158	44.2399	45.1236	43.811	52.4281	52.8966	52.1766	46.9456	55.4054		139.898		113.138
45.3006	62.2158	44.2399	45.1236	43.811	52.4281	52.8966	52.1766	46.9456	55.4054		139.648		113.138
45.3006	52.7816	44.2399	45.1236	43.811	52.4281	52.8966	52.1766	46.9456	55.4054		138.764		112.164
45.3006	52.7816	44.2399	45.1236	43.811	52.4281	52.8966	52.1766	46.9456	55.4054		138.764		112.164
45.3006	52.7816	44.2399	45.1236	43.811	52.4281	52.8966	52.1766	46.9456	55.4054		138.764		112.164
45.3006	52.7816	44.2399	45.1236	43.811	52.4281	52.8966	52.1766	46.9456	55.4054		138.764		112.164
45.3006	52.7816	44.2399	45.1236	43.811	52.4281	52.8966	42.7497	46.9456	55.4054		138.408		109.611
45.3006	52.7816	44.2399	45.1236	43.811	52.4281	52.3912	42.7497	46.9456	55.4054		138.408		109.611
45.3006	52.7816	44.2399	45.1236	43.811	52.4281	43.4697	42.7497	46.9456	55.4054		138.408		109.611
45.3006	52.7816	44.2399	45.1236	43.811	52.4281	43.4697	42.7497	46.9456	55.4054		137.952		109.611
45.3006	52.7816	44.2399	45.1236	43.811	52.4281	43.4697	42.7497	46.9456	55.4054		137.952		109.611
45.3006	52.7816	44.2399	45.1236	43.811	52.4281	43.4697	42.7497	46.9456	55.4054		137.952		109.611
45.3006	52.7816	44.2399	45.1236	43.811	52.4281	43.4697	42.7497	46.9456	55.4054		137.952		108.891
45.3006	52.7816	44.2399	45.1236	43.811	52.4281	43.4697	42.7497	46.9456	55.4054		137.952		108.891
45.3006	52.7816	44.2399	45.1236	43.811	52.4281	43.4697	42.7497	46.9456	55.4054		137.952		108.891
45.3006	52.7816	44.2399	45.1236	43.811	52.4281	43.4697	42.7497	46.9456	55.4054		137.598		108.891
45.3006	52.7816	44.2399	45.1236	43.811	52.4281	43.4697	42.7497	46.9456	55.4054		137.598		103.66
45.3006	52.7816	44.2399	45.1236	43.811	52.4281	43.4697	42.7497	46.9456	55.4054		130.405		103.66
45.3006	52.7816	44.2399	45.1236	43.811	52.4281	43.4697	42.7497	46.9456	55.4054		130.405		103.66
45.3006	52.7816	44.2399	45.1236	43.811	52.4281	43.4697	42.7497	46.9456	55.4054		130.163		103.66
45.3006	52.7816	44.2399	45.1236	43.811	52.4281	43.4697	42.7497	46.9456	55.4054		130.163		103.66
45.3006	52.7816	44.2399	45.1236	43.811	52.4281	43.4697	42.7497	46.9456	45.9712		130.163		103.66
45.3006	52.7816	44.2399	45.1236	43.811	52.4281	43.4697	42.7497	46.9456	45.9712		130.163		103.66
45.3006	52.7816	44.2399	45.1236	43.811	52.4281	43.4697	42.7497	46.9456	45.9712		130.163		103.66
45.3006	52.7816	44.2399	45.1236	43.811	52.4281	43.4697	42.7497	46.9456	45.9712		130.163		103.66
45.3006	52.7816	44.2399	45.1236	43.811	52.4281	43.4697	42.7497	46.9456	45.9712		129.279		103.66
45.3006	52.7816	44.2399	45.1236	43.811	52.4281	43.4697	42.7497	46.9456	45.9712		129.279		103.66
45.3006	52.7816	44.2399	45.1236	43.811	52.4281	43.4697	42.7497	46.9456	45.9712		128.916		102.686
45.3006	52.7816	44.2399	45.1236	43.811	52.4281	43.4697	42.7497	46.9456	45.9712		128.916		102.686
45.3006	52.7816	44.2399	45.1236	43.811	52.4281	43.4697	42.7497	46.9456	45.9712		128.916		102.686
45.3006	52.7816	44.2399	45.1236	43.811	52.4281	43.4697	42.7497	46.9456	45.9712		128.916		102.686
45.3006	52.7816	44.2399	45.1236	43.811	52.4281	43.4697	42.7497	46.9456	45.9712		128.916		102.686
45.3006	52.7816	44.2399	45.1236	43.811	52.4281	43.4697	42.7497	46.9456	45.9712		128.916		102.686
45.3006	52.7816	44.2399	45.1236	43.811	52.4281	43.4697	42.7497	46.9456	45.9712		128.916		100.14
45.3006	52.7816	44.2399	45.1236	43.811	52.4281	43.4697	42.7497	46.9456	45.9712		128.916		100.14
45.3006	52.7816	44.2399	45.1236	43.811	52.4281	43.4697	42.7497	46.9456	45.9712		128.459		100.14
45.3006	52.7816	44.2399	45.1236	43.811	52.4281	43.4697	42.7497	46.9456	45.9712		128.459		100.14
45.3006	52.7816	44.2399	45.1236	43.811	52.4281	43.4697	42.7497	46.9456	45.9712		128.459		100.14
45.3006	52.7816	44.2399	45.1236	43.811	52.4281	43.4697	42.7497	46.9456	45.9712		128.459		100.14
45.3006	52.7816	44.2399	45.1236	43.811	52.4281	43.4697	42.7497	46.9456	45.9712		128.459		99.4203
45.3006	52.7816	44.2399	45.1236	43.811	52.4281	43.4697	42.7497	46.9456	45.9712		128.106		99.4203
45.3006	52.7816	44.2399	45.1236	43.811	52.4281	43.4697	42.7497	46.9456	45.9712		128.106		99.4203
45.3006	52.7816	44.2399	45.1236	43.811	52.4281	43.4697	42.7497	46.9456	45.9712		128.106		99.4203
45.3006	52.7816	44.2399	45.1236	43.811	52.4281	43.4697	42.7497	46.9456	45.9712		120.92		99.4203
35.881	52.7816	44.2399	45.1236	43.811	52.4281	43.4697	42.7497	46.9456	45.9712		120.92		99.4203
35.881	52.7816	44.2399	45.1236	43.811	52.4281	43.4697	42.7497	46.9456	45.9712		120.92		99.4203
35.881	52.7816	44.2399	45.1236	43.811	52.4281	43.4697	42.7497	46.9456	45.9712		120.92		99.4203
35.881	52.7816	44.2399	45.1236	43.811	52.4281	43.4697	42.7497	46.9456	45.9712		120.92		99.4203
35.881	52.7816	44.2399	45.1236	43.811	52.4281	43.4697	42.7497	46.9456	45.9712		120.92		99.4203
35.881	52.7816	44.2399	45.1236	43.811	52.4281	43.4697	42.7497	46.9456	45.9712		120.92		99.4203
35.881	52.7816	44.2399	45.1236	43.811	52.4281	43.4697	42.7497	46.9456	45.9712		120.92		94.1893
35.881	52.7816	44.2399	45.1236	43.811	43.0012	43.4697	42.7497	46.9456	45.9712		120.685		94.1893
35.881	52.7816	44.2399	45.1236	43.811	43.0012	43.4697	42.7497	46.9456	45.9712		119.801		94.1893
35.881	52.7816	44.2399	45.1236	43.811	43.0012	43.4697	42.7497	46.9456	45.9712		119.801		94.1893
35.881	52.7816	44.2399	45.1236	43.811	43.0012	43.4697	42.7497	46.9456	45.9712		119.801		94.1893
35.881	52.7816	44.2399	45.1236	43.811	43.0012	43.4697	42.7497	46.9456	45.9712		119.801		94.1893
35.881	52.7816	44.2399	45.1236	43.811	43.0012	43.4697	42.7497	46.9456	45.9712		119.801		94.1893
35.881	52.7816	44.2399	45.1236	43.811	43.0012	43.4697	42.7497	46.9456	45.9712		119.801		94.1893
35.881	52.7816	44.2399	45.1236	43.811	43.0012	43.4697	42.7497	46.9456	45.9712		119.801		93.2149
35.881	52.7816	44.2399	45.1236	43.811	43.0012	43.4697	42.7497	46.9456	45.9712		119.43		93.2149
35.881	52.7816	44.2399	45.1236	43.811	43.0012	43.4697	42.7497	46.9456	45.9712		119.43		93.2149
35.881	52.7816	44.2399	45.1236	43.811	43.0012	43.4697	42.7497	46.9456	45.9712		119.43		93.2149
35.881	52.7816	44.2399	45.1236	43.811	43.0012	43.4697	42.7497	46.9456	45.9712		119.43		93.2149
35.881	52.7816	44.2399	45.1236	43.811	43.0012	43.4697	42.7497	46.9456	45.9712		119.43		93.2149
35.881	52.7816	44.2399	45.1236	43.811	43.0012	43.4697	42.7497	46.9456	45.9712		119.43		93.2149
35.881	52.7816	44.2399	45.1236	43.811	43.0012	43.4697	42.7497	46.9456	45.9712		118.974		93.2149
35.881	52.7816	44.2399	45.1236	43.811	43.0012	43.4697	42.7497	46.9456	45.9712		118.974		93.2149
35.881	52.7816	44.2399	45.1236	43.811	43.0012	43.4697	42.7497	46.9456	45.9712		118.974		93.2149
35.881	52.7816	44.2399	45.1236	43.811	43.0012	43.4697	42.7497	46.9456	45.9712		118.974		93.2149
35.881	52.7816	44.2399	45.1236	43.811	43.0012	43.4697	42.7497	46.9456	45.9712		118.974		93.2149
35.881	52.7816	44.2399	45.1236	43.811	43.0012	43.4697	42.7497	46.9456	45.9712		118.974		93.2149
35.881	52.7816	44.2399	45.1236	43.811	43.0012	43.4697	42.7497	46.9456	45.9712		118.974		93.2149
35.881	52.7816	44.2399	45.1236	43.811	43.0012	43.4697	42.7497	46.9456	45.9712		118.62		93.2149
35.881	52.7816	44.2399	45.1236	43.811	43.0012	43.4697	42.7497	46.9456	45.9712		118.62		93.2149
35.881	52.7816	44.2399	45.1236	43.811	43.0012	43.4697	42.7497	46.9456	45.9712		118.62		93.2149
35.881	52.7816	44.2399	45.1236	43.811	43.0012	43.4697	42.7497	46.9456	45.9712		118.62		93.2149
35.881	52.7816	44.2399	45.1236	43.811	43.0012	43.4697	42.7497	46.9456	45.9712		118.62		93.2149
35.881	52.7816	44.2399	45.1236	43.811	43.0012	43.4697	42.7497	46.9456	45.9712		118.62		93.2149
35.881	52.7816	44.2399	45.1236	43.811	43.0012	43.4697	42.7497	46.9456	45.9712		118.62		93.2149
35.881	52.7816	44.2399	45.1236	43.811	43.0012	43.4697	42.7497	46.9456	45.9712		111.442		90.677
35.881	52.7816	44.2399	45.1236	43.811	43.0012	43.4697	42.7497	46.9456	45.9712		111.442		90.677
35.881	52.7816	44.2399	45.1236	43.811	43.0012	43.4697	42.7497	46.9456	45.9712		111.442		90.677
35.881	52.7816	44.2399	45.1236	43.811	43.0012	43.4697	42.7497	46.9456	45.9712		111.442		90.677
35.881	52.7816	44.2399	45.1236	43.811	43.0012	43.4697	42.7497	46.9456	45.9712		111.442		90.677
35.881	52.7816	44.2399	45.1236	43.811	43.0012	43.4697	42.7497	46.9456	45.9712		111.214		90.677
35.881	52.7816	44.2399	45.1236	43.811	43.0012	43.4697	42.7497	46.9456	45.9712		111.214		90.677
35.881	52.7816	44.2399	45.1236	43.811	43.0012	43.4697	42.7497	46.9456	45.9712		111.214		90.677
35.881	43.3547	44.2399	45.1236	43.811	43.0012	43.4697	42.7497	46.9456	45.9712		111.214		90.677
35.881	43.3547	44.2399	45.1236	43.811	43.0012	43.4697	42.7497	46.9456	45.9712		110.33		89.957
35.881	43.3547	44.2399	45.1236	43.811	43.0012	43.4697	42.7497	46.9456	45.9712		110.33		89.957
35.881	43.3547	44.2399	45.1236	43.811	43.0012	43.4697	42.7497	46.9456	45.9712		110.33		89.957
35.881	43.3547	44.2399	45.1236	43.811	43.0012	43.4697	42.7497	46.9456	45.9712		110.33		89.957
35.881	43.3547	44.2399	45.1236	43.811	43.0012	43.4697	42.7497	46.9456	45.9712		110.33		89.957
35.881	43.3547	44.2399	45.1236	43.811	43.0012	43.4697	42.7497	46.9456	45.9712		109.952		89.957
35.881	43.3547	44.2399	45.1236	43.811	43.0012	43.4697	42.7497	46.9456	45.9712		109.952		89.957
35.881	43.3547	44.2399	45.1236	43.811	43.0012	43.4697	42.7497	46.9456	45.9712		109.952		89.957
35.881	43.3547	44.2399	45.1236	43.811	43.0012	43.4697	42.7497	46.9456	45.9712		109.952		89.957
35.881	43.3547	44.2399	45.1236	43.811	43.0012	43.4697	42.7497	46.9456	45.9712		109.496		89.957
35.881	43.3547	44.2399	45.1236	43.811	43.0012	43.4697	42.7497	46.9456	45.9712		109.496		89.957
35.881	43.3547	44.2399	45.1236	43.811	43.0012	43.4697	42.7497		45.9712		109.496		86.0937
35.881	43.3547	44.2399	45.1236	43.811	43.0012	43.4697	42.7497		45.9712		109.496		84.726
35.881	43.3547	44.2399	45.1236	43.811	43.0012	43.4697	42.7497		45.9712		109.496		84.726
35.881	43.3547	44.2399	45.1236	43.811	43.0012	43.4697	42.7497		45.9712		109.496		84.726
35.881	43.3547	44.2399	45.1236	43.811	43.0012	43.4697	42.7497		45.9712		109.496		84.726
35.881	43.3547	44.2399	45.1236	43.811	43.0012	43.4697	42.7497		45.9712		109.496		84.726
35.881	43.3547	44.2399	45.1236		43.0012	43.4697	42.7497		45.9712		109.496		84.726
35.881	43.3547	44.2399	45.1236		43.0012	43.4697	42.7497		45.9712		109.143		84.726
35.881	43.3547	44.2399	45.1236		43.0012	43.4697	42.7497		45.9712		109.143		84.726
35.881	43.3547	44.2399	45.1236		43.0012	43.4697	42.7497		45.9712		109.143		83.7516
35.881	43.3547	44.2399	45.1236		43.0012	43.4697	42.7497		45.9712		109.143		83.7516
35.881	43.3547	34.8275	45.1236		43.0012	43.4697	42.7497		45.9712		109.143		83.7516
35.881	43.3547	34.8275	45.1236		43.0012	43.4697	42.7497		45.9712		101.971		83.7516
35.881	43.3547	34.8275	45.1236		43.0012	43.4697	42.7497		45.9712		101.971		83.7516
35.881	43.3547	34.8275	45.1236		43.0012	43.4697	42.7497		45.9712		101.971		83.7516
35.881	43.3547	34.8275	45.1236		43.0012	43.4697	42.7497		45.9712		101.971		83.7516
35.881	43.3547	34.8275	45.1236		43.0012	43.4697	42.7497		45.9712		101.971		83.7516
35.881	43.3547	34.8275	45.1236		43.0012	43.4697	42.7497		45.9712		101.971		83.7516
35.881	43.3547	34.8275	45.1236		43.0012	43.4697	42.7497		45.9712		101.971		83.7516
35.881	43.3547	34.8275	45.1236		43.0012	43.4697	42.7497		45.9712		101.971		83.7516
35.881	43.3547	34.8275	45.1236		43.0012	43.4697	42.7497		45.9712		101.971		81.221
35.881	43.3547	34.8275	45.1236		43.0012	43.4697	42.7497		45.9712		101.971		81.221
35.881	43.3547	34.8275	45.1236		43.0012	43.4697	42.7497		45.9712		101.751		81.221
35.881	43.3547	34.8275	45.1236		43.0012	43.4697	42.7497		45.9712		101.751		81.221
35.881	43.3547	34.8275	45.1236		43.0012	43.4697	42.7497		45.9712		101.751		81.221
35.881	43.3547	34.8275	45.1236		43.0012	43.4697	42.7497		45.9712		101.751		81.221
35.881	43.3547	34.8275	45.1236		43.0012	43.4697	42.7497		45.9712		101.751		81.221
35.881	43.3547	34.8275	45.1236		43.0012	43.4697	42.7497		45.9712		101.751		81.221
35.881	43.3547	34.8275	45.1236		43.0012	43.4697	42.7497		45.9712		101.751		81.221
35.881	43.3547	34.8275	45.1236		43.0012	43.4697	42.7497		45.9712		101.751		81.221
35.881	43.3547	34.8275	45.1236		43.0012	43.4697	42.7497		45.9712		100.867		81.221
35.881	43.3547	34.8275	45.1236		43.0012	43.4697	42.7497		45.9712		100.867		81.221
35.881	43.3547	34.8275	45.1236		43.0012	43.4697	42.7497		45.9712		100.867		81.221
35.881	43.3547	34.8275	45.1236		43.0012	43.4697	42.7497		45.9712		100.867		81.221
35.881	43.3547	34.8275	35.7112		43.0012	43.4697	42.7497		45.9712		100.867		80.5009
35.881	43.3547	34.8275	35.7112		43.0012	43.4697	42.7497		45.9712		100.867		80.5009
35.881	43.3547	34.8275	35.7112		43.0012	43.4697	42.7497		45.9712		100.867		80.5009
35.881	43.3547	34.8275	35.7112		43.0012	43.4697	42.7497		45.9712		100.867		80.5009
35.881	43.3547	34.8275	35.7112		43.0012	43.4697	42.7497		45.9712		100.482		80.5009
35.881	43.3547	34.8275	35.7112		43.0012	43.4697	42.7497		45.9712		100.482		80.5009
35.881	43.3547	34.8275	35.7112		43.0012	43.4697	42.7497		45.9712		100.482		80.5009
35.881	43.3547	34.8275	35.7112		43.0012	43.4697	42.7497		45.9712		100.482		80.5009
35.881	43.3547	34.8275	35.7112		43.0012	43.4697	42.7497		45.9712		100.482		75.2699
35.881	43.3547	34.8275	35.7112		43.0012	43.4697	42.7497		45.9712		100.482		75.2699
35.881	43.3547	34.8275	35.7112		43.0012	43.4697	42.7497		45.9712		100.482		75.2699
35.881	43.3547	34.8275	35.7112		43.0012	43.4697	42.7497		45.9712		100.025		75.2699
35.881	43.3547	34.8275	35.7112		43.0012	43.4697	42.7497		45.9712		100.025		75.2699
35.881	43.3547	34.8275	35.7112		43.0012	43.4697	42.7497		45.9712		100.025		75.2699
35.881	43.3547	34.8275	35.7112		43.0012	43.4697	42.7497		45.9712		100.025		75.2699
35.881	43.3547	34.8275	35.7112		43.0012		42.7497		45.9712		100.025		75.2699
35.881	43.3547	34.8275	35.7112		43.0012		42.7497		45.9712		100.025		75.2699
35.881	43.3547	34.8275	35.7112		43.0012		42.7497		45.9712		100.025		75.2699
35.881	43.3547	34.8275	35.7112		43.0012		42.7497		45.9712		100.025		75.2699
35.881	43.3547	34.8275	35.7112		43.0012		42.7497		45.9712		100.025		75.2699
35.881	43.3547	34.8275	35.7112		43.0012		42.7497		45.9712		100.025		75.2699
35.881	43.3547	34.8275	35.7112		43.0012		42.7497		45.9712		99.6719		75.2699
35.881	43.3547	34.8275	35.7112		43.0012		42.7497		45.9712		99.6719		75.2699
35.881	43.3547	34.8275	35.7112		43.0012		42.7497		45.9712		99.6719		75.2699
35.881	43.3547	34.8275	35.7112		43.0012		42.7497		45.9712		99.6719		75.2699
35.881	43.3547	34.8275	35.7112		43.0012		42.7497				92.508		75.2699
35.881	43.3547	34.8275	35.7112		43.0012						92.508		75.2699
35.881	43.3547	34.8275	35.7112		43.0012						92.508		75.2699
35.881	43.3547	34.8275	35.7112		43.0012						92.508		75.2699
35.881	43.3547	34.8275	35.7112		43.0012						92.508		75.2699
35.881	43.3547	34.8275	35.7112		43.0012						92.508		75.2699
35.881	43.3547	34.8275	35.7112		43.0012						92.508		75.2699
35.881	43.3547	34.8275	35.7112		43.0012						92.508		75.2699
35.881	43.3547	34.8275	35.7112		43.0012						92.508		75.2699
35.881	43.3547	34.8275	35.7112		43.0012						92.508		75.2699
35.881	43.3547	34.8275	35.7112		43.0012						92.508		75.2699
35.881	43.3547	34.8275	35.7112		43.0012						92.2945		74.2956
35.881	43.3547	34.8275	35.7112		43.0012						92.2945		74.2956
35.881	43.3547	34.8275	35.7112		43.0012						92.2945		74.2956
35.881	43.3547	34.8275	35.7112		43.0012						92.2945		74.2956
35.881	43.3547	34.8275	35.7112		43.0012						92.2945		74.2956
35.881	43.3547	34.8275	35.7112		43.0012						92.2945		74.2956
35.881	43.3547	34.8275	35.7112		43.0012						92.2945		74.2956
35.881	43.3547	34.8275	35.7112		43.0012						92.2945		74.2956
35.881	43.3547	34.8275	35.7112		43.0012						92.2945		74.2956
35.881	43.3547	34.8275	35.7112		43.0012						92.2945		74.2956
35.881	43.3547	34.8275	35.7112		43.0012						92.2945		74.2956
35.881	43.3547	34.8275	35.7112		43.0012						92.2945		74.2956
35.881	43.3547	34.8275	35.7112		43.0012						92.2945		74.2956
35.881	43.3547	34.8275	35.7112		43.0012						91.4109		74.2956
35.881	43.3547	34.8275	35.7112		43.0012						91.4109		74.2956
35.881	43.3547	34.8275	35.7112		43.0012						91.4109		74.2956
35.881	43.3547	34.8275	35.7112		43.0012						91.4109		74.2956
35.881	43.3547	34.8275	35.7112		43.0012						91.4109		74.2956
35.881	43.3547	34.8275	35.7112		43.0012						91.4109		74.2956
35.881	43.3547	34.8275	35.7112		43.0012						91.4109		74.2956
35.881	43.3547	34.8275	35.7112		43.0012						91.4109		74.2956
35.881	43.3547	34.8275	35.7112		43.0012						91.4109		74.2956
35.881	43.3547	34.8275	35.7112		43.0012						91.4109		74.2956
35.881	43.3547	34.8275	35.7112		43.0012						91.4109		74.2956
35.881	43.3547	34.8275	35.7112		43.0012						91.0183		71.7722
35.881	43.3547	34.8275	35.7112		43.0012						91.0183		71.7722
35.881	43.3547	34.8275	35.7112		43.0012						91.0183		71.7722
35.881	43.3547	34.8275	35.7112		43.0012						91.0183		71.7722
35.881	43.3547	34.8275	35.7112		43.0012						91.0183		71.7722
35.881	43.3547	34.8275	35.7112		43.0012						91.0183		71.7722
35.881	43.3547	34.8275	35.7112		43.0012						91.0183		71.7722
35.881	43.3547	34.8275	35.7112		43.0012						90.562		71.7722
35.881	43.3547	34.8275	35.7112		43.0012						90.562		71.7722
35.881	43.3547	34.8275	35.7112		43.0012						90.562		71.7722
35.881	43.3547	34.8275	35.7112		43.0012						90.562		71.7722
35.881	43.3547	34.8275	35.7112		43.0012						90.562		71.7722
35.881	43.3547	34.8275	35.7112		43.0012						90.562		71.7722
35.881	43.3547	34.8275	35.7112		43.0012						90.562		71.7722
35.881	43.3547	34.8275	35.7112		43.0012						90.562		71.7722
35.881	43.3547	34.8275	35.7112		43.0012						90.562		71.7722
35.881	43.3547	34.8275	35.7112		43.0012						90.562		71.7722
35.881	43.3547	34.8275	35.7112		43.0012						90.562		71.7722
35.881	43.3547	34.8275	35.7112		43.0012						90.562		71.7722
35.881	43.3547	34.8275	35.7112		43.0012						90.562		71.7722
35.881	43.3547	34.8275	35.7112		43.0012						90.562		71.7722
35.881	43.3547	34.8275	35.7112								90.562		71.7722
35.881	43.3547	34.8275	35.7112								90.562		71.0522
35.881	43.3547	34.8275	35.7112								90.562		71.0522
35.881	43.3547	34.8275	35.7112								90.2085		71.0522
35.881	43.3547	34.8275	35.7112								90.2085		71.0522
35.881	43.3547	34.8275	35.7112								90.2085		71.0522
35.881	43.3547	34.8275	35.7112								90.2085		71.0522
35.881	43.3547	34.8275	35.7112								90.2085		71.0522
35.881	43.3547	34.8275	35.7112								90.2085		71.0522
35.881	43.3547	34.8275	35.7112								90.2085		71.0522
35.881	43.3547	34.8275	35.7112								90.2085		71.0522
35.881	43.3547	34.8275	35.7112								90.2085		71.0522
35.881	43.3547	34.8275	35.7112								90.2085		71.0522
35.881	43.3547	34.8275	35.7112								90.2085		71.0522
35.881	43.3547	34.8275	35.7112								90.2085		71.0522
35.881	43.3547	34.8275	35.7112								83.0519		71.0522
35.881	43.3547	34.8275	35.7112								83.0519		71.0522
35.881	43.3547	34.8275	35.7112								83.0519		71.0522
35.881	43.3547	34.8275	35.7112								83.0519		71.0522
35.881	43.3547	34.8275	35.7112								83.0519		71.0522
35.881	43.3547	34.8275	35.7112								83.0519		71.0522
35.881	43.3547	34.8275	35.7112								82.8458		71.0522
35.881	43.3547	34.8275	35.7112								82.8458		71.0522
35.881	43.3547	34.8275	35.7112								82.8458		65.8212
35.881	43.3547	34.8275	35.7112								82.8458		65.8212
35.881	43.3547	34.8275	35.7112								82.8458		65.8212
35.881	43.3547	34.8275	35.7112								82.8458		65.8212
35.881	43.3547	34.8275	35.7112								82.8458		65.8212
35.881	43.3547	34.8275	35.7112								82.8458		65.8212
35.881	43.3547	34.8275	35.7112								82.8458		65.8212
35.881	43.3547	34.8275	35.7112								82.8458		65.8212
35.881	43.3547	34.8275	35.7112								82.8458		65.8212
35.881	43.3547	34.8275	35.7112								82.8458		65.8212
35.881	43.3547	34.8275	35.7112								82.8458		65.8212
35.881	43.3547	34.8275	35.7112								81.9621		65.8212
35.881	43.3547	34.8275	35.7112								81.9621		65.8212
35.881	43.3547	34.8275	35.7112								81.9621		65.8212
35.881	43.3547	34.8275	35.7112								81.9621		65.8212
35.881	43.3547	34.8275	35.7112								81.9621		65.8212
35.881	43.3547	34.8275	35.7112								81.9621		65.8212
35.881	43.3547	34.8275	35.7112								81.9621		65.8212
35.881	43.3547	34.8275	35.7112								81.9621		65.8212
35.881		34.8275	35.7112								81.9621		65.8212
35.881		34.8275	35.7112								81.9621		65.8212
35.881		34.8275	35.7112								81.9621		65.8212
35.881		34.8275	35.7112								81.9621		65.8212
35.881		34.8275	35.7112								81.9621		65.8212
35.881		34.8275	35.7112								81.9621		65.8212
35.881		34.8275	35.7112								81.5623		65.8212
35.881		34.8275	35.7112								81.5623		65.8212
35.881		34.8275	35.7112								81.5623		65.8212
35.881		34.8275	35.7112								81.5623		65.8212
35.881		34.8275	35.7112								81.5623		65.8212
35.881		34.8275	35.7112								81.5623		65.8212
35.881		34.8275	35.7112								81.5623		64.8468
35.881		34.8275	35.7112								81.5623		64.8468
35.881		34.8275	35.7112								81.5623		64.8468
35.881		34.8275	35.7112								81.5623		64.8468
35.881		34.8275	35.7112								81.5623		64.8468
35.881		34.8275	35.7112								81.5623		64.8468
35.881		34.8275	35.7112								81.5623		64.8468
35.881		34.8275	35.7112								81.5623		64.8468
		34.8275	35.7112								81.5623		64.8468
		34.8275	35.7112								81.5623		64.8468
		34.8275	35.7112								81.5623		64.8468
		34.8275	35.7112								81.5623		64.8468
		34.8275	35.7112								81.5623		64.8468
		34.8275	35.7112								81.106		64.8468
		34.8275	35.7112								81.106		64.8468
		34.8275	35.7112								81.106		64.8468
		34.8275	35.7112								81.106		64.8468
		34.8275	35.7112								81.106		64.8468
		34.8275	35.7112								81.106		64.8468
		34.8275	35.7112								81.106		64.8468
		34.8275	35.7112								81.106		64.8468
		34.8275	35.7112								81.106		64.8468
		34.8275	35.7112								81.106		64.8468
		34.8275	35.7112								81.106		64.8468
		34.8275	35.7112								81.106		64.8468
		34.8275	35.7112								81.106		64.8468
		34.8275	35.7112								81.106		64.8468
		34.8275	35.7112								81.106		64.8468
		34.8275	35.7112								81.106		64.8468
		34.8275	35.7112								81.106		64.8468
		34.8275	35.7112								81.106		64.8468
		34.8275	35.7112								81.106		64.8468
		34.8275	35.7112								81.106		64.8468
		34.8275	35.7112								81.106		64.8468
		34.8275	35.7112								81.106		64.8468
		34.8275	35.7112								80.7525		64.8468
		34.8275	35.7112								80.7525		64.8468
		34.8275	35.7112								80.7525		64.8468
		34.8275	35.7112								80.7525		64.8468
		34.8275	35.7112								80.7525		64.8468
		34.8275	35.7112								80.7525		64.8468
		34.8275	35.7112								80.7525		64.8468
		34.8275	35.7112								80.7525		64.8468
		34.8275	35.7112								80.7525		64.8468
		34.8275	35.7112								80.7525		62.3308
		34.8275	35.7112								80.7525		62.3308
		34.8275	35.7112								80.7525		62.3308
		34.8275	35.7112								80.7525		62.3308
		34.8275	35.7112								80.7525		62.3308
		34.8275	35.7112								80.7525		62.3308
		34.8275	35.7112								80.7525		62.3308
		34.8275	35.7112								80.7525		62.3308
		34.8275	35.7112								80.7525		62.3308
		34.8275	35.7112								80.7525		62.3308
		34.8275	35.7112								80.7525		62.3308
		34.8275	35.7112								80.7525		62.3308
		34.8275	35.7112								73.6032		62.3308
		34.8275	35.7112								73.6032		62.3308
		34.8275	35.7112								73.6032		62.3308
		34.8275	35.7112								73.6032		62.3308
		34.8275	35.7112								73.6032		62.3308
		34.8275	35.7112								73.6032		62.3308
		34.8275	35.7112								73.6032		62.3308
		34.8275	35.7112								73.6032		62.3308
		34.8275	35.7112								73.6032		62.3308
		34.8275	35.7112								73.6032		62.3308
		34.8275	35.7112								73.6032		62.3308
		34.8275	35.7112								73.6032		62.3308
		34.8275	35.7112								73.6032		62.3308
		34.8275	35.7112								73.6032		62.3308
		34.8275	35.7112								73.6032		62.3308
		34.8275	35.7112								73.6032		62.3308
		34.8275	35.7112								73.6032		62.3308
		34.8275	35.7112								73.6032		62.3308
		34.8275	35.7112								73.6032		62.3308
		34.8275	35.7112								73.6032		62.3308
		34.8275	35.7112								73.4043		62.3308
		34.8275	35.7112								73.4043		62.3308
		34.8275	35.7112								73.4043		62.3308
		34.8275	35.7112								73.4043		62.3308
		34.8275	35.7112								73.4043		62.3308
		34.8275	35.7112								73.4043		62.3308
		34.8275	35.7112								73.4043		62.3308
		34.8275	35.7112								73.4043		62.3308
		34.8275	35.7112								73.4043		62.3308
		34.8275	35.7112								73.4043		62.3308
		34.8275	35.7112								73.4043		61.6108
		34.8275	35.7112								73.4043		61.6108
		34.8275	35.7112								73.4043		61.6108
		34.8275	35.7112								73.4043		61.6108
		34.8275	35.7112								73.4043		61.6108
		34.8275	35.7112								73.4043		61.6108
		34.8275	35.7112								73.4043		61.6108
		34.8275	35.7112								73.4043		61.6108
		34.8275	35.7112								73.4043		61.6108
		34.8275	35.7112								73.4043		61.6108
		34.8275	35.7112								73.4043		61.6108
		34.8275	35.7112								73.4043		61.6108
		34.8275	35.7112								73.4043		61.6108
		34.8275	35.7112								73.4043		61.6108
		34.8275	35.7112								73.4043		61.6108
		34.8275	35.7112								72.5207		61.6108
		34.8275	35.7112								72.5207		61.6108
		34.8275	35.7112								72.5207		61.6108
		34.8275	35.7112								72.5207		61.6108
		34.8275	35.7112								72.5207		61.6108
		34.8275	35.7112								72.5207		61.6108
		34.8275	35.7112								72.5207		61.6108
		34.8275	35.7112								72.5207		61.6108
		34.8275	35.7112								72.5207		61.6108
		34.8275	35.7112								72.5207		61.6108
		34.8275	35.7112								72.5207		61.6108
		34.8275	35.7112								72.5207		61.6108
		34.8275	35.7112								72.5207		61.6108
		34.8275	35.7112								72.5207		61.6108
		34.8275	35.7112								72.5207		61.6108
		34.8275	35.7112								72.5207		61.6108
		34.8275	35.7112								72.5207		61.6108
		34.8275	35.7112								72.5207		61.6108
		34.8275	35.7112								72.5207		61.6108
		34.8275	35.7112								72.1136		59.1317
		34.8275	35.7112								72.1136		56.3798
		34.8275	35.7112								72.1136		56.3798
		34.8275	35.7112								72.1136		56.3798
		34.8275	35.7112								72.1136		56.3798
		34.8275	35.7112								72.1136		56.3798
		34.8275	35.7112								72.1136		56.3798
		34.8275	35.7112								72.1136		56.3798
		34.8275	35.7112								72.1136		56.3798
		34.8275	35.7112								72.1136		56.3798
		34.8275	35.7112								72.1136		56.3798
		34.8275	35.7112								72.1136		56.3798
		34.8275	35.7112								72.1136		56.3798
		34.8275	35.7112								72.1136		56.3798
		34.8275	35.7112								72.1136		56.3798
		34.8275	35.7112								72.1136		56.3798
		34.8275	35.7112								72.1136		56.3798
		34.8275	35.7112								72.1136		56.3798
		34.8275	35.7112								72.1136		56.3798
		34.8275	35.7112								72.1136		56.3798
		34.8275	35.7112								72.1136		56.3798
		34.8275	35.7112								72.1136		56.3798
		34.8275	35.7112								72.1136		56.3798
		34.8275	35.7112								72.1136		56.3798
			35.7112								72.1136		56.3798
			35.7112								71.6572		56.3798
			35.7112								71.6572		56.3798
			35.7112								71.6572		56.3798
			35.7112								71.6572		56.3798
			35.7112								71.6572		56.3798
			35.7112								71.6572		56.3798
			35.7112								71.6572		56.3798
			35.7112								71.6572		56.3798
			35.7112								71.6572		56.3798
			35.7112								71.6572		56.3798
			35.7112								71.6572		56.3798
			35.7112								71.6572		56.3798
			35.7112								71.6572		56.3798
			35.7112								71.6572		56.3798
			35.7112								71.6572		56.3798
			35.7112								71.6572		56.3798
			35.7112								71.6572		56.3798
			35.7112								71.6572		56.3798
			35.7112								71.6572		56.3798
			35.7112								71.6572		56.3798
			35.7112								71.6572		56.3798
			35.7112								71.6572		56.3798
			35.7112								71.6572		56.3798
			35.7112								71.6572		56.3798
			35.7112								71.6572		56.3798
			35.7112								71.6572		56.3798
			35.7112								71.6572		56.3798
			35.7112								71.6572		56.3798
			35.7112								71.6572		56.3798
			35.7112								71.6572		56.3798
			35.7112								71.6572		56.3798
			35.7112								71.6572		56.3798
			35.7112								71.6572		56.3798
			35.7112								71.3038		56.3798
			35.7112								71.3038		56.3798
			35.7112								71.3038		55.4054
			35.7112								71.3038		55.4054
			35.7112								71.3038		55.4054
			35.7112								71.3038		55.4054
			35.7112								71.3038		55.4054
			35.7112								71.3038		55.4054
			35.7112								71.3038		55.4054
			35.7112								71.3038		55.4054
			35.7112								71.3038		55.4054
			35.7112								71.3038		55.4054
											71.3038		55.4054
											71.3038		55.4054
											71.3038		55.4054
											71.3038		55.4054
											71.3038		55.4054
											71.3038		55.4054
											71.3038		55.4054
											71.3038		55.4054
											71.3038		55.4054
											71.3038		55.4054
											71.3038		55.4054
											71.3038		55.4054
											71.3038		55.4054
											71.3038		55.4054
											71.3038		55.4054
											71.3038		55.4054
											71.3038		55.4054
											71.3038		55.4054
											71.3038		55.4054
											64.1617		55.4054
											64.1617		55.4054
											64.1617		55.4054
											64.1617		55.4054
											64.1617		55.4054
											64.1617		55.4054
											64.1617		55.4054
											64.1617		55.4054
											64.1617		55.4054
											64.1617		55.4054
											64.1617		55.4054
											64.1617		55.4054
											64.1617		55.4054
											64.1617		55.4054
											64.1617		55.4054
											64.1617		55.4054
											64.1617		55.4054
											64.1617		55.4054
											64.1617		55.4054
											64.1617		55.4054
											64.1617		55.4054
											64.1617		55.4054
											64.1617		55.4054
											64.1617		55.4054
											63.9702		55.4054
											63.9702		55.4054
											63.9702		55.4054
											63.9702		55.4054
											63.9702		55.4054
											63.9702		55.4054
											63.9702		55.4054
											63.9702		55.4054
											63.9702		55.4054
											63.9702		55.4054
											63.9702		55.4054
											63.9702		55.4054
											63.9702		55.4054
											63.9702		55.4054
											63.9702		55.4054
											63.9702		55.4054
											63.9702		55.4054
											63.9702		55.4054
											63.9702		55.4054
											63.9702		55.4054
											63.9702		55.4054
											63.9702		55.4054
											63.9702		55.4054
											63.9702		55.4054
											63.9702		55.4054
											63.9702		52.8966
											63.9702		52.8966
											63.9702		52.8966
											63.9702		52.8966
											63.9702		52.8966
											63.9702		52.8966
											63.9702		52.8966
											63.9702		52.8966
											63.9702		52.8966
											63.9702		52.8966
											63.9702		52.8966
											63.0865		52.8966
											63.0865		52.8966
											63.0865		52.8966
											63.0865		52.8966
											63.0865		52.8966
											63.0865		52.8966
											63.0865		52.8966
											63.0865		52.8966
											63.0865		52.8966
											63.0865		52.8966
											63.0865		52.8966
											63.0865		52.8966
											63.0865		52.8966
											63.0865		52.8966
											63.0865		52.8966
											63.0865		52.8966
											63.0865		52.8966
											63.0865		52.8966
											63.0865		52.8966
											63.0865		52.8966
											63.0865		52.8966
											63.0865		52.8966
											63.0865		52.8966
											63.0865		52.8966
											63.0865		52.8966
											63.0865		52.8966
											63.0865		52.8966
											63.0865		52.8966
											63.0865		52.8966
											62.6721		52.8966
											62.6721		52.8966
											62.6721		52.8966
											62.6721		52.8966
											62.6721		52.8966
											62.6721		52.8966
											62.6721		52.8966
											62.6721		52.8966
											62.6721		52.8966
											62.6721		52.8966
											62.6721		52.8966
											62.6721		52.8966
											62.6721		52.8966
											62.6721		52.8966
											62.6721		52.8966
											62.6721		52.8966
											62.6721		52.8966
											62.6721		52.8966
											62.6721		52.8966
											62.6721		52.8966
											62.6721		52.8966
											62.6721		52.8966
											62.6721		52.8966
											62.6721		52.8966
											62.6721		52.8966
											62.6721		52.3912
											62.6721		52.1766
											62.6721		52.1766
											62.6721		52.1766
											62.6721		52.1766
											62.6721		52.1766
											62.6721		52.1766
											62.2158		52.1766
											62.2158		52.1766
											62.2158		52.1766
											62.2158		52.1766
											62.2158		52.1766
											62.2158		52.1766
											62.2158		52.1766
											62.2158		52.1766
											62.2158		52.1766
											62.2158		52.1766
											62.2158		52.1766
											62.2158		52.1766
											62.2158		52.1766
											62.2158		52.1766
											62.2158		52.1766
											62.2158		52.1766
											62.2158		52.1766
											62.2158		52.1766
											62.2158		52.1766
											62.2158		52.1766
											62.2158		52.1766
											62.2158		52.1766
											62.2158		52.1766
											62.2158		52.1766
											62.2158		52.1766
											62.2158		52.1766
											62.2158		52.1766
											62.2158		52.1766
											62.2158		52.1766
											62.2158		52.1766
											62.2158		52.1766
											62.2158		52.1766
											62.2158		52.1766
											62.2158		52.1766
											62.2158		52.1766
											62.2158		52.1766
											62.2158		52.1766
											62.2158		52.1766
											62.2158		52.1766
											62.2158		52.1766
											62.2158		52.1766
											62.2158		52.1766
											62.2158		52.1766
											62.2158		52.1766
											62.2158		52.1766
											62.2158		52.1766
											62.2158		52.1766
											62.2158		52.1766
											62.2158		52.1766
											62.2158		52.1766
											62.2158		52.1766
											62.2158		52.1766
											62.2158		52.1766
											62.2158		52.1766
											62.2158		52.1766
											62.2158		52.1766
											62.2158		52.1766
											61.8623		52.1766
											61.8623		52.1766
											61.8623		52.1766
											61.8623		52.1766
											61.8623		52.1766
											61.8623		52.1766
											61.8623		46.9456
											61.8623		46.9456
											61.8623		46.9456
											61.8623		46.9456
											61.8623		46.9456
											61.8623		46.9456
											61.8623		46.9456
											61.8623		46.9456
											61.8623		46.9456
											61.8623		46.9456
											61.8623		46.9456
											61.8623		46.9456
											61.8623		46.9456
											61.8623		46.9456
											61.8623		46.9456
											61.8623		46.9456
											61.8623		46.9456
											61.8623		46.9456
											61.8623		46.9456
											61.8623		46.9456
											61.8623		46.9456
											61.8623		46.9456
											61.8623		46.9456
											61.8623		46.9456
											61.8623		46.9456
											61.8623		46.9456
											61.8623		46.9456
											61.8623		46.9456
											61.8623		46.9456
											61.8623		46.9456
											61.8623		46.9456
											61.8623		46.9456
											61.8623		46.9456
											61.8623		46.9456
											61.8623		46.9456
											61.8623		46.9456
											61.8623		46.9456
											61.8623		46.9456
											61.8623		46.9456
											61.8623		46.9456
											61.8623		46.9456
											61.8623		46.9456
											54.7276		46.9456
											54.7276		46.9456
											54.7276		46.9456
											54.7276		46.9456
											54.7276		46.9456
											54.7276		46.9456
											54.7276		46.9456
											54.7276		46.9456
											54.7276		46.9456
											54.7276		46.9456
											54.7276		46.9456
											54.7276		46.9456
											54.7276		46.9456
											54.7276		46.9456
											54.7276		46.9456
											54.7276		46.9456
											54.7276		46.9456
											54.7276		46.9456
											54.7276		46.9456
											54.7276		46.9456
											54.7276		46.9456
											54.7276		46.9456
											54.7276		46.9456
											54.7276		46.9456
											54.7276		46.9456
											54.7276		46.9456
											54.7276		46.9456
											54.7276		46.9456
											54.7276		46.9456
											54.7276		46.9456
											54.7276		46.9456
											54.7276		46.9456
											54.7276		46.9456
											54.7276		46.9456
											54.7276		46.9456
											54.7276		46.9456
											54.7276		46.9456
											54.7276		46.9456
											54.7276		46.9456
											54.7276		46.9456
											54.7276		46.9456
											54.7276		46.9456
											54.7276		46.9456
											54.7276		46.9456
											54.5433		46.9456
											54.5433		46.9456
											54.5433		46.9456
											54.5433		46.9456
											54.5433		46.9456
											54.5433		46.9456
											54.5433		46.9456
											54.5433		46.9456
											54.5433		46.9456
											54.5433		46.9456
											54.5433		46.9456
											54.5433		46.9456
											54.5433		46.9456
											54.5433		46.9456
											54.5433		46.9456
											54.5433		46.9456
											54.5433		46.9456
											54.5433		46.9456
											54.5433		46.9456
											54.5433		46.9456
											54.5433		46.9456
											54.5433		46.9456
											54.5433		45.9712
											54.5433		45.9712
											54.5433		45.9712
											54.5433		45.9712
											54.5433		45.9712
											54.5433		45.9712
											54.5433		45.9712
											54.5433		45.9712
											54.5433		45.9712
											54.5433		45.9712
											54.5433		45.9712
											54.5433		45.9712
											54.5433		45.9712
											54.5433		45.9712
											54.5433		45.9712
											54.5433		45.9712
											54.5433		45.9712
											54.5433		45.9712
											54.5433		45.9712
											54.5433		45.9712
											54.5433		45.9712
											54.5433		45.9712
											54.5433		45.9712
											54.5433		45.9712
											54.5433		45.9712
											53.6596		45.9712
											53.6596		45.9712
											53.6596		45.9712
											53.6596		45.9712
											53.6596		45.9712
											53.6596		45.9712
											53.6596		45.9712
											53.6596		45.9712
											53.6596		45.9712
											53.6596		45.9712
											53.6596		45.9712
											53.6596		45.9712
											53.6596		45.9712
											53.6596		45.9712
											53.6596		45.9712
											53.6596		45.9712
											53.6596		45.9712
											53.6596		45.9712
											53.6596		45.9712
											53.6596		45.9712
											53.6596		45.9712
											53.6596		45.9712
											53.6596		45.9712
											53.6596		45.9712
											53.6596		45.9712
											53.6596		45.9712
											53.6596		45.9712
											53.6596		45.9712
											53.6596		45.9712
											53.6596		45.9712
											53.6596		45.9712
											53.6596		45.9712
											53.6596		45.9712
											53.6596		45.9712
											53.6596		45.9712
											53.6596		45.9712
											53.6596		45.9712
											53.6596		45.9712
											53.6596		45.9712
											53.6596		45.9712
											53.6596		45.9712
											53.6596		45.9712
											53.6596		45.9712
											53.6596		45.9712
											53.6596		45.9712
											53.6596		45.9712
											53.6596		45.9712
											53.6596		45.9712
											53.6596		45.9712
											53.6596		45.9712
											53.6596		45.9712
											53.6596		45.9712
											53.6596		45.9712
											53.6596		45.9712
											53.6596		45.9712
											53.6596		45.9712
											53.6596		45.9712
											53.6596		45.9712
											53.6596		45.9712
											53.6596		45.9712
											53.6596		45.9712
											53.6596		45.9712
											53.6596		45.9712
											53.6596		45.9712
											53.6596		45.9712
											53.6596		45.9712
											53.354		45.9712
											53.2379		45.9712
											53.2379		45.9712
											53.2379		45.9712
											53.2379		45.9712
											53.2379		45.9712
											53.2379		45.9712
											53.2379		45.9712
											53.2379		45.9712
											53.2379		45.9712
											53.2379		45.9712
											53.2379		45.9712
											53.2379		45.9712
											53.2379		45.9712
											53.2379		45.9712
											53.2379		45.9712
											53.2379		45.9712
											53.2379		45.9712
											53.2379		45.9712
											53.2379		45.9712
											53.2379		45.9712
											53.2379		45.9712
											53.2379		45.9712
											53.2379		45.9712
											53.2379		45.9712
											53.2379		45.9712
											53.2379		45.9712
											53.2379		45.9712
											53.2379		45.9712
											53.2379		45.9712
											53.2379		45.9712
											53.2379		45.9712
											53.2379		45.9712
											53.2379		45.9712
											53.2379		45.9712
											53.2379		45.9712
											53.2379		45.9712
											53.2379		45.9712
											53.2379		45.9712
											53.2379		45.9712
											53.2379		45.9712
											53.2379		45.9712
											53.2379		45.9712
											53.2379		45.9712
											53.2379		45.9712
											53.2379		45.9712
											53.2379		43.4697
											53.2379		43.4697
											53.2379		43.4697
											53.2379		43.4697
											53.2379		43.4697
											53.2379		43.4697
											53.2379		43.4697
											53.2379		43.4697
											53.2379		43.4697
											53.2379		43.4697
											53.2379		43.4697
											53.2379		43.4697
											53.2379		43.4697
											53.2379		43.4697
											53.2379		43.4697
											53.2379		43.4697
											52.7816		43.4697
											52.7816		43.4697
											52.7816		43.4697
											52.7816		43.4697
											52.7816		43.4697
											52.7816		43.4697
											52.7816		43.4697
											52.7816		43.4697
											52.7816		43.4697
											52.7816		43.4697
											52.7816		43.4697
											52.7816		43.4697
											52.7816		43.4697
											52.7816		43.4697
											52.7816		43.4697
											52.7816		43.4697
											52.7816		43.4697
											52.7816		43.4697
											52.7816		43.4697
											52.7816		43.4697
											52.7816		43.4697
											52.7816		43.4697
											52.7816		43.4697
											52.7816		43.4697
											52.7816		43.4697
											52.7816		43.4697
											52.7816		43.4697
											52.7816		43.4697
											52.7816		43.4697
											52.7816		43.4697
											52.7816		43.4697
											52.7816		43.4697
											52.7816		43.4697
											52.7816		43.4697
											52.7816		43.4697
											52.7816		43.4697
											52.7816		43.4697
											52.7816		43.4697
											52.7816		43.4697
											52.7816		43.4697
											52.7816		43.4697
											52.7816		43.4697
											52.7816		43.4697
											52.7816		43.4697
											52.7816		43.4697
											52.7816		43.4697
											52.7816		43.4697
											52.7816		43.4697
											52.7816		43.4697
											52.7816		43.4697
											52.7816		43.4697
											52.7816		43.4697
											52.7816		43.4697
											52.7816		43.4697
											52.7816		43.4697
											52.7816		43.4697
											52.7816		43.4697
											52.7816		43.4697
											52.7816		43.4697
											52.7816		43.4697
											52.7816		43.4697
											52.7816		43.4697
											52.7816		43.4697
											52.7816		43.4697
											52.7816		43.4697
											52.7816		43.4697
											52.7816		43.4697
											52.7816		43.4697
											52.7816		43.4697
											52.7816		43.4697
											52.7816		43.4697
											52.7816		43.4697
											52.7816		43.4697
											52.7816		43.4697
											52.7816		43.4697
											52.7816		43.4697
											52.7816		43.4697
											52.7816		43.4697
											52.7816		43.4697
											52.7816		43.4697
											52.7816		43.4697
											52.7816		43.4697
											52.7816		43.4697
											52.7816		43.4697
											52.7816		43.4697
											52.4281		43.4697
											52.4281		43.4697
											52.4281		43.4697
											52.4281		43.4697
											52.4281		43.4697
											52.4281		43.4697
											52.4281		43.4697
											52.4281		43.4697
											52.4281		43.4697
											52.4281		43.4697
											52.4281		43.4697
											52.4281		43.4697
											52.4281		43.4697
											52.4281		43.4697
											52.4281		43.4697
											52.4281		43.4697
											52.4281		43.4697
											52.4281		43.4697
											52.4281		43.4697
											52.4281		43.4697
											52.4281		43.4697
											52.4281		43.4697
											52.4281		43.4697
											52.4281		43.4697
											52.4281		43.4697
											52.4281		43.4697
											52.4281		43.4697
											52.4281		43.4697
											52.4281		43.4697
											52.4281		43.4697
											52.4281		43.4697
											52.4281		43.4697
											52.4281		43.4697
											52.4281		43.4697
											52.4281		43.4697
											52.4281		43.4697
											52.4281		43.4697
											52.4281		43.4697
											52.4281		43.4697
											52.4281		42.7497
											52.4281		42.7497
											52.4281		42.7497
											52.4281		42.7497
											52.4281		42.7497
											52.4281		42.7497
											52.4281		42.7497
											52.4281		42.7497
											52.4281		42.7497
											52.4281		42.7497
											52.4281		42.7497
											52.4281		42.7497
											52.4281		42.7497
											52.4281		42.7497
											52.4281		42.7497
											52.4281		42.7497
											52.4281		42.7497
											52.4281		42.7497
											52.4281		42.7497
											52.4281		42.7497
											52.4281		42.7497
											52.4281		42.7497
											52.4281		42.7497
											52.4281		42.7497
											52.4281		42.7497
											52.4281		42.7497
											52.4281		42.7497
											52.4281		42.7497
											52.4281		42.7497
											52.4281		42.7497
											52.4281		42.7497
											52.4281		42.7497
											52.4281		42.7497
											52.4281		42.7497
											52.4281		42.7497
											52.4281		42.7497
											52.4281		42.7497
											52.4281		42.7497
											52.4281		42.7497
											52.4281		42.7497
											52.4281		42.7497
											52.4281		42.7497
											52.4281		42.7497
											52.4281		42.7497
											52.4281		42.7497
											52.4281		42.7497
											52.4281		42.7497
											52.4281		42.7497
											52.4281		42.7497
											52.4281		42.7497
											52.4281		42.7497
											52.4281		42.7497
											52.4281		42.7497
											52.4281		42.7497
											52.4281		42.7497
											52.4281		42.7497
											52.4281		42.7497
											52.4281		42.7497
											52.4281		42.7497
											46.6135		42.7497
											45.3006		42.7497
											45.3006		42.7497
											45.3006		42.7497
											45.3006		42.7497
											45.3006		42.7497
											45.3006		42.7497
											45.3006		42.7497
											45.3006		42.7497
											45.3006		42.7497
											45.3006		42.7497
											45.3006		42.7497
											45.3006		42.7497
											45.3006		42.7497
											45.3006		42.7497
											45.3006		42.7497
											45.3006		42.7497
											45.3006		42.7497
											45.3006		42.7497
											45.3006		42.7497
											45.3006		42.7497
											45.3006		42.7497
											45.3006		42.7497
											45.3006		42.7497
											45.3006		42.7497
											45.3006		42.7497
											45.3006		42.7497
											45.3006		42.7497
											45.3006		42.7497
											45.3006		42.7497
											45.3006		42.7497
											45.3006		42.7497
											45.3006		42.7497
											45.3006		42.7497
											45.3006		42.7497
											45.3006		42.7497
											45.3006		42.7497
											45.3006		42.7497
											45.3006		42.7497
											45.3006		42.7497
											45.3006		42.7497
											45.3006		42.7497
											45.3006		42.7497
											45.3006		42.7497
											45.3006		42.7497
											45.3006		42.7497
											45.3006		42.7497
											45.3006		42.7497
											45.3006		42.7497
											45.3006		42.7497
											45.3006		42.7497
											45.3006		42.7497
											45.3006		42.7497
											45.3006		42.7497
											45.3006		42.7497
											45.3006		42.7497
											45.3006		42.7497
											45.3006		42.7497
											45.3006		42.7497
											45.3006		42.7497
											45.3006		42.7497
											45.3006		42.7497
											45.3006		42.7497
											45.3006		42.7497
											45.3006		42.7497
											45.3006		42.7497
											45.3006		42.7497
											45.3006		42.7497
											45.3006		42.7497
											45.3006		42.7497
											45.3006		42.7497
											45.3006		42.7497
											45.3006		42.7497
											45.3006		42.7497
											45.3006		42.7497
											45.3006		42.7497
											45.3006		42.7497
											45.3006		42.7497
											45.3006		42.7497
											45.3006		42.7497
											45.3006		42.7497
											45.3006		42.7497
											45.3006		42.7497
											45.3006		42.7497
											45.3006		42.7497
											45.3006		42.7497
											45.3006		42.7497
											45.3006		42.7497
											45.3006		42.7497
											45.3006		42.7497
											45.3006		42.7497
											45.3006		42.7497
											45.3006		42.7497
											45.3006		42.7497
											45.3006
											45.3006
											45.1236
											45.1236
											45.1236
											45.1236
											45.1236
											45.1236
											45.1236
											45.1236
											45.1236
											45.1236
											45.1236
											45.1236
											45.1236
											45.1236
											45.1236
											45.1236
											45.1236
											45.1236
											45.1236
											45.1236
											45.1236
											45.1236
											45.1236
											45.1236
											45.1236
											45.1236
											45.1236
											45.1236
											45.1236
											45.1236
											45.1236
											45.1236
											45.1236
											45.1236
											45.1236
											45.1236
											45.1236
											45.1236
											45.1236
											45.1236
											45.1236
											45.1236
											45.1236
											45.1236
											45.1236
											45.1236
											45.1236
											45.1236
											45.1236
											45.1236
											45.1236
											45.1236
											45.1236
											45.1236
											45.1236
											45.1236
											45.1236
											45.1236
											45.1236
											45.1236
											45.1236
											45.1236
											45.1236
											45.1236
											45.1236
											45.1236
											45.1236
											45.1236
											45.1236
											45.1236
											45.1236
											45.1236
											45.1236
											45.1236
											45.1236
											45.1236
											45.1236
											45.1236
											45.1236
											45.1236
											45.1236
											45.1236
											45.1236
											45.1236
											45.1236
											45.1236
											45.1236
											45.1236
											45.1236
											45.1236
											45.1236
											45.1236
											45.1236
											45.1236
											45.1236
											45.1236
											45.1236
											45.1236
											45.1236
											45.1236
											45.1236
											45.1236
											45.1236
											45.1236
											45.1236
											45.1236
											45.1236
											45.1236
											45.1236
											45.1236
											45.1236
											45.1236
											45.1236
											45.1236
											45.1236
											45.1236
											45.1236
											45.1236
											45.1236
											45.1236
											45.1236
											45.1236
											45.1236
											45.1236
											45.1236
											45.1236
											45.1236
											45.1236
											45.1236
											45.1236
											45.1236
											45.1236
											45.1236
											45.1236
											45.1236
											45.1236
											45.1236
											45.1236
											45.1236
											45.1236
											45.1236
											45.1236
											45.1236
											45.1236
											45.1236
											45.1236
											45.1236
											45.1236
											45.1236
											45.1236
											45.1236
											45.1236
											45.1236
											45.1236
											45.1236
											45.1236
											45.1236
											45.1236
											45.1236
											45.1236
											44.2399
											44.2399
											44.2399
											44.2399
											44.2399
											44.2399
											44.2399
											44.2399
											44.2399
											44.2399
											44.2399
											44.2399
											44.2399
											44.2399
											44.2399
											44.2399
											44.2399
											44.2399
											44.2399
											44.2399
											44.2399
											44.2399
											44.2399
											44.2399
											44.2399
											44.2399
											44.2399
											44.2399
											44.2399
											44.2399
											44.2399
											44.2399
											44.2399
											44.2399
											44.2399
											44.2399
											44.2399
											44.2399
											44.2399
											44.2399
											44.2399
											44.2399
											44.2399
											44.2399
											44.2399
											44.2399
											44.2399
											44.2399
											44.2399
											44.2399
											44.2399
											44.2399
											44.2399
											44.2399
											44.2399
											44.2399
											44.2399
											44.2399
											44.2399
											44.2399
											44.2399
											44.2399
											44.2399
											44.2399
											44.2399
											44.2399
											44.2399
											44.2399
											44.2399
											44.2399
											44.2399
											44.2399
											44.2399
											44.2399
											44.2399
											44.2399
											44.2399
											44.2399
											44.2399
											44.2399
											44.2399
											44.2399
											44.2399
											44.2399
											44.2399
											44.2399
											44.2399
											44.2399
											44.2399
											44.2399
											44.2399
											44.2399
											44.2399
											44.2399
											44.2399
											44.2399
											44.2399
											44.2399
											44.2399
											44.2399
											44.2399
											44.2399
											44.2399
											44.2399
											44.2399
											44.2399
											44.2399
											44.2399
											44.2399
											44.2399
											44.2399
											44.2399
											44.2399
											44.2399
											44.2399
											44.2399
											44.2399
											43.811
											43.811
											43.811
											43.811
											43.811
											43.811
											43.811
											43.811
											43.811
											43.811
											43.811
											43.811
											43.811
											43.811
											43.811
											43.811
											43.811
											43.811
											43.811
											43.811
											43.811
											43.811
											43.811
											43.811
											43.811
											43.811
											43.811
											43.811
											43.811
											43.811
											43.811
											43.811
											43.811
											43.811
											43.811
											43.811
											43.811
											43.811
											43.811
											43.811
											43.811
											43.811
											43.811
											43.811
											43.811
											43.811
											43.811
											43.811
											43.811
											43.811
											43.811
											43.811
											43.811
											43.811
											43.811
											43.811
											43.811
											43.811
											43.811
											43.811
											43.811
											43.811
											43.811
											43.811
											43.811
											43.811
											43.811
											43.811
											43.811
											43.811
											43.811
											43.811
											43.811
											43.811
											43.811
											43.811
											43.811
											43.811
											43.811
											43.811
											43.811
											43.811
											43.811
											43.811
											43.811
											43.811
											43.811
											43.811
											43.811
											43.811
											43.811
											43.811
											43.811
											43.811
											43.811
											43.811
											43.811
											43.811
											43.811
											43.811
											43.811
											43.811
											43.811
											43.811
											43.811
											43.811
											43.811
											43.811
											43.811
											43.811
											43.811
											43.811
											43.811
											43.811
											43.811
											43.3547
											43.3547
											43.3547
											43.3547
											43.3547
											43.3547
											43.3547
											43.3547
											43.3547
											43.3547
											43.3547
											43.3547
											43.3547
											43.3547
											43.3547
											43.3547
											43.3547
											43.3547
											43.3547
											43.3547
											43.3547
											43.3547
											43.3547
											43.3547
											43.3547
											43.3547
											43.3547
											43.3547
											43.3547
											43.3547
											43.3547
											43.3547
											43.3547
											43.3547
											43.3547
											43.3547
											43.3547
											43.3547
											43.3547
											43.3547
											43.3547
											43.3547
											43.3547
											43.3547
											43.3547
											43.3547
											43.3547
											43.3547
											43.3547
											43.3547
											43.3547
											43.3547
											43.3547
											43.3547
											43.3547
											43.3547
											43.3547
											43.3547
											43.3547
											43.3547
											43.3547
											43.3547
											43.3547
											43.3547
											43.3547
											43.3547
											43.3547
											43.3547
											43.3547
											43.3547
											43.3547
											43.3547
											43.3547
											43.3547
											43.3547
											43.3547
											43.3547
											43.3547
											43.3547
											43.3547
											43.3547
											43.3547
											43.3547
											43.3547
											43.3547
											43.3547
											43.3547
											43.3547
											43.3547
											43.3547
											43.3547
											43.3547
											43.3547
											43.3547
											43.3547
											43.3547
											43.3547
											43.3547
											43.3547
											43.3547
											43.3547
											43.3547
											43.3547
											43.3547
											43.3547
											43.3547
											43.3547
											43.3547
											43.3547
											43.3547
											43.3547
											43.3547
											43.3547
											43.3547
											43.3547
											43.3547
											43.3547
											43.3547
											43.3547
											43.3547
											43.3547
											43.3547
											43.3547
											43.3547
											43.3547
											43.3547
											43.3547
											43.3547
											43.3547
											43.3547
											43.3547
											43.3547
											43.3547
											43.3547
											43.3547
											43.3547
											43.3547
											43.3547
											43.3547
											43.3547
											43.3547
											43.3547
											43.3547
											43.3547
											43.3547
											43.3547
											43.3547
											43.3547
											43.3547
											43.3547
											43.3547
											43.3547
											43.3547
											43.3547
											43.3547
											43.3547
											43.3547
											43.3547
											43.3547
											43.3547
											43.3547
											43.3547
											43.3547
											43.3547
											43.3547
											43.3547
											43.3547
											43.3547
											43.3547
											43.0012
											43.0012
											43.0012
											43.0012
											43.0012
											43.0012
											43.0012
											43.0012
											43.0012
											43.0012
											43.0012
											43.0012
											43.0012
											43.0012
											43.0012
											43.0012
											43.0012
											43.0012
											43.0012
[truncated: 1,003 more rows]

## Sheet: 5 ppm 24 h
Pt mass [ag]											Pt mass [ag]		Pt mass [ag]
1 mL						2 mL					All samples 1 mL		All samples 2 mL
5ppm 24h 1	5ppm 24h 1_2	5ppm 24h 2	5ppm 24h 2_2	5ppm 24h 3	5ppm 24h 3_2	5ppm 24h 2mL 1	5ppm 24h 2mL 1_2	5ppm 24h 2mL 2	5ppm 24h 2mL 2_2		1664.57		1702.33
5172.27	66157.4	5495.87	4492.54	2133.2	16624.5	18676	89805.7	10281.8	15603.3		1664.12		1663.89
3491.2	22319.7	5271.69	3207.78	2122.09	11472.5	5307.19	22162	7761.25	3586.34		1634.83		1642.45
1664.57	6218.8	1905.34	2232.39	1814.91	6252.19	3029.95	4033.45	7421.57	2850.39		1570.73		1605.76
1377.85	4941.69	1453.97	2143.08	1398.71	3648.07	2391.7	3507.47	6339.27	2502.43		1536.12		1578.34
1346.38	1634.83	1151.24	1966.23	1283.69	3304.79	1880.23	3239.64	3968.02	1843.35		1470.65		1542
1273.25	1570.73	1140.92	1955.25	995.501	2346.1	1663.89	2062.13	2348.06	1843.35		1453.97		1525.42
1190.18	1017.85	1028.03	1470.65	954.857	1664.12	1642.45	1702.33	1525.42	1810.7		1398.71		1514.55
873.281	1007.65	956.701	1333.94	904.235	1536.12	1578.34	1542	1419.54	1799.83		1377.85		1472.2
863.189	805.238	936.396	1157.34	693.808	1283.84	1514.55	1446.74	1283.17	1605.76		1346.38		1446.74
832.961	795.202	785.133	1126.43	664.032	1283.84	1472.2	1134.2	1251.9	1351.43		1333.94		1419.54
752.704	715.199	765.1	1116.14	654.122	1118.37	1419.45	1093.1	1179.24	1351.43		1283.84		1419.45
742.708	705.235	745.1	1095.59	634.327	1016.02	1377.41	1052.13	994.277	1257.32		1283.84		1377.41
742.708	695.278	695.237	983.144	614.562	944.866	1325.04	1001.1	984.079	1132.92		1283.69		1351.43
722.739	695.278	695.237	962.806	604.692	823.807	1220.95	960.422	963.709	1091.71		1273.25		1351.43
692.845	675.388	685.288	922.227	594.829	813.771	1127.98	859.298	912.924	1040.4		1190.18		1325.04
633.269	665.455	645.571	912.103	584.974	753.722	984.697	788.989	902.792	958.717		1157.34		1283.17
633.269	645.612	645.571	871.686	526.006	723.804	903.539	778.977	902.792	958.717		1151.24		1257.32
593.709	615.907	536.994	791.237	526.006	575.276	832.95	768.973	852.25	938.379		1140.92		1251.9
583.839	606.021	429.353	741.216	467.316	575.276	832.95	689.224	832.09	907.933		1126.43		1220.95
564.121	566.554	419.613	701.341	467.316	575.276	812.854	629.743	761.781	867.451		1118.37		1179.24
524.778	566.554	409.881	691.392	467.316	555.605	772.758	609.978	761.781	806.97		1116.14		1134.2
514.962	566.554	400.157	621.97	457.561	555.605	762.753	600.108	731.769	776.838		1095.59		1132.92
485.559	556.707	390.44	621.97	447.814	555.605	712.851	580.39	701.827	726.777		1028.03		1127.98
465.996	537.035	380.731	602.206	438.074	535.964	702.894	550.871	681.906	716.789		1017.85		1093.1
446.463	497.785	380.731	572.617	438.074	506.562	692.946	521.422	662.016	716.789		1016.02		1091.71
446.463	497.785	380.731	552.93	418.618	467.466	613.637	511.621	652.083	706.808		1007.65		1052.13
436.708	497.785	371.03	533.274	399.192	467.466	574.17	472.495	612.429	676.914		995.501		1040.4
407.489	487.992	361.336	533.274	399.192	457.711	564.323	462.732	592.649	637.166		983.144		1001.1
407.489	478.207	351.649	474.492	399.192	428.492	554.484	462.732	563.037	637.166		962.806		994.277
388.048	468.429	351.649	474.492	360.431	428.492	544.652	443.23	553.182	627.249		956.701		984.697
388.048	468.429	351.649	464.722	360.431	409.051	544.652	414.034	543.335	607.437		954.857		984.079
388.048	458.659	351.649	454.959	360.431	399.342	534.828	394.608	543.335	577.779		944.866		963.709
378.339	458.659	322.635	454.959	350.76	389.64	534.828	394.608	533.495	567.908		936.396		960.422
368.638	439.141	322.635	454.959	350.76	389.64	515.203	384.907	533.495	548.19		922.227		958.717
349.257	419.654	322.635	396.545	341.096	379.946	505.402	365.526	523.663	499.031		912.103		958.717
339.578	409.923	293.689	377.134	341.096	379.946	495.609	365.526	504.023	499.031		904.235		938.379
329.907	400.198	293.689	357.754	341.096	370.26	476.045	336.512	474.62	489.223		873.281		912.924
329.907	390.481	293.689	348.075	331.44	370.26	476.045	326.856	474.62	489.223		871.686		907.933
329.907	390.481	284.056	328.74	331.44	360.581	456.513	317.207	474.62	479.422		863.189		903.539
320.243	371.071	284.056	328.74	321.791	350.91	427.271	317.207	474.62	479.422		832.961		902.792
310.587	361.377	284.056	309.435	321.791	350.91	368.993	317.207	464.835	479.422		823.807		902.792
300.938	332.34	284.056	309.435	321.791	341.246	368.993	307.566	455.057	459.843		813.771		867.451
300.938	332.34	284.056	299.794	321.791	341.246	368.993	307.566	455.057	459.843		805.238		859.298
291.297	332.34	274.43	290.16	312.15	331.59	368.993	307.566	445.287	450.065		795.202		852.25
291.297	332.34	274.43	290.16	312.15	321.941	368.993	307.566	445.287	420.778		791.237		832.95
272.038	322.677	274.43	290.16	312.15	321.941	359.307	297.933	435.524	420.778		785.133		832.95
272.038	322.677	264.811	280.534	312.15	302.666	349.628	297.933	416.022	411.03		765.1		832.09
272.038	313.02	264.811	280.534	302.517	302.666	349.628	297.933	396.55	391.559		753.722		812.854
272.038	313.02	264.811	270.915	302.517	302.666	339.957	297.933	396.55	381.834		752.704		806.97
262.419	303.372	264.811	270.915	292.89	293.04	320.637	288.307	386.826	381.834		745.1		788.989
262.419	293.73	264.811	270.915	292.89	293.04	320.637	278.688	377.109	381.834		742.708		778.977
262.419	293.73	264.811	261.304	292.89	293.04	320.637	230.707	377.109	372.118		742.708		776.838
262.419	284.097	264.811	261.304	292.89	283.421	310.988	221.133	377.109	362.409		741.216		772.758
252.808	274.471	255.2	261.304	283.272	283.421	301.347	221.133	377.109	362.409		723.804		768.973
252.808	274.471	236	251.7	283.272	283.421	301.347	211.566	367.4	362.409		722.739		762.753
252.808	274.471	236	251.7	273.661	273.81	291.713	211.566	357.699	343.013		715.199		761.781
252.808	264.852	236	242.104	264.057	273.81	291.713	202.007	348.005	333.327		705.235		761.781
243.204	264.852	226.411	242.104	264.057	273.81	291.713	202.007	338.318	333.327		701.341		731.769
243.204	264.852	226.411	242.104	264.057	254.61	291.713	192.456	338.318	323.648		695.278		726.777
233.608	264.852	226.411	242.104	254.461	254.61	272.468	192.456	338.318	323.648		695.278		716.789
233.608	264.852	226.411	232.515	254.461	245.021	272.468	192.456	338.318	323.648		695.237		716.789
233.608	264.852	226.411	232.515	244.872	245.021	272.468	182.911	338.318	313.977		695.237		712.851
224.019	255.241	226.411	222.934	244.872	235.44	272.468	182.911	328.639	313.977		693.808		706.808
224.019	255.241	226.411	222.934	235.291	235.44	262.857	182.911	328.639	313.977		692.845		702.894
224.019	255.241	216.83	222.934	235.291	235.44	262.857	182.911	318.968	313.977		691.392		701.827
224.019	255.241	207.256	222.934	235.291	235.44	262.857	173.375	318.968	313.977		685.288		692.946
224.019	255.241	207.256	213.36	235.291	235.44	262.857	173.375	309.304	304.313		675.388		689.224
224.019	245.637	207.256	213.36	235.291	225.866	262.857	173.375	309.304	285.008		665.455		681.906
224.019	245.637	197.689	213.36	225.717	225.866	253.254	173.375	309.304	285.008		664.032		676.914
224.019	245.637	188.13	213.36	225.717	225.866	253.254	173.375	309.304	285.008		654.122		662.016
224.019	245.637	188.13	213.36	216.15	225.866	253.254	163.845	309.304	275.367		645.612		652.083
224.019	236.041	178.579	203.794	216.15	216.3	253.254	163.845	299.648	275.367		645.571		637.166
214.438	236.041	178.579	194.235	206.591	216.3	243.657	163.845	290	275.367		645.571		637.166
214.438	236.041	178.579	194.235	206.591	216.3	243.657	163.845	290	275.367		634.327		629.743
214.438	236.041	178.579	194.235	206.591	206.741	234.069	163.845	290	265.733		633.269		627.249
204.864	236.041	178.579	184.683	206.591	206.741	234.069	163.845	290	265.733		633.269		613.637
204.864	226.452	169.034	184.683	197.04	206.741	234.069	163.845	280.358	265.733		621.97		612.429
204.864	226.452	169.034	184.683	197.04	197.189	234.069	163.845	280.358	256.107		621.97		609.978
195.297	226.452	169.034	175.139	197.04	197.189	234.069	163.845	280.358	256.107		615.907		607.437
195.297	226.452	169.034	175.139	197.04	197.189	224.487	154.323	280.358	256.107		614.562		600.108
195.297	226.452	169.034	175.139	187.495	197.189	224.487	154.323	280.358	246.488		606.021		592.649
195.297	226.452	159.498	175.139	187.495	197.189	224.487	154.323	280.358	236.877		604.692		580.39
195.297	226.452	159.498	175.139	187.495	197.189	224.487	154.323	270.725	236.877		602.206		577.779
185.738	226.452	159.498	175.139	187.495	187.645	224.487	154.323	270.725	236.877		594.829		574.17
185.738	216.871	159.498	165.602	187.495	187.645	224.487	144.808	270.725	236.877		593.709		567.908
185.738	216.871	159.498	165.602	187.495	187.645	214.913	144.808	270.725	236.877		584.974		564.323
185.738	216.871	159.498	165.602	177.958	187.645	214.913	144.808	270.725	227.273		583.839		563.037
185.738	216.871	159.498	165.602	177.958	187.645	214.913	144.808	261.099	227.273		575.276		554.484
185.738	216.871	159.498	165.602	177.958	187.645	214.913	144.808	261.099	227.273		575.276		553.182
185.738	216.871	159.498	165.602	177.958	187.645	205.347	144.808	251.48	227.273		575.276		550.871
185.738	216.871	159.498	165.602	177.958	187.645	205.347	144.808	251.48	227.273		572.617		548.19
185.738	216.871	159.498	165.602	177.958	178.108	205.347	144.808	251.48	217.677		566.554		544.652
185.738	207.297	159.498	165.602	177.958	178.108	205.347	144.808	251.48	217.677		566.554		544.652
176.187	207.297	149.968	165.602	177.958	178.108	205.347	144.808	251.48	217.677		566.554		543.335
176.187	207.297	149.968	165.602	177.958	178.108	205.347	144.808	241.869	217.677		564.121		543.335
176.187	207.297	149.968	165.602	177.958	178.108	205.347	144.808	241.869	217.677		556.707		534.828
176.187	207.297	149.968	156.072	177.958	178.108	205.347	135.301	241.869	217.677		555.605		534.828
176.187	207.297	149.968	156.072	177.958	178.108	205.347	135.301	241.869	217.677		555.605		533.495
176.187	207.297	149.968	156.072	168.429	178.108	195.788	135.301	232.265	208.088		555.605		533.495
176.187	207.297	149.968	156.072	168.429	178.108	195.788	135.301	232.265	208.088		552.93		523.663
166.642	207.297	149.968	156.072	168.429	168.579	195.788	135.301	232.265	208.088		537.035		521.422
166.642	197.73	140.446	156.072	168.429	168.579	195.788	135.301	232.265	208.088		536.994		515.203
166.642	197.73	140.446	156.072	168.429	168.579	195.788	135.301	232.265	208.088		535.964		511.621
166.642	197.73	140.446	156.072	168.429	168.579	195.788	135.301	232.265	208.088		533.274		505.402
166.642	197.73	140.446	156.072	168.429	168.579	195.788	135.301	232.265	208.088		533.274		504.023
166.642	197.73	140.446	146.55	168.429	168.579	186.236	135.301	232.265	208.088		526.006		499.031
166.642	197.73	140.446	146.55	168.429	168.579	186.236	135.301	232.265	208.088		526.006		499.031
166.642	197.73	140.446	146.55	168.429	168.579	186.236	125.801	222.669	208.088		524.778		495.609
166.642	188.171	140.446	146.55	168.429	168.579	186.236	125.801	222.669	198.507		514.962		489.223
166.642	188.171	140.446	146.55	158.907	168.579	186.236	125.801	222.669	198.507		506.562		489.223
166.642	188.171	130.931	146.55	158.907	168.579	186.236	125.801	213.08	198.507		497.785		479.422
157.106	188.171	130.931	146.55	158.907	159.057	176.692	125.801	213.08	198.507		497.785		479.422
157.106	188.171	130.931	146.55	158.907	159.057	176.692	125.801	213.08	198.507		497.785		479.422
157.106	178.62	130.931	146.55	158.907	159.057	176.692	125.801	213.08	198.507		487.992		476.045
157.106	178.62	130.931	146.55	158.907	159.057	176.692	125.801	213.08	198.507		485.559		476.045
157.106	178.62	130.931	146.55	149.392	159.057	167.155	125.801	213.08	188.933		478.207		474.62
157.106	178.62	130.931	137.036	149.392	159.057	167.155	125.801	213.08	188.933		474.492		474.62
157.106	169.075	130.931	137.036	149.392	159.057	167.155	125.801	213.08	188.933		474.492		474.62
157.106	169.075	130.931	137.036	149.392	159.057	167.155	125.801	213.08	188.933		468.429		474.62
157.106	169.075	130.931	137.036	149.392	159.057	167.155	116.308	213.08	188.933		468.429		472.495
157.106	169.075	130.931	137.036	149.392	159.057	167.155	116.308	213.08	188.933		467.466		464.835
147.576	169.075	121.424	137.036	149.392	159.057	167.155	116.308	213.08	179.367		467.466		462.732
147.576	169.075	121.424	137.036	149.392	159.057	167.155	116.308	213.08	179.367		467.316		462.732
147.576	169.075	121.424	137.036	149.392	159.057	167.155	116.308	213.08	179.367		467.316		459.843
147.576	169.075	121.424	137.036	149.392	159.057	167.155	116.308	213.08	179.367		467.316		459.843
147.576	159.539	121.424	127.528	139.885	159.057	157.626	116.308	213.08	179.367		465.996		456.513
147.576	159.539	121.424	127.528	139.885	149.542	157.626	116.308	203.499	169.808		464.722		455.057
147.576	159.539	121.424	127.528	139.885	149.542	157.626	116.308	203.499	169.808		458.659		455.057
147.576	159.539	121.424	127.528	139.885	149.542	157.626	116.308	203.499	169.808		458.659		450.065
147.576	159.539	121.424	127.528	139.885	149.542	157.626	116.308	203.499	169.808		457.711		445.287
147.576	159.539	121.424	127.528	139.885	149.542	157.626	116.308	203.499	169.808		457.561		445.287
147.576	159.539	121.424	127.528	139.885	149.542	157.626	116.308	203.499	169.808		454.959		443.23
147.576	159.539	121.424	127.528	139.885	149.542	148.104	116.308	203.499	169.808		454.959		435.524
147.576	159.539	121.424	127.528	139.885	149.542	148.104	116.308	203.499	169.808		454.959		427.271
138.054	159.539	121.424	127.528	139.885	149.542	148.104	116.308	203.499	169.808		447.814		420.778
138.054	159.539	111.924	127.528	139.885	149.542	148.104	106.823	193.925	169.808		446.463		420.778
138.054	159.539	111.924	127.528	139.885	149.542	148.104	106.823	193.925	169.808		446.463		416.022
138.054	159.539	111.924	127.528	139.885	149.542	148.104	106.823	193.925	160.256		439.141		414.034
138.054	159.539	111.924	127.528	139.885	149.542	148.104	106.823	193.925	160.256		438.074		411.03
138.054	159.539	111.924	118.028	139.885	149.542	148.104	106.823	193.925	160.256		438.074		396.55
138.054	159.539	111.924	118.028	139.885	149.542	148.104	106.823	193.925	160.256		436.708		396.55
138.054	150.009	111.924	118.028	139.885	140.035	148.104	106.823	193.925	160.256		429.353		394.608
138.054	150.009	111.924	118.028	139.885	140.035	138.589	106.823	193.925	160.256		428.492		394.608
138.054	150.009	111.924	118.028	139.885	140.035	138.589	106.823	193.925	160.256		428.492		391.559
138.054	150.009	111.924	118.028	139.885	140.035	138.589	106.823	193.925	160.256		419.654		386.826
138.054	150.009	111.924	118.028	139.885	140.035	138.589	106.823	184.358	160.256		419.613		384.907
138.054	150.009	111.924	118.028	130.385	140.035	138.589	106.823	184.358	160.256		418.618		381.834
138.054	150.009	111.924	118.028	130.385	140.035	138.589	106.823	184.358	160.256		409.923		381.834
128.539	150.009	111.924	118.028	130.385	140.035	138.589	106.823	184.358	160.256		409.881		381.834
128.539	150.009	111.924	118.028	130.385	140.035	138.589	97.3452	184.358	160.256		409.051		377.109
128.539	150.009	111.924	118.028	130.385	140.035	138.589	97.3452	184.358	160.256		407.489		377.109
128.539	150.009	111.924	118.028	130.385	140.035	138.589	97.3452	184.358	160.256		407.489		377.109
128.539	150.009	111.924	118.028	130.385	140.035	138.589	97.3452	184.358	160.256		400.198		377.109
128.539	150.009	111.924	118.028	130.385	140.035	138.589	97.3452	184.358	160.256		400.157		372.118
128.539	150.009	111.924	118.028	130.385	140.035	138.589	97.3452	184.358	150.712		399.342		368.993
128.539	150.009	111.924	118.028	130.385	140.035	129.082	97.3452	184.358	150.712		399.192		368.993
128.539	150.009	102.431	118.028	130.385	140.035	129.082	97.3452	184.358	150.712		399.192		368.993
128.539	150.009	102.431	118.028	130.385	140.035	129.082	97.3452	184.358	150.712		399.192		368.993
128.539	150.009	102.431	118.028	130.385	140.035	129.082	97.3452	174.799	150.712		396.545		368.993
128.539	150.009	102.431	118.028	130.385	140.035	129.082	97.3452	174.799	150.712		390.481		367.4
128.539	150.009	102.431	118.028	130.385	130.535	129.082	97.3452	174.799	150.712		390.481		365.526
128.539	140.487	102.431	118.028	130.385	130.535	129.082	97.3452	174.799	150.712		390.44		365.526
128.539	140.487	102.431	118.028	130.385	130.535	129.082	97.3452	174.799	150.712		389.64		362.409
128.539	140.487	102.431	118.028	130.385	130.535	129.082	97.3452	174.799	150.712		389.64		362.409
128.539	140.487	102.431	108.536	130.385	130.535	129.082	97.3452	174.799	150.712		388.048		362.409
128.539	140.487	102.431	108.536	130.385	130.535	129.082	97.3452	174.799	150.712		388.048		359.307
128.539	140.487	102.431	108.536	130.385	130.535	129.082	97.3452	165.248	150.712		388.048		357.699
119.032	140.487	102.431	108.536	130.385	130.535	129.082	97.3452	165.248	150.712		380.731		349.628
119.032	140.487	102.431	108.536	120.892	130.535	129.082	97.3452	165.248	150.712		380.731		349.628
119.032	140.487	102.431	108.536	120.892	130.535	129.082	97.3452	165.248	150.712		380.731		348.005
119.032	140.487	102.431	108.536	120.892	130.535	129.082	97.3452	165.248	150.712		379.946		343.013
119.032	140.487	102.431	108.536	120.892	130.535	129.082	97.3452	165.248	150.712		379.946		339.957
119.032	130.972	102.431	108.536	120.892	130.535	129.082	97.3452	165.248	150.712		378.339		338.318
119.032	130.972	102.431	108.536	120.892	130.535	119.582	97.3452	165.248	150.712		377.134		338.318
119.032	130.972	102.431	108.536	120.892	130.535	119.582	97.3452	155.703	150.712		371.071		338.318
119.032	130.972	102.431	108.536	120.892	130.535	119.582	97.3452	155.703	150.712		371.03		338.318
119.032	130.972	92.9461	108.536	120.892	130.535	119.582	97.3452	155.703	150.712		370.26		338.318
119.032	130.972	92.9461	108.536	120.892	130.535	119.582	97.3452	155.703	150.712		370.26		336.512
119.032	130.972	92.9461	108.536	120.892	130.535	119.582	97.3452	155.703	150.712		368.638		333.327
119.032	130.972	92.9461	108.536	120.892	121.042	119.582	97.3452	155.703	150.712		361.377		333.327
119.032	130.972	92.9461	108.536	120.892	121.042	119.582	97.3452	155.703	150.712		361.336		328.639
119.032	130.972	92.9461	108.536	120.892	121.042	119.582	97.3452	155.703	141.175		360.581		328.639
119.032	130.972	92.9461	108.536	120.892	121.042	119.582	97.3452	155.703	141.175		360.431		326.856
119.032	130.972	92.9461	108.536	120.892	121.042	119.582	97.3452	155.703	141.175		360.431		323.648
119.032	130.972	92.9461	108.536	120.892	121.042	119.582	97.3452	155.703	141.175		360.431		323.648
119.032	130.972	92.9461	108.536	120.892	121.042	119.582	87.8745	155.703	141.175		357.754		323.648
119.032	130.972	92.9461	108.536	120.892	121.042	119.582	87.8745	155.703	141.175		351.649		320.637
119.032	130.972	92.9461	108.536	120.892	121.042	119.582	87.8745	146.167	141.175		351.649		320.637
119.032	130.972	92.9461	108.536	120.892	121.042	119.582	87.8745	146.167	141.175		351.649		320.637
119.032	130.972	92.9461	99.0505	120.892	121.042	119.582	87.8745	146.167	141.175		351.649		318.968
109.532	130.972	92.9461	99.0505	120.892	121.042	119.582	87.8745	146.167	141.175		350.91		318.968
109.532	130.972	92.9461	99.0505	120.892	121.042	119.582	87.8745	146.167	141.175		350.91		317.207
109.532	130.972	92.9461	99.0505	120.892	121.042	119.582	87.8745	146.167	141.175		350.76		317.207
109.532	130.972	92.9461	99.0505	120.892	121.042	119.582	87.8745	146.167	141.175		350.76		317.207
109.532	130.972	92.9461	99.0505	120.892	121.042	119.582	87.8745	146.167	141.175		349.257		313.977
109.532	130.972	92.9461	99.0505	120.892	121.042	119.582	87.8745	146.167	141.175		348.075		313.977
109.532	130.972	92.9461	99.0505	120.892	121.042	119.582	87.8745	146.167	141.175		341.246		313.977
109.532	121.465	92.9461	99.0505	120.892	121.042	119.582	87.8745	146.167	141.175		341.246		313.977
109.532	121.465	92.9461	99.0505	111.407	121.042	119.582	87.8745	146.167	141.175		341.096		313.977
109.532	121.465	92.9461	99.0505	111.407	121.042	119.582	87.8745	146.167	141.175		341.096		310.988
109.532	121.465	92.9461	99.0505	111.407	121.042	110.089	87.8745	146.167	141.175		341.096		309.304
109.532	121.465	92.9461	99.0505	111.407	121.042	110.089	87.8745	146.167	141.175		339.578		309.304
109.532	121.465	92.9461	99.0505	111.407	121.042	110.089	87.8745	146.167	141.175		332.34		309.304
109.532	121.465	92.9461	99.0505	111.407	121.042	110.089	87.8745	146.167	141.175		332.34		309.304
109.532	121.465	83.4682	99.0505	111.407	121.042	110.089	87.8745	146.167	141.175		332.34		309.304
109.532	121.465	83.4682	99.0505	111.407	121.042	110.089	87.8745	146.167	141.175		332.34		307.566
109.532	121.465	83.4682	99.0505	111.407	121.042	110.089	87.8745	146.167	141.175		331.59		307.566
109.532	121.465	83.4682	99.0505	111.407	121.042	110.089	87.8745	146.167	141.175		331.44		307.566
109.532	121.465	83.4682	99.0505	111.407	121.042	110.089	87.8745	146.167	141.175		331.44		307.566
109.532	121.465	83.4682	99.0505	111.407	121.042	110.089	87.8745	146.167	141.175		329.907		304.313
109.532	121.465	83.4682	99.0505	111.407	121.042	110.089	87.8745	146.167	141.175		329.907		301.347
109.532	121.465	83.4682	99.0505	111.407	121.042	110.089	87.8745	146.167	131.646		329.907		301.347
109.532	121.465	83.4682	99.0505	111.407	111.557	110.089	87.8745	146.167	131.646		328.74		299.648
109.532	121.465	83.4682	99.0505	111.407	111.557	110.089	87.8745	136.637	131.646		328.74		297.933
109.532	121.465	83.4682	99.0505	111.407	111.557	110.089	87.8745	136.637	131.646		322.677		297.933
109.532	121.465	83.4682	99.0505	111.407	111.557	110.089	87.8745	136.637	131.646		322.677		297.933
109.532	111.965	83.4682	99.0505	111.407	111.557	110.089	87.8745	136.637	131.646		322.635		297.933
109.532	111.965	83.4682	99.0505	111.407	111.557	110.089	87.8745	136.637	131.646		322.635		291.713
109.532	111.965	83.4682	99.0505	111.407	111.557	110.089	87.8745	136.637	131.646		322.635		291.713
109.532	111.965	83.4682	99.0505	111.407	111.557	110.089	87.8745	136.637	131.646		321.941		291.713
109.532	111.965	83.4682	99.0505	111.407	111.557	110.089	87.8745	136.637	131.646		321.941		291.713
109.532	111.965	83.4682	99.0505	111.407	111.557	110.089	87.8745	136.637	131.646		321.791		290
109.532	111.965	83.4682	99.0505	111.407	111.557	110.089	87.8745	136.637	131.646		321.791		290
109.532	111.965	83.4682	99.0505	111.407	111.557	110.089	78.4112	136.637	131.646		321.791		290
100.039	111.965	83.4682	89.5726	111.407	111.557	110.089	78.4112	136.637	131.646		321.791		290
100.039	111.965	83.4682	89.5726	101.929	111.557	110.089	78.4112	136.637	131.646		320.243		288.307
100.039	111.965	83.4682	89.5726	101.929	111.557	110.089	78.4112	136.637	131.646		313.02		285.008
100.039	111.965	83.4682	89.5726	101.929	111.557	110.089	78.4112	136.637	131.646		313.02		285.008
100.039	111.965	83.4682	89.5726	101.929	111.557	110.089	78.4112	136.637	131.646		312.15		285.008
100.039	111.965	83.4682	89.5726	101.929	111.557	110.089	78.4112	136.637	131.646		312.15		280.358
100.039	111.965	83.4682	89.5726	101.929	111.557	100.604	78.4112	136.637	131.646		312.15		280.358
100.039	111.965	83.4682	89.5726	101.929	111.557	100.604	78.4112	136.637	131.646		312.15		280.358
100.039	111.965	83.4682	89.5726	101.929	111.557	100.604	78.4112	136.637	131.646		310.587		280.358
100.039	111.965	83.4682	89.5726	101.929	111.557	100.604	78.4112	136.637	131.646		309.435		280.358
100.039	111.965	83.4682	89.5726	101.929	111.557	100.604	78.4112	136.637	131.646		309.435		280.358
100.039	111.965	83.4682	89.5726	101.929	111.557	100.604	78.4112	127.115	131.646		303.372		278.688
100.039	111.965	83.4682	89.5726	101.929	111.557	100.604	78.4112	127.115	131.646		302.666		275.367
100.039	111.965	83.4682	89.5726	101.929	111.557	100.604	78.4112	127.115	131.646		302.666		275.367
100.039	111.965	83.4682	89.5726	101.929	111.557	100.604	78.4112	127.115	131.646		302.666		275.367
100.039	111.965	83.4682	89.5726	101.929	111.557	100.604	78.4112	127.115	131.646		302.517		275.367
100.039	111.965	83.4682	89.5726	101.929	111.557	100.604	78.4112	127.115	131.646		302.517		272.468
100.039	111.965	83.4682	89.5726	101.929	111.557	100.604	78.4112	127.115	122.124		300.938		272.468
100.039	111.965	83.4682	89.5726	101.929	111.557	100.604	78.4112	127.115	122.124		300.938		272.468
100.039	111.965	83.4682	89.5726	101.929	111.557	100.604	78.4112	127.115	122.124		299.794		272.468
100.039	111.965	83.4682	89.5726	101.929	111.557	100.604	78.4112	127.115	122.124		293.73		270.725
100.039	102.473	83.4682	89.5726	101.929	111.557	100.604	78.4112	127.115	122.124		293.73		270.725
100.039	102.473	83.4682	89.5726	101.929	111.557	100.604	78.4112	127.115	122.124		293.689		270.725
100.039	102.473	83.4682	89.5726	101.929	111.557	100.604	78.4112	127.115	122.124		293.689		270.725
100.039	102.473	83.4682	89.5726	101.929	111.557	100.604	78.4112	127.115	122.124		293.689		270.725
100.039	102.473	83.4682	89.5726	101.929	111.557	100.604	78.4112	127.115	122.124		293.04		265.733
100.039	102.473	83.4682	89.5726	101.929	111.557	100.604	78.4112	127.115	122.124		293.04		265.733
100.039	102.473	83.4682	89.5726	101.929	111.557	100.604	78.4112	127.115	122.124		293.04		265.733
100.039	102.473	83.4682	89.5726	101.929	111.557	100.604	78.4112	127.115	122.124		292.89		262.857
100.039	102.473	83.4682	89.5726	101.929	102.079	100.604	78.4112	127.115	122.124		292.89		262.857
100.039	102.473	83.4682	89.5726	101.929	102.079	100.604	78.4112	127.115	122.124		292.89		262.857
100.039	102.473	83.4682	89.5726	101.929	102.079	100.604	78.4112	127.115	122.124		292.89		262.857
100.039	102.473	83.4682	89.5726	101.929	102.079	100.604	78.4112	127.115	122.124		291.297		262.857
100.039	102.473	83.4682	89.5726	101.929	102.079	100.604	78.4112	127.115	122.124		291.297		261.099
100.039	102.473	83.4682	89.5726	101.929	102.079	100.604	78.4112	127.115	122.124		290.16		261.099
100.039	102.473	83.4682	89.5726	101.929	102.079	100.604	78.4112	127.115	122.124		290.16		256.107
100.039	102.473	83.4682	89.5726	101.929	102.079	100.604	78.4112	127.115	122.124		290.16		256.107
100.039	102.473	73.9975	89.5726	101.929	102.079	100.604	78.4112	127.115	122.124		284.097		256.107
100.039	102.473	73.9975	89.5726	101.929	102.079	91.1258	78.4112	127.115	122.124		284.056		253.254
100.039	102.473	73.9975	80.1019	101.929	102.079	91.1258	78.4112	127.115	112.609		284.056		253.254
100.039	102.473	73.9975	80.1019	101.929	102.079	91.1258	78.4112	117.6	112.609		284.056		253.254
100.039	102.473	73.9975	80.1019	101.929	102.079	91.1258	78.4112	117.6	112.609		284.056		253.254
100.039	102.473	73.9975	80.1019	101.929	102.079	91.1258	78.4112	117.6	112.609		284.056		251.48
100.039	102.473	73.9975	80.1019	101.929	102.079	91.1258	78.4112	117.6	112.609		283.421		251.48
90.5541	102.473	73.9975	80.1019	101.929	102.079	91.1258	78.4112	117.6	112.609		283.421		251.48
90.5541	102.473	73.9975	80.1019	101.929	102.079	91.1258	78.4112	117.6	112.609		283.421		251.48
90.5541	102.473	73.9975	80.1019	101.929	102.079	91.1258	78.4112	117.6	112.609		283.272		251.48
90.5541	102.473	73.9975	80.1019	101.929	102.079	91.1258	78.4112	117.6	112.609		283.272		246.488
90.5541	102.473	73.9975	80.1019	101.929	102.079	91.1258	78.4112	117.6	112.609		280.534		243.657
90.5541	102.473	73.9975	80.1019	101.929	102.079	91.1258	78.4112	117.6	112.609		280.534		243.657
90.5541	102.473	73.9975	80.1019	92.4584	102.079	91.1258	78.4112	117.6	112.609		274.471		241.869
90.5541	102.473	73.9975	80.1019	92.4584	102.079	91.1258	78.4112	117.6	112.609		274.471		241.869
90.5541	102.473	73.9975	80.1019	92.4584	102.079	91.1258	78.4112	117.6	112.609		274.471		241.869
90.5541	92.9873	73.9975	80.1019	92.4584	102.079	91.1258	78.4112	117.6	112.609		274.43		241.869
90.5541	92.9873	73.9975	80.1019	92.4584	102.079	91.1258	78.4112	117.6	112.609		274.43		236.877
90.5541	92.9873	73.9975	80.1019	92.4584	102.079	91.1258	78.4112	117.6	112.609		274.43		236.877
90.5541	92.9873	73.9975	80.1019	92.4584	102.079	91.1258	78.4112	117.6	112.609		273.81		236.877
90.5541	92.9873	73.9975	80.1019	92.4584	102.079	91.1258	78.4112	117.6	112.609		273.81		236.877
90.5541	92.9873	73.9975	80.1019	92.4584	102.079	91.1258	78.4112	117.6	112.609		273.81		236.877
90.5541	92.9873	73.9975	80.1019	92.4584	102.079	91.1258	78.4112	117.6	112.609		273.661		234.069
90.5541	92.9873	73.9975	80.1019	92.4584	102.079	91.1258	78.4112	117.6	112.609		272.038		234.069
90.5541	92.9873	73.9975	80.1019	92.4584	102.079	91.1258	78.4112	117.6	112.609		272.038		234.069
90.5541	92.9873	73.9975	80.1019	92.4584	102.079	91.1258	78.4112	117.6	112.609		272.038		234.069
90.5541	92.9873	73.9975	80.1019	92.4584	102.079	91.1258	78.4112	117.6	112.609		272.038		234.069
90.5541	92.9873	73.9975	80.1019	92.4584	102.079	91.1258	78.4112	117.6	112.609		270.915		232.265
90.5541	92.9873	73.9975	80.1019	92.4584	102.079	91.1258	78.4112	117.6	112.609		270.915		232.265
90.5541	92.9873	73.9975	80.1019	92.4584	102.079	91.1258	78.4112	117.6	112.609		270.915		232.265
90.5541	92.9873	73.9975	80.1019	92.4584	102.079	91.1258	68.9552	108.093	112.609		264.852		232.265
90.5541	92.9873	73.9975	80.1019	92.4584	102.079	91.1258	68.9552	108.093	112.609		264.852		232.265
90.5541	92.9873	73.9975	80.1019	92.4584	102.079	91.1258	68.9552	108.093	112.609		264.852		232.265
90.5541	92.9873	73.9975	80.1019	92.4584	102.079	91.1258	68.9552	108.093	112.609		264.852		232.265
90.5541	92.9873	73.9975	80.1019	92.4584	102.079	91.1258	68.9552	108.093	112.609		264.852		232.265
90.5541	92.9873	73.9975	80.1019	92.4584	102.079	91.1258	68.9552	108.093	112.609		264.852		232.265
90.5541	92.9873	73.9975	80.1019	92.4584	102.079	91.1258	68.9552	108.093	112.609		264.811		230.707
90.5541	92.9873	73.9975	80.1019	92.4584	92.6081	91.1258	68.9552	108.093	112.609		264.811		227.273
90.5541	92.9873	73.9975	80.1019	92.4584	92.6081	91.1258	68.9552	108.093	112.609		264.811		227.273
90.5541	92.9873	73.9975	80.1019	92.4584	92.6081	91.1258	68.9552	108.093	112.609		264.811		227.273
90.5541	92.9873	73.9975	80.1019	92.4584	92.6081	91.1258	68.9552	108.093	112.609		264.811		227.273
90.5541	92.9873	73.9975	80.1019	92.4584	92.6081	91.1258	68.9552	108.093	112.609		264.811		227.273
90.5541	92.9873	73.9975	80.1019	92.4584	92.6081	91.1258	68.9552	108.093	112.609		264.811		224.487
90.5541	92.9873	73.9975	80.1019	92.4584	92.6081	91.1258	68.9552	108.093	112.609		264.057		224.487
90.5541	92.9873	73.9975	80.1019	92.4584	92.6081	81.6551	68.9552	108.093	112.609		264.057		224.487
90.5541	92.9873	73.9975	80.1019	92.4584	92.6081	81.6551	68.9552	108.093	112.609		264.057		224.487
90.5541	92.9873	73.9975	80.1019	92.4584	92.6081	81.6551	68.9552	108.093	112.609		262.419		224.487
90.5541	92.9873	73.9975	80.1019	92.4584	92.6081	81.6551	68.9552	108.093	112.609		262.419		224.487
90.5541	92.9873	73.9975	80.1019	92.4584	92.6081	81.6551	68.9552	108.093	112.609		262.419		222.669
90.5541	92.9873	73.9975	80.1019	92.4584	92.6081	81.6551	68.9552	108.093	112.609		262.419		222.669
90.5541	92.9873	73.9975	80.1019	92.4584	92.6081	81.6551	68.9552	108.093	112.609		261.304		222.669
90.5541	92.9873	73.9975	80.1019	92.4584	92.6081	81.6551	68.9552	108.093	112.609		261.304		221.133
90.5541	92.9873	73.9975	80.1019	92.4584	92.6081	81.6551	68.9552	108.093	103.101		261.304		221.133
90.5541	92.9873	73.9975	80.1019	92.4584	92.6081	81.6551	68.9552	108.093	103.101		255.241		217.677
90.5541	92.9873	73.9975	80.1019	92.4584	92.6081	81.6551	68.9552	108.093	103.101		255.241		217.677
81.0762	92.9873	73.9975	80.1019	92.4584	92.6081	81.6551	68.9552	108.093	103.101		255.241		217.677
81.0762	92.9873	73.9975	80.1019	92.4584	92.6081	81.6551	68.9552	108.093	103.101		255.241		217.677
81.0762	92.9873	73.9975	80.1019	92.4584	92.6081	81.6551	68.9552	108.093	103.101		255.241		217.677
81.0762	92.9873	73.9975	80.1019	92.4584	92.6081	81.6551	68.9552	108.093	103.101		255.2		217.677
81.0762	92.9873	73.9975	80.1019	92.4584	92.6081	81.6551	68.9552	108.093	103.101		254.61		217.677
81.0762	92.9873	73.9975	80.1019	92.4584	92.6081	81.6551	68.9552	108.093	103.101		254.61		214.913
81.0762	92.9873	73.9975	80.1019	92.4584	92.6081	81.6551	68.9552	108.093	103.101		254.461		214.913
81.0762	92.9873	64.5342	80.1019	92.4584	92.6081	81.6551	68.9552	108.093	103.101		254.461		214.913
81.0762	92.9873	64.5342	80.1019	92.4584	92.6081	81.6551	68.9552	108.093	103.101		252.808		214.913
81.0762	92.9873	64.5342	70.6386	92.4584	92.6081	81.6551	68.9552	108.093	103.101		252.808		213.08
81.0762	92.9873	64.5342	70.6386	92.4584	92.6081	81.6551	68.9552	108.093	103.101		252.808		213.08
81.0762	92.9873	64.5342	70.6386	92.4584	92.6081	81.6551	68.9552	108.093	103.101		252.808		213.08
81.0762	92.9873	64.5342	70.6386	92.4584	92.6081	81.6551	68.9552	108.093	103.101		251.7		213.08
81.0762	92.9873	64.5342	70.6386	92.4584	92.6081	81.6551	68.9552	108.093	103.101		251.7		213.08
81.0762	92.9873	64.5342	70.6386	92.4584	92.6081	81.6551	68.9552	108.093	103.101		245.637		213.08
81.0762	92.9873	64.5342	70.6386	92.4584	92.6081	81.6551	68.9552	108.093	103.101		245.637		213.08
81.0762	92.9873	64.5342	70.6386	82.9951	92.6081	81.6551	68.9552	108.093	103.101		245.637		213.08
81.0762	92.9873	64.5342	70.6386	82.9951	92.6081	81.6551	68.9552	108.093	103.101		245.637		213.08
81.0762	83.5093	64.5342	70.6386	82.9951	92.6081	81.6551	68.9552	108.093	103.101		245.021		213.08
81.0762	83.5093	64.5342	70.6386	82.9951	92.6081	81.6551	68.9552	98.5931	103.101		245.021		213.08
81.0762	83.5093	64.5342	70.6386	82.9951	92.6081	81.6551	68.9552	98.5931	103.101		244.872		213.08
81.0762	83.5093	64.5342	70.6386	82.9951	92.6081	81.6551	68.9552	98.5931	103.101		244.872		213.08
81.0762	83.5093	64.5342	70.6386	82.9951	92.6081	81.6551	68.9552	98.5931	103.101		243.204		213.08
81.0762	83.5093	64.5342	70.6386	82.9951	92.6081	81.6551	68.9552	98.5931	103.101		243.204		213.08
81.0762	83.5093	64.5342	70.6386	82.9951	92.6081	81.6551	68.9552	98.5931	103.101		242.104		213.08
81.0762	83.5093	64.5342	70.6386	82.9951	92.6081	81.6551	68.9552	98.5931	103.101		242.104		211.566
81.0762	83.5093	64.5342	70.6386	82.9951	92.6081	81.6551	68.9552	98.5931	103.101		242.104		211.566
81.0762	83.5093	64.5342	70.6386	82.9951	92.6081	81.6551	68.9552	98.5931	103.101		242.104		208.088
81.0762	83.5093	64.5342	70.6386	82.9951	92.6081	81.6551	68.9552	98.5931	103.101		236.041		208.088
81.0762	83.5093	64.5342	70.6386	82.9951	92.6081	81.6551	68.9552	98.5931	103.101		236.041		208.088
81.0762	83.5093	64.5342	70.6386	82.9951	92.6081	81.6551	68.9552	98.5931	103.101		236.041		208.088
81.0762	83.5093	64.5342	70.6386	82.9951	92.6081	81.6551	68.9552	98.5931	103.101		236.041		208.088
81.0762	83.5093	64.5342	70.6386	82.9951	92.6081	81.6551	68.9552	98.5931	103.101		236.041		208.088
81.0762	83.5093	64.5342	70.6386	82.9951	92.6081	81.6551	68.9552	98.5931	103.101		236		208.088
81.0762	83.5093	64.5342	70.6386	82.9951	92.6081	81.6551	68.9552	98.5931	103.101		236		208.088
81.0762	83.5093	64.5342	70.6386	82.9951	92.6081	81.6551	68.9552	98.5931	103.101		236		208.088
81.0762	83.5093	64.5342	70.6386	82.9951	92.6081	81.6551	68.9552	98.5931	103.101		235.44		208.088
81.0762	83.5093	64.5342	70.6386	82.9951	92.6081	81.6551	68.9552	98.5931	103.101		235.44		205.347
81.0762	83.5093	64.5342	70.6386	82.9951	92.6081	81.6551	68.9552	98.5931	103.101		235.44		205.347
81.0762	83.5093	64.5342	70.6386	82.9951	92.6081	81.6551	68.9552	98.5931	103.101		235.44		205.347
81.0762	83.5093	64.5342	70.6386	82.9951	92.6081	81.6551	68.9552	98.5931	103.101		235.44		205.347
81.0762	83.5093	64.5342	70.6386	82.9951	92.6081	81.6551	68.9552	98.5931	103.101		235.291		205.347
81.0762	83.5093	64.5342	70.6386	82.9951	92.6081	81.6551	68.9552	98.5931	103.101		235.291		205.347
81.0762	83.5093	64.5342	70.6386	82.9951	92.6081	81.6551	68.9552	98.5931	103.101		235.291		205.347
81.0762	83.5093	64.5342	70.6386	82.9951	92.6081	81.6551	68.9552	98.5931	103.101		235.291		205.347
81.0762	83.5093	64.5342	70.6386	82.9951	92.0424	81.6551	68.9552	98.5931	103.101		235.291		205.347
81.0762	83.5093	64.5342	70.6386	82.9951	83.1447	81.6551	68.9552	98.5931	93.6015		233.608		203.499
81.0762	83.5093	64.5342	70.6386	82.9951	83.1447	81.6551	68.9552	98.5931	93.6015		233.608		203.499
81.0762	83.5093	64.5342	70.6386	82.9951	83.1447	81.6551	68.9552	98.5931	93.6015		233.608		203.499
81.0762	83.5093	64.5342	70.6386	82.9951	83.1447	72.1918	68.9552	98.5931	93.6015		232.515		203.499
81.0762	83.5093	64.5342	70.6386	82.9951	83.1447	72.1918	68.9552	98.5931	93.6015		232.515		203.499
81.0762	83.5093	64.5342	70.6386	82.9951	83.1447	72.1918	68.9552	98.5931	93.6015		226.452		203.499
81.0762	83.5093	64.5342	70.6386	82.9951	83.1447	72.1918	68.9552	98.5931	93.6015		226.452		203.499
81.0762	83.5093	64.5342	70.6386	82.9951	83.1447	72.1918	68.9552	98.5931	93.6015		226.452		203.499
81.0762	83.5093	64.5342	70.6386	82.9951	83.1447	72.1918	68.9552	98.5931	93.6015		226.452		203.499
81.0762	83.5093	64.5342	70.6386	82.9951	83.1447	72.1918	68.9552	98.5931	93.6015		226.452		202.007
81.0762	83.5093	64.5342	70.6386	82.9951	83.1447	72.1918	68.9552	98.5931	93.6015		226.452		202.007
81.0762	83.5093	64.5342	70.6386	82.9951	83.1447	72.1918	68.9552	98.5931	93.6015		226.452		198.507
81.0762	83.5093	64.5342	70.6386	82.9951	83.1447	72.1918	68.9552	98.5931	93.6015		226.452		198.507
81.0762	83.5093	64.5342	70.6386	82.9951	83.1447	72.1918	68.9552	98.5931	93.6015		226.411		198.507
81.0762	83.5093	64.5342	70.6386	82.9951	83.1447	72.1918	59.5064	89.1005	93.6015		226.411		198.507
81.0762	83.5093	64.5342	70.6386	82.9951	83.1447	72.1918	59.5064	89.1005	93.6015		226.411		198.507
81.0762	83.5093	64.5342	70.6386	82.9951	83.1447	72.1918	59.5064	89.1005	93.6015		226.411		198.507
81.0762	83.5093	64.5342	70.6386	82.9951	83.1447	72.1918	59.5064	89.1005	93.6015		226.411		198.507
81.0762	83.5093	64.5342	70.6386	82.9951	83.1447	72.1918	59.5064	89.1005	93.6015		226.411		195.788
81.0762	83.5093	64.5342	70.6386	82.9951	83.1447	72.1918	59.5064	89.1005	93.6015		226.411		195.788
71.6055	83.5093	64.5342	70.6386	82.9951	83.1447	72.1918	59.5064	89.1005	93.6015		225.866		195.788
71.6055	83.5093	64.5342	70.6386	82.9951	83.1447	72.1918	59.5064	89.1005	93.6015		225.866		195.788
71.6055	83.5093	64.5342	70.6386	82.9951	83.1447	72.1918	59.5064	89.1005	93.6015		225.866		195.788
71.6055	83.5093	64.5342	70.6386	82.9951	83.1447	72.1918	59.5064	89.1005	93.6015		225.866		195.788
71.6055	83.5093	64.5342	70.6386	82.9951	83.1447	72.1918	59.5064	89.1005	93.6015		225.717		195.788
71.6055	83.5093	64.5342	70.6386	82.9951	83.1447	72.1918	59.5064	89.1005	93.6015		225.717		193.925
71.6055	83.5093	64.5342	70.6386	82.9951	83.1447	72.1918	59.5064	89.1005	93.6015		224.019		193.925
71.6055	83.5093	64.5342	70.6386	82.9951	83.1447	72.1918	59.5064	89.1005	93.6015		224.019		193.925
71.6055	83.5093	64.5342	70.6386	82.9951	83.1447	72.1918	59.5064	89.1005	93.6015		224.019		193.925
71.6055	83.5093	64.5342	70.6386	82.9951	83.1447	72.1918	59.5064	89.1005	93.6015		224.019		193.925
71.6055	83.5093	64.5342	70.6386	82.9951	83.1447	72.1918	59.5064	89.1005	93.6015		224.019		193.925
71.6055	83.5093	64.5342	70.6386	82.9951	83.1447	72.1918	59.5064	89.1005	93.6015		224.019		193.925
71.6055	83.5093	64.5342	70.6386	82.9951	83.1447	72.1918	59.5064	89.1005	93.6015		224.019		193.925
71.6055	83.5093	64.5342	70.6386	82.9951	83.1447	72.1918	59.5064	89.1005	93.6015		224.019		193.925
71.6055	83.5093	64.5342	70.6386	82.9951	83.1447	72.1918	59.5064	89.1005	93.6015		224.019		193.925
71.6055	83.5093	64.5342	70.6386	82.9951	83.1447	72.1918	59.5064	89.1005	93.6015		224.019		192.456
71.6055	83.5093	64.5342	70.6386	82.9951	83.1447	72.1918	59.5064	89.1005	93.6015		222.934		192.456
71.6055	83.5093	64.5342	70.6386	82.9951	83.1447	72.1918	59.5064	89.1005	93.6015		222.934		192.456
71.6055	83.5093	64.5342	70.6386	82.9951	83.1447	72.1918	59.5064	89.1005	93.6015		222.934		188.933
71.6055	76.8432	64.5342	70.6386	82.9951	83.1447	72.1918	59.5064	89.1005	93.6015		222.934		188.933
71.6055	74.0387	64.5342	61.1825	82.9951	83.1447	72.1918	59.5064	89.1005	93.6015		216.871		188.933
71.6055	74.0387	64.5342	61.1825	82.9951	83.1447	72.1918	59.5064	89.1005	93.6015		216.871		188.933
71.6055	74.0387	64.5342	61.1825	82.9951	83.1447	72.1918	59.5064	89.1005	93.6015		216.871		188.933
71.6055	74.0387	64.5342	61.1825	82.9951	83.1447	72.1918	59.5064	89.1005	93.6015		216.871		188.933
71.6055	74.0387	64.5342	61.1825	82.9951	83.1447	72.1918	59.5064	89.1005	93.6015		216.871		186.236
71.6055	74.0387	64.5342	61.1825	82.9951	83.1447	72.1918	59.5064	89.1005	93.6015		216.871		186.236
71.6055	74.0387	55.0781	61.1825	82.9951	83.1447	72.1918	59.5064	89.1005	93.6015		216.871		186.236
71.6055	74.0387	55.0781	61.1825	82.9951	83.1447	72.1918	59.5064	89.1005	93.6015		216.871		186.236
71.6055	74.0387	55.0781	61.1825	82.9951	83.1447	72.1918	59.5064	89.1005	93.6015		216.83		186.236
71.6055	74.0387	55.0781	61.1825	73.5391	83.1447	72.1918	59.5064	89.1005	93.6015		216.3		186.236
71.6055	74.0387	55.0781	61.1825	73.5391	83.1447	72.1918	59.5064	89.1005	93.6015		216.3		184.358
71.6055	74.0387	55.0781	61.1825	73.5391	83.1447	72.1918	59.5064	89.1005	93.6015		216.3		184.358
71.6055	74.0387	55.0781	61.1825	73.5391	83.1447	72.1918	59.5064	89.1005	93.6015		216.15		184.358
71.6055	74.0387	55.0781	61.1825	73.5391	83.1447	72.1918	59.5064	89.1005	93.6015		216.15		184.358
71.6055	74.0387	55.0781	61.1825	73.5391	83.1447	72.1918	59.5064	89.1005	93.6015		214.438		184.358
71.6055	74.0387	55.0781	61.1825	73.5391	83.1447	72.1918	59.5064	89.1005	93.6015		214.438		184.358
71.6055	74.0387	55.0781	61.1825	73.5391	83.1447	72.1918	59.5064	89.1005	93.6015		214.438		184.358
71.6055	74.0387	55.0781	61.1825	73.5391	83.1447	72.1918	59.5064	89.1005	93.6015		213.36		184.358
71.6055	74.0387	55.0781	61.1825	73.5391	83.1447	72.1918	59.5064	89.1005	93.6015		213.36		184.358
71.6055	74.0387	55.0781	61.1825	73.5391	83.1447	72.1918	59.5064	89.1005	93.6015		213.36		184.358
71.6055	74.0387	55.0781	61.1825	73.5391	83.1447	72.1918	59.5064	89.1005	84.1089		213.36		184.358
71.6055	74.0387	55.0781	61.1825	73.5391	83.1447	72.1918	59.5064	89.1005	84.1089		213.36		184.358
71.6055	74.0387	55.0781	61.1825	73.5391	83.1447	72.1918	59.5064	89.1005	84.1089		207.297		184.358
71.6055	74.0387	55.0781	61.1825	73.5391	83.1447	72.1918	59.5064	89.1005	84.1089		207.297		182.911
71.6055	74.0387	55.0781	61.1825	73.5391	83.1447	72.1918	59.5064	89.1005	84.1089		207.297		182.911
71.6055	74.0387	55.0781	61.1825	73.5391	83.1447	72.1918	59.5064	89.1005	84.1089		207.297		182.911
71.6055	74.0387	55.0781	61.1825	73.5391	83.1447	72.1918	59.5064	89.1005	84.1089		207.297		182.911
71.6055	74.0387	55.0781	61.1825	73.5391	83.1447	72.1918	59.5064	89.1005	84.1089		207.297		179.367
71.6055	74.0387	55.0781	61.1825	73.5391	83.1447	72.1918	59.5064	89.1005	84.1089		207.297		179.367
71.6055	74.0387	55.0781	61.1825	73.5391	83.1447	72.1918	59.5064	89.1005	84.1089		207.297		179.367
71.6055	74.0387	55.0781	61.1825	73.5391	83.1447	72.1918	59.5064	89.1005	84.1089		207.297		179.367
71.6055	74.0387	55.0781	61.1825	73.5391	83.1447	72.1918	59.5064	89.1005	84.1089		207.256		179.367
71.6055	74.0387	55.0781	61.1825	73.5391	83.1447	72.1918	59.5064	89.1005	84.1089		207.256		176.692
71.6055	74.0387	55.0781	61.1825	73.5391	73.6887	72.1918	59.5064	89.1005	84.1089		207.256		176.692
71.6055	74.0387	55.0781	61.1825	73.5391	73.6887	72.1918	59.5064	89.1005	84.1089		206.741		176.692
71.6055	74.0387	55.0781	61.1825	73.5391	73.6887	72.1918	59.5064	89.1005	84.1089		206.741		176.692
71.6055	74.0387	55.0781	61.1825	73.5391	73.6887	72.1918	59.5064	89.1005	84.1089		206.741		174.799
71.6055	74.0387	55.0781	61.1825	73.5391	73.6887	72.1918	59.5064	89.1005	84.1089		206.591		174.799
71.6055	74.0387	55.0781	61.1825	73.5391	73.6887	72.1918	59.5064	89.1005	84.1089		206.591		174.799
71.6055	74.0387	55.0781	61.1825	73.5391	73.6887	72.1918	59.5064	89.1005	84.1089		206.591		174.799
71.6055	74.0387	55.0781	61.1825	73.5391	73.6887	72.1918	59.5064	89.1005	84.1089		206.591		174.799
71.6055	74.0387	55.0781	61.1825	73.5391	73.6887	72.1918	59.5064	89.1005	84.1089		204.864		174.799
71.6055	74.0387	55.0781	61.1825	73.5391	73.6887	72.1918	59.5064	89.1005	84.1089		204.864		174.799
71.6055	74.0387	55.0781	61.1825	73.5391	73.6887	72.1918	59.5064	89.1005	84.1089		204.864		174.799
71.6055	74.0387	55.0781	61.1825	73.5391	73.6887	72.1918	59.5064	79.6152	84.1089		203.794		173.375
71.6055	74.0387	55.0781	61.1825	73.5391	73.6887	72.1918	59.5064	79.6152	84.1089		197.73		173.375
71.6055	74.0387	55.0781	61.1825	73.5391	73.6887	72.1918	59.5064	79.6152	84.1089		197.73		173.375
71.6055	74.0387	55.0781	61.1825	73.5391	73.6887	72.1918	59.5064	79.6152	84.1089		197.73		173.375
71.6055	74.0387	55.0781	61.1825	73.5391	73.6887	72.1918	59.5064	79.6152	84.1089		197.73		173.375
71.6055	74.0387	55.0781	61.1825	73.5391	73.6887	72.1918	59.5064	79.6152	84.1089		197.73		169.808
71.6055	74.0387	55.0781	61.1825	73.5391	73.6887	72.1918	59.5064	79.6152	84.1089		197.73		169.808
71.6055	74.0387	55.0781	61.1825	73.5391	73.6887	72.1918	59.5064	79.6152	84.1089		197.73		169.808
71.6055	74.0387	55.0781	61.1825	73.5391	73.6887	72.1918	59.5064	79.6152	84.1089		197.689		169.808
71.6055	74.0387	55.0781	61.1825	73.5391	73.6887	72.1918	59.5064	79.6152	84.1089		197.189		169.808
71.6055	74.0387	55.0781	61.1825	73.5391	73.6887	72.1918	59.5064	79.6152	84.1089		197.189		169.808
71.6055	74.0387	55.0781	61.1825	73.5391	73.6887	72.1918	59.5064	79.6152	84.1089		197.189		169.808
71.6055	74.0387	55.0781	61.1825	73.5391	73.6887	72.1918	59.5064	79.6152	84.1089		197.189		169.808
71.6055	74.0387	55.0781	61.1825	73.5391	73.6887	72.1918	59.5064	79.6152	84.1089		197.189		169.808
71.6055	74.0387	55.0781	61.1825	73.5391	73.6887	72.1918	59.5064	79.6152	84.1089		197.189		169.808
71.6055	74.0387	55.0781	61.1825	73.5391	73.6887	72.1918	59.5064	79.6152	84.1089		197.04		169.808
71.6055	74.0387	55.0781	61.1825	73.5391	73.6887	62.7357	59.5064	79.6152	84.1089		197.04		167.155
71.6055	74.0387	55.0781	61.1825	73.5391	73.6887	62.7357	59.5064	79.6152	84.1089		197.04		167.155
71.6055	74.0387	55.0781	61.1825	73.5391	73.6887	62.7357	59.5064	79.6152	84.1089		197.04		167.155
71.6055	74.0387	55.0781	61.1825	73.5391	73.6887	62.7357	59.5064	79.6152	84.1089		195.297		167.155
71.6055	74.0387	55.0781	61.1825	73.5391	73.6887	62.7357	59.5064	79.6152	84.1089		195.297		167.155
71.6055	74.0387	55.0781	61.1825	73.5391	73.6887	62.7357	59.5064	79.6152	84.1089		195.297		167.155
71.6055	74.0387	55.0781	61.1825	73.5391	73.6887	62.7357	59.5064	79.6152	84.1089		195.297		167.155
71.6055	74.0387	55.0781	61.1825	73.5391	73.6887	62.7357	59.5064	79.6152	84.1089		195.297		167.155
71.6055	74.0387	55.0781	61.1825	73.5391	73.6887	62.7357	59.5064	79.6152	84.1089		194.235		167.155
71.6055	74.0387	55.0781	61.1825	73.5391	73.6887	62.7357	59.5064	79.6152	84.1089		194.235		167.155
71.6055	74.0387	55.0781	61.1825	73.5391	73.6887	62.7357	59.5064	79.6152	84.1089		194.235		165.248
71.6055	74.0387	55.0781	61.1825	73.5391	73.6887	62.7357	59.5064	79.6152	84.1089		188.171		165.248
71.6055	74.0387	55.0781	61.1825	73.5391	73.6887	62.7357	59.5064	79.6152	84.1089		188.171		165.248
71.6055	74.0387	55.0781	61.1825	73.5391	73.6887	62.7357	59.5064	79.6152	84.1089		188.171		165.248
71.6055	74.0387	55.0781	61.1825	73.5391	73.6887	62.7357	59.5064	79.6152	84.1089		188.171		165.248
71.6055	74.0387	55.0781	61.1825	73.5391	73.6887	62.7357	59.5064	79.6152	84.1089		188.171		165.248
71.6055	74.0387	55.0781	61.1825	73.5391	73.6887	62.7357	59.5064	79.6152	84.1089		188.13		165.248
71.6055	74.0387	55.0781	61.1825	73.5391	73.6887	62.7357	59.5064	79.6152	84.1089		188.13		165.248
71.6055	74.0387	55.0781	61.1825	73.5391	73.6887	62.7357	59.5064	79.6152	84.1089		187.645		163.845
71.6055	74.0387	55.0781	61.1825	73.5391	73.6887	62.7357	59.5064	79.6152	84.1089		187.645		163.845
71.6055	74.0387	55.0781	61.1825	73.5391	73.6887	62.7357	59.5064	79.6152	84.1089		187.645		163.845
71.6055	74.0387	55.0781	61.1825	73.5391	73.6887	62.7357	59.5064	79.6152	84.1089		187.645		163.845
71.6055	74.0387	55.0781	61.1825	73.5391	73.6887	62.7357	59.5064	79.6152	84.1089		187.645		163.845
71.6055	74.0387	55.0781	61.1825	73.5391	73.6887	62.7357	59.5064	79.6152	84.1089		187.645		163.845
71.6055	74.0387	55.0781	61.1825	73.5391	73.6887	62.7357	59.5064	79.6152	84.1089		187.645		163.845
71.6055	74.0387	55.0781	61.1825	73.5391	73.6887	62.7357	59.5064	79.6152	84.1089		187.645		163.845
62.1422	74.0387	55.0781	61.1825	73.5391	73.6887	62.7357	59.5064	79.6152	84.1089		187.495		163.845
62.1422	74.0387	55.0781	61.1825	73.5391	73.6887	62.7357	59.5064	79.6152	84.1089		187.495		160.256
62.1422	64.5753	55.0781	61.1825	73.5391	73.6887	62.7357	59.5064	79.6152	84.1089		187.495		160.256
62.1422	64.5753	55.0781	61.1825	73.5391	73.6887	62.7357	59.5064	79.6152	84.1089		187.495		160.256
62.1422	64.5753	55.0781	61.1825	73.5391	73.6887	62.7357	59.5064	79.6152	84.1089		187.495		160.256
62.1422	64.5753	55.0781	61.1825	73.5391	73.6887	62.7357	59.5064	79.6152	84.1089		187.495		160.256
62.1422	64.5753	55.0781	61.1825	73.5391	73.6887	62.7357	59.5064	79.6152	84.1089		185.738		160.256
62.1422	64.5753	55.0781	61.1825	73.5391	73.6887	62.7357	59.5064	79.6152	84.1089		185.738		160.256
62.1422	64.5753	55.0781	61.1825	73.5391	73.6887	62.7357	59.5064	79.6152	84.1089		185.738		160.256
62.1422	64.5753	55.0781	61.1825	73.5391	73.6887	62.7357	59.5064	79.6152	84.1089		185.738		160.256
62.1422	64.5753	55.0781	61.1825	73.5391	73.6887	62.7357	59.5064	79.6152	84.1089		185.738		160.256
62.1422	64.5753	55.0781	61.1825	73.5391	73.6887	62.7357	59.5064	79.6152	84.1089		185.738		160.256
62.1422	64.5753	55.0781	51.7338	73.5391	73.6887	62.7357	59.5064	79.6152	84.1089		185.738		160.256
62.1422	64.5753	55.0781	51.7338	73.5391	73.6887	62.7357	59.5064	79.6152	74.6236		185.738		160.256
62.1422	64.5753	55.0781	51.7338	73.5391	73.6887	62.7357	59.5064	79.6152	74.6236		185.738		160.256
62.1422	64.5753	55.0781	51.7338	73.5391	73.6887	62.7357	59.5064	79.6152	74.6236		185.738		160.256
62.1422	64.5753	55.0781	51.7338	73.5391	73.6887	62.7357	59.5064	79.6152	74.6236		184.683		160.256
62.1422	64.5753	55.0781	51.7338	73.5391	73.6887	62.7357	59.5064	79.6152	74.6236		184.683		160.256
62.1422	64.5753	55.0781	51.7338	73.5391	73.6887	62.7357	59.5064	79.6152	74.6236		184.683		157.626
62.1422	64.5753	55.0781	51.7338	73.5391	73.6887	62.7357	59.5064	79.6152	74.6236		178.62		157.626
62.1422	64.5753	55.0781	51.7338	73.5391	73.6887	62.7357	59.5064	79.6152	74.6236		178.62		157.626
62.1422	64.5753	55.0781	51.7338	73.5391	73.6887	62.7357	59.5064	79.6152	74.6236		178.62		157.626
62.1422	64.5753	55.0781	51.7338	64.0903	73.6887	62.7357	59.5064	79.6152	74.6236		178.62		157.626
62.1422	64.5753	55.0781	51.7338	64.0903	73.6887	62.7357	59.5064	79.6152	74.6236		178.579		157.626
62.1422	64.5753	55.0781	51.7338	64.0903	73.6887	62.7357	59.5064	79.6152	74.6236		178.579		157.626
62.1422	64.5753	55.0781	51.7338	64.0903	73.6887	62.7357	59.5064	79.6152	74.6236		178.579		155.703
62.1422	64.5753	55.0781	51.7338	64.0903	73.6887	62.7357	59.5064	79.6152	74.6236		178.579		155.703
62.1422	64.5753	55.0781	51.7338	64.0903	73.6887	62.7357	59.5064	79.6152	74.6236		178.579		155.703
62.1422	64.5753	55.0781	51.7338	64.0903	73.6887	62.7357	59.5064	79.6152	74.6236		178.108		155.703
62.1422	64.5753	55.0781	51.7338	64.0903	73.6887	62.7357	59.5064	79.6152	74.6236		178.108		155.703
62.1422	64.5753	55.0781	51.7338	64.0903	73.6887	62.7357	59.5064	79.6152	74.6236		178.108		155.703
62.1422	64.5753	55.0781	51.7338	64.0903	73.6887	62.7357	59.5064	79.6152	74.6236		178.108		155.703
62.1422	64.5753	55.0781	51.7338	64.0903	73.6887	62.7357	59.5064	79.6152	74.6236		178.108		155.703
62.1422	64.5753	55.0781	51.7338	64.0903	73.6887	62.7357	59.5064	79.6152	74.6236		178.108		155.703
62.1422	64.5753	55.0781	51.7338	64.0903	73.6887	62.7357	59.5064	79.6152	74.6236		178.108		155.703
62.1422	64.5753	55.0781	51.7338	64.0903	73.6887	62.7357	59.5064	79.6152	74.6236		178.108		155.703
62.1422	64.5753	55.0781	51.7338	64.0903	73.6887	62.7357	50.065	79.6152	74.6236		178.108		155.703
62.1422	64.5753	55.0781	51.7338	64.0903	73.6887	62.7357	50.065	79.6152	74.6236		177.958		155.703
62.1422	64.5753	55.0781	51.7338	64.0903	73.6887	62.7357	50.065	79.6152	74.6236		177.958		154.323
62.1422	64.5753	55.0781	51.7338	64.0903	73.6887	62.7357	50.065	79.6152	74.6236		177.958		154.323
62.1422	64.5753	55.0781	51.7338	64.0903	73.6887	62.7357	50.065	70.1372	74.6236		177.958		154.323
62.1422	64.5753	55.0781	51.7338	64.0903	73.6887	62.7357	50.065	70.1372	74.6236		177.958		154.323
62.1422	64.5753	55.0781	51.7338	64.0903	73.6887	62.7357	50.065	70.1372	74.6236		177.958		154.323
62.1422	64.5753	55.0781	51.7338	64.0903	73.6887	62.7357	50.065	70.1372	74.6236		177.958		150.712
62.1422	64.5753	55.0781	51.7338	64.0903	73.6887	62.7357	50.065	70.1372	74.6236		177.958		150.712
62.1422	64.5753	55.0781	51.7338	64.0903	73.6887	62.7357	50.065	70.1372	74.6236		177.958		150.712
62.1422	64.5753	55.0781	51.7338	64.0903	73.6887	62.7357	50.065	70.1372	74.6236		177.958		150.712
62.1422	64.5753	55.0781	51.7338	64.0903	73.6887	62.7357	50.065	70.1372	74.6236		177.958		150.712
62.1422	64.5753	55.0781	51.7338	64.0903	73.6887	62.7357	50.065	70.1372	74.6236		177.958		150.712
62.1422	64.5753	55.0781	51.7338	64.0903	73.6887	62.7357	50.065	70.1372	74.6236		176.187		150.712
62.1422	64.5753	55.0781	51.7338	64.0903	73.6887	62.7357	50.065	70.1372	74.6236		176.187		150.712
62.1422	64.5753	55.0781	51.7338	64.0903	73.6887	62.7357	50.065	70.1372	74.6236		176.187		150.712
62.1422	64.5753	55.0781	51.7338	64.0903	73.6887	62.7357	50.065	70.1372	74.6236		176.187		150.712
62.1422	64.5753	55.0781	51.7338	64.0903	73.6887	62.7357	50.065	70.1372	74.6236		176.187		150.712
62.1422	64.5753	55.0781	51.7338	64.0903	73.6887	62.7357	50.065	70.1372	74.6236		176.187		150.712
62.1422	64.5753	55.0781	51.7338	64.0903	73.6887	62.7357	50.065	70.1372	74.6236		176.187		150.712
62.1422	64.5753	55.0781	51.7338	64.0903	73.6887	62.7357	50.065	70.1372	74.6236		175.139		150.712
62.1422	64.5753	55.0781	51.7338	64.0903	73.6887	62.7357	50.065	70.1372	74.6236		175.139		150.712
62.1422	64.5753	55.0781	51.7338	64.0903	73.6887	62.7357	50.065	70.1372	74.6236		175.139		150.712
62.1422	64.5753	55.0781	51.7338	64.0903	73.6887	62.7357	50.065	70.1372	74.6236		175.139		150.712
62.1422	64.5753	55.0781	51.7338	64.0903	73.6887	62.7357	50.065	70.1372	74.6236		175.139		150.712
62.1422	64.5753	55.0781	51.7338	64.0903	73.6887	62.7357	50.065	70.1372	74.6236		175.139		150.712
62.1422	64.5753	55.0781	51.7338	64.0903	73.6887	62.7357	50.065	70.1372	74.6236		169.075		150.712
62.1422	64.5753	55.0781	51.7338	64.0903	73.6887	62.7357	50.065	70.1372	74.6236		169.075		150.712
62.1422	64.5753	55.0781	51.7338	64.0903	73.6887	62.7357	50.065	70.1372	74.6236		169.075		150.712
62.1422	64.5753	55.0781	51.7338	64.0903	73.6887	62.7357	50.065	70.1372	74.6236		169.075		150.712
62.1422	64.5753	55.0781	51.7338	64.0903	73.6887	62.7357	50.065	70.1372	74.6236		169.075		150.712
62.1422	64.5753	55.0781	51.7338	64.0903	64.2399	62.7357	50.065	70.1372	74.6236		169.075		150.712
62.1422	64.5753		51.7338	64.0903	64.2399	62.7357	50.065	70.1372	74.6236		169.075		150.712
62.1422	64.5753		51.7338	64.0903	64.2399	62.7357	50.065	70.1372	74.6236		169.075		150.712
62.1422	64.5753		51.7338	64.0903	64.2399	62.7357	50.065	70.1372	74.6236		169.034		148.104
62.1422	64.5753		51.7338	64.0903	64.2399	62.7357	50.065	70.1372	74.6236		169.034		148.104
62.1422	64.5753		51.7338	64.0903	64.2399	62.7357	50.065	70.1372	74.6236		169.034		148.104
62.1422	64.5753		51.7338	64.0903	64.2399	62.7357	50.065	70.1372	74.6236		169.034		148.104
62.1422	64.5753		51.7338	64.0903	64.2399	62.7357	50.065	70.1372	74.6236		169.034		148.104
62.1422	64.5753		51.7338	64.0903	64.2399	62.7357	50.065	70.1372	74.6236		168.579		148.104
62.1422	64.5753		51.7338	64.0903	64.2399	62.7357	50.065	70.1372	74.6236		168.579		148.104
62.1422	64.5753		51.7338	64.0903	64.2399	62.7357	50.065	70.1372	74.6236		168.579		148.104
62.1422	64.5753		51.7338	64.0903	64.2399	62.7357	50.065	70.1372	74.6236		168.579		148.104
62.1422	64.5753		51.7338	64.0903	64.2399	62.7357	50.065	70.1372	74.6236		168.579		148.104
62.1422	64.5753		51.7338	64.0903	64.2399	62.7357	50.065	70.1372	74.6236		168.579		146.167
62.1422	64.5753		51.7338	64.0903	64.2399	62.7357	50.065	70.1372	74.6236		168.579		146.167
62.1422	64.5753		51.7338	64.0903	64.2399	62.7357	50.065	70.1372	74.6236		168.579		146.167
62.1422	64.5753		51.7338	64.0903	64.2399	62.7357	50.065	70.1372	74.6236		168.579		146.167
62.1422	64.5753		51.7338	64.0903	64.2399	62.7357	50.065	70.1372	74.6236		168.579		146.167
62.1422	64.5753		51.7338	64.0903	64.2399	62.7357	50.065	70.1372	74.6236		168.579		146.167
62.1422	64.5753		51.7338	64.0903	64.2399	62.7357	50.065	70.1372	74.6236		168.429		146.167
62.1422	64.5753		51.7338	64.0903	64.2399	62.7357	50.065	70.1372	74.6236		168.429		146.167
62.1422	64.5753		51.7338	64.0903	64.2399	62.7357	50.065	70.1372	74.6236		168.429		146.167
62.1422	64.5753		51.7338	64.0903	64.2399	62.7357	50.065	70.1372	74.6236		168.429		146.167
62.1422	64.5753		51.7338	64.0903	64.2399	62.7357	50.065	70.1372	74.6236		168.429		146.167
62.1422	64.5753		51.7338	64.0903	64.2399	62.7357	50.065	70.1372	74.6236		168.429		146.167
62.1422	64.5753		51.7338	64.0903	64.2399	62.7357	50.065	70.1372	74.6236		168.429		146.167
62.1422	64.5753		51.7338	64.0903	64.2399	62.7357	50.065	70.1372	74.6236		168.429		146.167
62.1422	64.5753		51.7338	64.0903	64.2399	62.7357	50.065	70.1372	74.6236		168.429		146.167
62.1422	64.5753		51.7338	64.0903	64.2399	62.7357	50.065	70.1372	74.6236		168.429		146.167
62.1422	64.5753		51.7338	64.0903	64.2399	62.7357	50.065	70.1372	74.6236		168.429		146.167
62.1422	64.5753		51.7338	64.0903	64.2399	62.7357	50.065	70.1372	74.6236		166.642		146.167
62.1422	64.5753		51.7338	64.0903	64.2399	62.7357	50.065	70.1372	74.6236		166.642		146.167
62.1422	64.5753		51.7338	64.0903	64.2399	62.7357	50.065	70.1372	74.6236		166.642		146.167
62.1422	64.5753		51.7338	64.0903	64.2399	62.7357	50.065	70.1372	74.6236		166.642		146.167
62.1422	64.5753		51.7338	64.0903	64.2399	62.7357	50.065	70.1372	74.6236		166.642		146.167
62.1422	64.5753		51.7338	64.0903	64.2399	62.7357	50.065	70.1372	74.6236		166.642		146.167
62.1422	64.5753		51.7338	64.0903	64.2399	62.7357	50.065	70.1372	74.6236		166.642		146.167
62.1422	64.5753		51.7338	64.0903	64.2399	62.7357	50.065	70.1372	74.6236		166.642		146.167
62.1422	64.5753		51.7338	64.0903	64.2399	62.7357	50.065	70.1372	74.6236		166.642		146.167
62.1422	64.5753		51.7338	64.0903	64.2399	62.7357	50.065	70.1372	74.6236		166.642		144.808
62.1422	64.5753		51.7338	64.0903	64.2399	62.7357	50.065	70.1372	74.6236		166.642		144.808
62.1422	64.5753		51.7338	64.0903	64.2399	62.7357	50.065	70.1372	74.6236		165.602		144.808
62.1422	64.5753		51.7338	64.0903	64.2399	62.7357	50.065	70.1372	74.6236		165.602		144.808
62.1422	64.5753		51.7338	64.0903	64.2399	62.7357	50.065	70.1372	74.6236		165.602		144.808
62.1422	64.5753		51.7338	64.0903	64.2399	62.7357	50.065	70.1372	74.6236		165.602		144.808
62.1422	64.5753		51.7338	64.0903	64.2399	62.7357	50.065	70.1372	74.6236		165.602		144.808
62.1422	64.5753		51.7338	64.0903	64.2399	62.7357	50.065	70.1372	74.6236		165.602		144.808
62.1422	64.5753		51.7338	64.0903	64.2399	62.7357	50.065	70.1372	74.6236		165.602		144.808
62.1422	64.5753		51.7338	64.0903	64.2399	62.7357	50.065	70.1372	74.6236		165.602		144.808
62.1422	64.5753		51.7338	64.0903	64.2399	62.7357	50.065	70.1372	74.6236		165.602		144.808
62.1422	64.5753		51.7338	64.0903	64.2399	62.7357	50.065	70.1372	74.6236		165.602		144.808
62.1422	64.5753		51.7338	64.0903	64.2399	62.7357	50.065	70.1372	74.6236		165.602		141.175
62.1422	64.5753		51.7338	64.0903	64.2399	62.7357	50.065	70.1372	74.6236		165.602		141.175
62.1422	64.5753		51.7338	64.0903	64.2399	62.7357	50.065	70.1372	74.6236		159.539		141.175
62.1422	64.5753		51.7338	64.0903	64.2399	53.287	50.065	70.1372	74.6236		159.539		141.175
62.1422	64.5753		51.7338	64.0903	64.2399	53.287	50.065	70.1372	74.6236		159.539		141.175
62.1422	64.5753		51.7338	64.0903	64.2399	53.287	50.065	70.1372	74.6236		159.539		141.175
62.1422	64.5753		51.7338	64.0903	64.2399	53.287	50.065	70.1372	74.6236		159.539		141.175
62.1422	64.5753		51.7338	64.0903	64.2399	53.287	50.065	70.1372	74.6236		159.539		141.175
62.1422	64.5753		51.7338	64.0903	64.2399	53.287	50.065	70.1372	74.6236		159.539		141.175
62.1422	64.5753		51.7338	64.0903	64.2399	53.287	50.065	70.1372	74.6236		159.539		141.175
62.1422	64.5753		51.7338	64.0903	64.2399	53.287	50.065	70.1372	74.6236		159.539		141.175
62.1422	64.5753		51.7338	64.0903	64.2399	53.287	50.065	70.1372	74.6236		159.539		141.175
62.1422	64.5753		51.7338	64.0903	64.2399	53.287	50.065	70.1372	65.1456		159.539		141.175
62.1422	64.5753		51.7338	64.0903	64.2399	53.287	50.065	70.1372	65.1456		159.539		141.175
62.1422	64.5753		51.7338	64.0903	64.2399	53.287	50.065	70.1372	65.1456		159.539		141.175
62.1422	64.5753		51.7338	64.0903	64.2399	53.287	50.065	70.1372	65.1456		159.539		141.175
62.1422	64.5753		51.7338	64.0903	64.2399	53.287	50.065	70.1372	65.1456		159.539		141.175
62.1422	64.5753		51.7338	64.0903	64.2399	53.287	50.065	70.1372	65.1456		159.539		141.175
62.1422	64.5753		51.7338	64.0903	64.2399	53.287	50.065	70.1372	65.1456		159.498		141.175
62.1422	64.5753		51.7338	64.0903	64.2399	53.287	50.065	70.1372	65.1456		159.498		141.175
62.1422	64.5753		51.7338	64.0903	64.2399	53.287	50.065	70.1372	65.1456		159.498		141.175
62.1422	64.5753		51.7338	64.0903	64.2399	53.287	50.065	70.1372	65.1456		159.498		141.175
62.1422	64.5753		51.7338	64.0903	64.2399	53.287	50.065	70.1372	65.1456		159.498		141.175
62.1422	64.5753		51.7338	64.0903	64.2399	53.287	50.065	70.1372	65.1456		159.498		141.175
62.1422	64.5753		51.7338	64.0903	64.2399	53.287	50.065	70.1372	65.1456		159.498		141.175
62.1422	64.5753		51.7338	64.0903	64.2399	53.287	50.065	70.1372	65.1456		159.498		141.175
62.1422	64.5753		51.7338	64.0903	64.2399	53.287	50.065	70.1372	65.1456		159.498		141.175
62.1422	64.5753		51.7338	64.0903	64.2399	53.287	50.065	70.1372	65.1456		159.498		141.175
62.1422	64.5753		51.7338	64.0903	64.2399	53.287	50.065	70.1372	65.1456		159.498		141.175
62.1422	64.5753		51.7338	64.0903	64.2399	53.287	50.065	70.1372	65.1456		159.498		141.175
62.1422	64.5753		51.7338	64.0903	64.2399	53.287	50.065	70.1372	65.1456		159.057		138.589
52.6861	64.5753		51.7338	64.0903	64.2399	53.287	50.065	70.1372	65.1456		159.057		138.589
52.6861	64.5753		51.7338	64.0903	64.2399	53.287	50.065	70.1372	65.1456		159.057		138.589
52.6861	64.5753		51.7338	64.0903	64.2399	53.287	50.065	70.1372	65.1456		159.057		138.589
52.6861	64.5753		51.7338	64.0903	64.2399	53.287	50.065	70.1372	65.1456		159.057		138.589
52.6861	55.1193		51.7338	64.0903	64.2399	53.287	50.065	70.1372	65.1456		159.057		138.589
52.6861	55.1193		51.7338	64.0903	64.2399	53.287	50.065	70.1372	65.1456		159.057		138.589
52.6861	55.1193		51.7338	64.0903	64.2399	53.287	50.065	70.1372	65.1456		159.057		138.589
52.6861	55.1193		51.7338	64.0903	64.2399	53.287	50.065	70.1372	65.1456		159.057		138.589
52.6861	55.1193		51.7338	64.0903	64.2399	53.287	50.065	70.1372	65.1456		159.057		138.589
52.6861	55.1193		51.7338	64.0903	64.2399	53.287	50.065	70.1372	65.1456		159.057		138.589
52.6861	55.1193		51.7338	64.0903	64.2399	53.287	50.065	70.1372	65.1456		159.057		138.589
52.6861	55.1193		51.7338	64.0903	64.2399	53.287	50.065	70.1372	65.1456		159.057		138.589
52.6861	55.1193		51.7338	64.0903	64.2399	53.287	50.065	70.1372	65.1456		159.057		136.637
52.6861	55.1193		51.7338	54.6489	64.2399	53.287	50.065	70.1372	65.1456		159.057		136.637
52.6861	55.1193		51.7338	54.6489	64.2399	53.287	50.065	70.1372	65.1456		158.907		136.637
52.6861	55.1193		51.7338	54.6489	64.2399	53.287	50.065	70.1372	65.1456		158.907		136.637
52.6861	55.1193		51.7338	54.6489	64.2399	53.287	50.065	70.1372	65.1456		158.907		136.637
52.6861	55.1193		51.7338	54.6489	64.2399	53.287	50.065	70.1372	65.1456		158.907		136.637
52.6861	55.1193		51.7338	54.6489	64.2399	53.287	50.065	70.1372	65.1456		158.907		136.637
52.6861	55.1193		51.7338	54.6489	64.2399	53.287	50.065	70.1372	65.1456		158.907		136.637
52.6861	55.1193		51.7338	54.6489	64.2399	53.287	50.065	60.6666	65.1456		157.106		136.637
52.6861	55.1193		51.7338	54.6489	64.2399	53.287	50.065	60.6666	65.1456		157.106		136.637
52.6861	55.1193		51.7338	54.6489	64.2399	53.287	50.065	60.6666	65.1456		157.106		136.637
52.6861	55.1193		51.7338	54.6489	64.2399	53.287	50.065	60.6666	65.1456		157.106		136.637
52.6861	55.1193		51.7338	54.6489	64.2399	53.287	50.065	60.6666	65.1456		157.106		136.637
52.6861	55.1193		51.7338	54.6489	64.2399	53.287	50.065	60.6666	65.1456		157.106		136.637
52.6861	55.1193		51.7338	54.6489	64.2399	53.287	50.065	60.6666	65.1456		157.106		136.637
52.6861	55.1193		51.7338	54.6489	64.2399	53.287	50.065	60.6666	65.1456		157.106		136.637
52.6861	55.1193		51.7338	54.6489	64.2399	53.287	50.065	60.6666	65.1456		157.106		136.637
52.6861	55.1193		51.7338	54.6489	64.2399	53.287	50.065	60.6666	65.1456		157.106		136.637
52.6861	55.1193		51.7338	54.6489	64.2399	53.287	50.065	60.6666	65.1456		156.072		136.637
52.6861	55.1193		51.7338	54.6489	64.2399	53.287	50.065	60.6666	65.1456		156.072		136.637
52.6861	55.1193		51.7338	54.6489	64.2399	53.287	50.065	60.6666	65.1456		156.072		136.637
52.6861	55.1193		51.7338	54.6489	64.2399	53.287	50.065	60.6666	65.1456		156.072		136.637
52.6861	55.1193		51.7338	54.6489	64.2399	53.287	50.065	60.6666	65.1456		156.072		135.301
52.6861	55.1193		51.7338	54.6489	64.2399	53.287	50.065	60.6666	65.1456		156.072		135.301
52.6861	55.1193		51.7338	54.6489	64.2399	53.287	50.065	60.6666	65.1456		156.072		135.301
52.6861	55.1193		51.7338	54.6489	64.2399	53.287	50.065	60.6666	65.1456		156.072		135.301
52.6861	55.1193		51.7338	54.6489	64.2399	53.287	50.065	60.6666	65.1456		156.072		135.301
52.6861	55.1193		51.7338	54.6489	64.2399	53.287	50.065	60.6666	65.1456		150.009		135.301
52.6861	55.1193		51.7338	54.6489	64.2399	53.287	50.065	60.6666	65.1456		150.009		135.301
52.6861	55.1193		51.7338	54.6489	54.7985	53.287	50.065	60.6666	65.1456		150.009		135.301
52.6861	55.1193		51.7338	54.6489	54.7985	53.287	50.065	60.6666	65.1456		150.009		135.301
52.6861	55.1193		51.7338	54.6489	54.7985	53.287	50.065	60.6666	65.1456		150.009		135.301
52.6861	55.1193		51.7338	54.6489	54.7985	53.287	50.065	60.6666	65.1456		150.009		135.301
52.6861	55.1193		51.7338	54.6489	54.7985	53.287	50.065	60.6666	65.1456		150.009		131.646
52.6861	55.1193		51.7338	54.6489	54.7985	53.287	50.065	60.6666	65.1456		150.009		131.646
52.6861	55.1193		51.7338	54.6489	54.7985	53.287	50.065	60.6666	65.1456		150.009		131.646
52.6861	55.1193		51.7338	54.6489	54.7985	53.287	50.065	60.6666	65.1456		150.009		131.646
52.6861	55.1193		51.7338	54.6489	54.7985	53.287	50.065	60.6666	65.1456		150.009		131.646
52.6861	55.1193			54.6489	54.7985	53.287	50.065	60.6666	65.1456		150.009		131.646
52.6861	55.1193			54.6489	54.7985	53.287	50.065	60.6666	65.1456		150.009		131.646
52.6861	55.1193			54.6489	54.7985	53.287	50.065	60.6666	65.1456		150.009		131.646
52.6861	55.1193			54.6489	54.7985	53.287	50.065	60.6666	65.1456		150.009		131.646
52.6861	55.1193			54.6489	54.7985	53.287	50.065	60.6666	65.1456		150.009		131.646
52.6861	55.1193			54.6489	54.7985	53.287	50.065	60.6666	65.1456		150.009		131.646
52.6861	55.1193			54.6489	54.7985	53.287	50.065	60.6666	65.1456		150.009		131.646
52.6861	55.1193			54.6489	54.7985	53.287	50.065	60.6666	65.1456		150.009		131.646
52.6861	55.1193			54.6489	54.7985	53.287	50.065	60.6666	65.1456		150.009		131.646
52.6861	55.1193			54.6489	54.7985	53.287	50.065	60.6666	65.1456		149.968		131.646
52.6861	55.1193			54.6489	54.7985	53.287	50.065	60.6666	65.1456		149.968		131.646
52.6861	55.1193			54.6489	54.7985	53.287	50.065	60.6666	65.1456		149.968		131.646
52.6861	55.1193			54.6489	54.7985	53.287	50.065	60.6666	65.1456		149.968		131.646
52.6861	55.1193			54.6489	54.7985	53.287	50.065	60.6666	65.1456		149.968		131.646
52.6861	55.1193			54.6489	54.7985	53.287	50.065	60.6666	65.1456		149.968		131.646
52.6861	55.1193			54.6489	54.7985	53.287	50.065	60.6666	65.1456		149.968		131.646
52.6861	55.1193			54.6489	54.7985	53.287	50.065	60.6666	65.1456		149.968		131.646
52.6861	55.1193			54.6489	54.7985	53.287	50.065	60.6666	65.1456		149.542		131.646
52.6861	55.1193			54.6489	54.7985	53.287	50.065	60.6666	65.1456		149.542		131.646
52.6861	55.1193			54.6489	54.7985	53.287	50.065	60.6666	65.1456		149.542		131.646
52.6861	55.1193			54.6489	54.7985	53.287	50.065	60.6666	65.1456		149.542		131.646
52.6861	55.1193			54.6489	54.7985	53.287	50.065	60.6666	65.1456		149.542		131.646
52.6861	55.1193			54.6489	54.7985	53.287	50.065	60.6666	65.1456		149.542		131.646
52.6861	55.1193			54.6489	54.7985	53.287	50.065	60.6666	65.1456		149.542		131.646
52.6861	55.1193			54.6489	54.7985	53.287	50.065	60.6666	65.1456		149.542		131.646
52.6861	55.1193			54.6489	54.7985	53.287	50.065	60.6666	65.1456		149.542		129.082
52.6861	55.1193			54.6489	54.7985	53.287	50.065	60.6666	65.1456		149.542		129.082
52.6861	55.1193			54.6489	54.7985	53.287	50.065	60.6666	65.1456		149.542		129.082
52.6861	55.1193			54.6489	54.7985	53.287	50.065	60.6666	65.1456		149.542		129.082
52.6861	55.1193			54.6489	54.7985	53.287	50.065	60.6666	65.1456		149.542		129.082
52.6861	55.1193			54.6489	54.7985	53.287	50.065	60.6666	65.1456		149.542		129.082
52.6861	55.1193			54.6489	54.7985	53.287	50.065	60.6666	65.1456		149.542		129.082
52.6861	55.1193			54.6489	54.7985	53.287	50.065	60.6666	65.1456		149.392		129.082
52.6861	55.1193			54.6489	54.7985	53.287	50.065	60.6666	65.1456		149.392		129.082
52.6861	55.1193			54.6489	54.7985	53.287	50.065	60.6666	65.1456		149.392		129.082
52.6861	55.1193			54.6489	54.7985	53.287		60.6666	65.1456		149.392		129.082
52.6861	55.1193			54.6489	54.7985	53.287		60.6666	65.1456		149.392		129.082
52.6861	55.1193			54.6489	54.7985	53.287		60.6666	65.1456		149.392		129.082
52.6861	55.1193			54.6489	54.7985	53.287		60.6666	65.1456		149.392		129.082
52.6861	55.1193			54.6489	54.7985	53.287		60.6666	65.1456		149.392		129.082
52.6861	55.1193			54.6489	54.7985	53.287		60.6666	65.1456		149.392		129.082
52.6861	55.1193			54.6489	54.7985	53.287		60.6666	65.1456		149.392		129.082
52.6861	55.1193			54.6489	54.7985	53.287		60.6666	65.1456		147.576		129.082
52.6861	55.1193			54.6489	54.7985	53.287		60.6666	65.1456		147.576		127.115
52.6861	55.1193			54.6489	54.7985	53.287		60.6666	65.1456		147.576		127.115
52.6861	55.1193			54.6489	54.7985	53.287		60.6666	65.1456		147.576		127.115
52.6861	55.1193			54.6489	54.7985	53.287		60.6666	65.1456		147.576		127.115
52.6861	55.1193			54.6489	54.7985	53.287		60.6666	65.1456		147.576		127.115
52.6861	55.1193			54.6489	54.7985	53.287		60.6666	65.1456		147.576		127.115
52.6861	55.1193			54.6489	54.7985	53.287		60.6666	65.1456		147.576		127.115
52.6861	55.1193			54.6489	54.7985	53.287		60.6666	65.1456		147.576		127.115
52.6861	55.1193			54.6489	54.7985	53.287		60.6666	65.1456		147.576		127.115
52.6861	55.1193			54.6489	54.7985	53.287		60.6666	65.1456		147.576		127.115
52.6861	55.1193			54.6489	54.7985	53.287		60.6666	65.1456		147.576		127.115
52.6861	55.1193			54.6489	54.7985	53.287		60.6666	65.1456		147.576		127.115
52.6861	55.1193			54.6489	54.7985	53.287		60.6666	65.1456		146.55		127.115
52.6861	55.1193			54.6489	54.7985	53.287		60.6666	65.1456		146.55		127.115
52.6861	55.1193			54.6489	54.7985	53.287		60.6666	65.1456		146.55		127.115
52.6861	55.1193			54.6489	54.7985	53.287		60.6666	65.1456		146.55		127.115
52.6861	55.1193			54.6489	54.7985	53.287		60.6666	65.1456		146.55		127.115
52.6861	55.1193			54.6489	54.7985	53.287		60.6666	65.1456		146.55		127.115
52.6861	55.1193			54.6489	54.7985	53.287		60.6666	65.1456		146.55		127.115
52.6861	55.1193			54.6489	54.7985	53.287		60.6666	65.1456		146.55		127.115
52.6861	55.1193			54.6489	54.7985	53.287		60.6666	65.1456		146.55		127.115
52.6861	55.1193			54.6489	54.7985	53.287		60.6666	65.1456		146.55		127.115
52.6861	55.1193			54.6489	54.7985	53.287		60.6666	65.1456		146.55		127.115
52.6861	55.1193			54.6489	54.7985	53.287		60.6666	65.1456		140.487		127.115
52.6861	55.1193			54.6489	54.7985	53.287		60.6666	65.1456		140.487		127.115
52.6861	55.1193			54.6489	54.7985	53.287		60.6666	65.1456		140.487		127.115
52.6861	55.1193			54.6489	54.7985	53.287		60.6666	65.1456		140.487		127.115
52.6861	55.1193			54.6489	54.7985	53.287		60.6666	65.1456		140.487		127.115
52.6861	55.1193			54.6489	54.7985	53.287		60.6666			140.487		127.115
52.6861	55.1193			54.6489	54.7985	53.287		60.6666			140.487		125.801
52.6861	55.1193			54.6489	54.7985	53.287		60.6666			140.487		125.801
52.6861	55.1193			54.6489	54.7985	53.287		60.6666			140.487		125.801
52.6861	55.1193			54.6489	54.7985	53.287		60.6666			140.487		125.801
52.6861	55.1193			54.6489	54.7985	53.287		60.6666			140.487		125.801
52.6861	55.1193			54.6489	54.7985	53.287		60.6666			140.446		125.801
52.6861	55.1193			54.6489	54.7985	53.287		60.6666			140.446		125.801
52.6861	55.1193			54.6489	54.7985	53.287		60.6666			140.446		125.801
52.6861	55.1193			54.6489	54.7985	53.287		60.6666			140.446		125.801
52.6861	55.1193			54.6489	54.7985	53.287		60.6666			140.446		125.801
52.6861	55.1193			54.6489	54.7985	53.287		60.6666			140.446		125.801
52.6861	55.1193			54.6489	54.7985	53.287		60.6666			140.446		125.801
52.6861	55.1193			54.6489	54.7985	53.287		60.6666			140.446		122.124
52.6861	55.1193			54.6489	54.7985	53.287		60.6666			140.446		122.124
52.6861	55.1193			54.6489	54.7985	53.287		60.6666			140.035		122.124
52.6861	55.1193			54.6489	54.7985	53.287		60.6666			140.035		122.124
52.6861	55.1193			54.6489	54.7985	53.287		60.6666			140.035		122.124
52.6861	55.1193			54.6489	54.7985	53.287		60.6666			140.035		122.124
52.6861	55.1193			54.6489	54.7985	53.287		60.6666			140.035		122.124
52.6861	55.1193			54.6489	54.7985	53.287		60.6666			140.035		122.124
52.6861	55.1193			54.6489	54.7985	53.287		60.6666			140.035		122.124
52.6861	55.1193			54.6489	54.7985	53.287		60.6666			140.035		122.124
52.6861	55.1193			54.6489	54.7985	53.287		60.6666			140.035		122.124
52.6861	55.1193			54.6489	54.7985	53.287		60.6666			140.035		122.124
52.6861	55.1193			54.6489	54.7985	53.287		60.6666			140.035		122.124
52.6861	55.1193			54.6489	54.7985	53.287		60.6666			140.035		122.124
52.6861	55.1193			54.6489	54.7985	53.287		60.6666			140.035		122.124
52.6861	55.1193			54.6489	54.7985	53.287		60.6666			140.035		122.124
52.6861	55.1193			54.6489	54.7985	53.287		60.6666			140.035		122.124
52.6861	55.1193			54.6489	54.7985	53.287		60.6666			140.035		122.124
52.6861	55.1193			54.6489	54.7985	53.287		60.6666			140.035		122.124
52.6861	55.1193			54.6489	54.7985	53.287		60.6666			140.035		122.124
52.6861	55.1193			54.6489	54.7985	53.287		60.6666			140.035		122.124
52.6861	55.1193			54.6489	54.7985	53.287		60.6666			139.885		122.124
52.6861	55.1193			54.6489	54.7985	53.287		60.6666			139.885		119.582
52.6861	55.1193			54.6489	54.7985	53.287		60.6666			139.885		119.582
52.6861	55.1193			54.6489	54.7985	53.287		60.6666			139.885		119.582
52.6861	55.1193			54.6489	54.7985	53.287		60.6666			139.885		119.582
52.6861	55.1193			54.6489	54.7985	53.287		60.6666			139.885		119.582
52.6861	55.1193			54.6489	54.7985	53.287		60.6666			139.885		119.582
52.6861	55.1193			54.6489	54.7985	53.287		60.6666			139.885		119.582
52.6861	55.1193			54.6489	54.7985	53.287		60.6666			139.885		119.582
52.6861	55.1193			54.6489	54.7985	53.287		60.6666			139.885		119.582
52.6861	55.1193			54.6489	54.7985	53.287		60.6666			139.885		119.582
52.6861	55.1193			54.6489	54.7985	53.287		60.6666			139.885		119.582
52.6861	55.1193			54.6489	54.7985	53.287		60.6666			139.885		119.582
52.6861	55.1193			54.6489	54.7985	53.287		60.6666			139.885		119.582
52.6861	55.1193			54.6489	54.7985	53.287		60.6666			139.885		119.582
52.6861	55.1193			54.6489	54.7985	53.287		60.6666			139.885		119.582
52.6861	55.1193			54.6489	54.7985	53.287		60.6666			139.885		119.582
52.6861	55.1193			54.6489	54.7985	53.287		60.6666			139.885		119.582
52.6861	55.1193			54.6489	54.7985	53.287		60.6666			139.885		119.582
52.6861	55.1193			54.6489	54.7985	53.287		60.6666			139.885		119.582
52.6861	55.1193			54.6489	54.7985	53.287		60.6666			139.885		119.582
52.6861	55.1193			54.6489	54.7985	53.287		60.6666			138.054		119.582
52.6861	55.1193			54.6489	54.7985	53.287		60.6666			138.054		119.582
52.6861	55.1193			54.6489	54.7985	53.287		60.6666			138.054		119.582
52.6861	55.1193			54.6489	54.7985	53.287		60.6666			138.054		119.582
52.6861	55.1193			54.6489	54.7985	53.287		60.6666			138.054		119.582
52.6861	55.1193			54.6489	54.7985	53.287		60.6666			138.054		119.582
52.6861	55.1193			54.6489	54.7985	53.287		60.6666			138.054		119.582
52.6861	55.1193			54.6489	54.7985	53.287		60.6666			138.054		117.6
52.6861	55.1193			54.6489	54.7985	53.287		60.6666			138.054		117.6
52.6861	55.1193			54.6489	54.7985	53.287		60.6666			138.054		117.6
52.6861	55.1193			54.6489	54.7985			60.6666			138.054		117.6
52.6861	55.1193			54.6489	54.7985			60.6666			138.054		117.6
52.6861	55.1193			54.6489	54.7985			60.6666			138.054		117.6
52.6861	55.1193			54.6489	54.7985			60.6666			138.054		117.6
52.6861	55.1193			54.6489	54.7985			60.6666			137.036		117.6
52.6861	55.1193			54.6489	54.7985			60.6666			137.036		117.6
52.6861	55.1193			54.6489	54.7985			60.6666			137.036		117.6
52.6861	55.1193			54.6489	54.7985			60.6666			137.036		117.6
52.6861	55.1193			54.6489	54.7985			60.6666			137.036		117.6
52.6861	55.1193			54.6489	54.7985			60.6666			137.036		117.6
52.6861	55.1193			54.6489	54.7985			60.6666			137.036		117.6
52.6861	55.1193			54.6489	54.7985			60.6666			137.036		117.6
52.6861	53.2515			54.6489	54.7985						137.036		117.6
52.6861				54.6489	54.7985						130.972		117.6
52.6861				54.6489	54.7985						130.972		117.6
52.6861				54.6489	54.7985						130.972		117.6
52.6861				54.6489	54.7985						130.972		117.6
52.6861				54.6489	54.7985						130.972		117.6
52.6861				54.6489	54.7985						130.972		117.6
52.6861				54.6489	54.7985						130.972		117.6
52.6861				54.6489	54.7985						130.972		117.6
52.6861				54.6489	54.7985						130.972		117.6
52.6861				54.6489	54.7985						130.972		117.6
52.6861				54.6489	54.7985						130.972		117.6
52.6861				54.6489	54.7985						130.972		116.308
52.6861				54.6489	54.7985						130.972		116.308
52.6861				54.6489	54.7985						130.972		116.308
52.6861				54.6489	54.7985						130.972		116.308
52.6861				54.6489	54.7985						130.972		116.308
52.6861				54.6489	54.7985						130.972		116.308
52.6861				54.6489	54.7985						130.972		116.308
52.6861				54.6489	54.7985						130.972		116.308
52.6861				54.6489	54.7985						130.972		116.308
52.6861				54.6489	54.7985						130.972		116.308
52.6861				54.6489	54.7985						130.972		116.308
52.6861				54.6489	54.7985						130.972		116.308
52.6861				54.6489	54.7985						130.972		116.308
52.6861				54.6489	54.7985						130.972		116.308
52.6861				54.6489	54.7985						130.931		116.308
52.6861				54.6489	54.7985						130.931		116.308
52.6861				54.6489	54.7985						130.931		112.609
52.6861				54.6489	54.7985						130.931		112.609
52.6861				54.6489	54.7985						130.931		112.609
52.6861				54.6489	54.7985						130.931		112.609
52.6861				54.6489	54.7985						130.931		112.609
52.6861				54.6489	54.7985						130.931		112.609
				54.6489	54.7985						130.931		112.609
				54.6489	54.7985						130.931		112.609
				54.6489	54.7985						130.931		112.609
				54.6489	54.7985						130.535		112.609
				54.6489	54.7985						130.535		112.609
				54.6489	54.7985						130.535		112.609
				54.6489	54.7985						130.535		112.609
				54.6489	54.7985						130.535		112.609
				54.6489	54.7985						130.535		112.609
				54.6489	54.7985						130.535		112.609
				54.6489	54.7985						130.535		112.609
				54.6489	54.7985						130.535		112.609
				45.2147	54.7985						130.535		112.609
				45.2147	54.7985						130.535		112.609
				45.2147	54.7985						130.535		112.609
				45.2147	54.7985						130.535		112.609
				45.2147	54.7985						130.535		112.609
				45.2147	54.7985						130.535		112.609
				45.2147	54.7985						130.535		112.609
				45.2147	54.7985						130.535		112.609
				45.2147	54.7985						130.535		112.609
				45.2147	54.7985						130.535		112.609
				45.2147	54.7985						130.385		112.609
				45.2147	54.7985						130.385		112.609
				45.2147	54.7985						130.385		112.609
				45.2147	54.7985						130.385		112.609
				45.2147	54.7985						130.385		112.609
				45.2147	54.7985						130.385		112.609
				45.2147	54.7985						130.385		112.609
				45.2147	54.7985						130.385		112.609
				45.2147	54.7985						130.385		112.609
				45.2147	54.7985						130.385		112.609
				45.2147	54.7985						130.385		112.609
				45.2147	54.7985						130.385		112.609
				45.2147	54.7985						130.385		112.609
				45.2147	54.7985						130.385		112.609
				45.2147	54.7985						130.385		112.609
				45.2147	54.7985						130.385		112.609
				45.2147	54.7985						130.385		112.609
				45.2147	54.7985						130.385		112.609
				45.2147	54.7985						130.385		112.609
				45.2147	54.7985						130.385		112.609
				45.2147	54.7985						130.385		112.609
				45.2147	54.7985						130.385		112.609
				45.2147	54.7985						128.539		110.089
				45.2147	54.7985						128.539		110.089
				45.2147	54.7985						128.539		110.089
				45.2147	54.7985						128.539		110.089
				45.2147	54.7985						128.539		110.089
				45.2147	54.7985						128.539		110.089
				45.2147	54.7985						128.539		110.089
				45.2147	54.7985						128.539		110.089
				45.2147	54.7985						128.539		110.089
				45.2147	54.7985						128.539		110.089
				45.2147	54.7985						128.539		110.089
				45.2147	54.7985						128.539		110.089
				45.2147	45.3643						128.539		110.089
				45.2147	45.3643						128.539		110.089
				45.2147	45.3643						128.539		110.089
				45.2147	45.3643						128.539		110.089
				45.2147	45.3643						128.539		110.089
				45.2147	45.3643						128.539		110.089
				45.2147	45.3643						128.539		110.089
				45.2147	45.3643						127.528		110.089
				45.2147	45.3643						127.528		110.089
				45.2147	45.3643						127.528		110.089
				45.2147	45.3643						127.528		110.089
				45.2147	45.3643						127.528		110.089
				45.2147	45.3643						127.528		110.089
				45.2147	45.3643						127.528		110.089
				45.2147	45.3643						127.528		110.089
				45.2147	45.3643						127.528		110.089
				45.2147	45.3643						127.528		110.089
				45.2147	45.3643						127.528		110.089
				45.2147	45.3643						127.528		108.093
				45.2147	45.3643						127.528		108.093
				45.2147	45.3643						127.528		108.093
				45.2147	45.3643						121.465		108.093
				45.2147	45.3643						121.465		108.093
				45.2147	45.3643						121.465		108.093
				45.2147	45.3643						121.465		108.093
				45.2147	45.3643						121.465		108.093
				45.2147	45.3643						121.465		108.093
				45.2147	45.3643						121.465		108.093
				45.2147	45.3643						121.465		108.093
				45.2147	45.3643						121.465		108.093
				45.2147	45.3643						121.465		108.093
				45.2147	45.3643						121.465		108.093
				45.2147	45.3643						121.465		108.093
				45.2147	45.3643						121.465		108.093
				45.2147	45.3643						121.465		108.093
				45.2147	45.3643						121.465		108.093
				45.2147	45.3643						121.465		108.093
				45.2147	45.3643						121.465		108.093
				45.2147	45.3643						121.465		108.093
				45.2147	45.3643						121.465		108.093
				45.2147	45.3643						121.424		108.093
				45.2147	45.3643						121.424		108.093
				45.2147	45.3643						121.424		108.093
				45.2147	45.3643						121.424		108.093
				45.2147	45.3643						121.424		108.093
				45.2147	45.3643						121.424		108.093
				45.2147	45.3643						121.424		108.093
				45.2147	45.3643						121.424		108.093
				45.2147	45.3643						121.424		108.093
				45.2147	45.3643						121.424		108.093
				45.2147	45.3643						121.424		108.093
				45.2147	45.3643						121.424		108.093
				45.2147	45.3643						121.424		108.093
				45.2147	45.3643						121.424		108.093
				45.2147	45.3643						121.042		108.093
				45.2147	45.3643						121.042		108.093
				45.2147	45.3643						121.042		108.093
				45.2147	45.3643						121.042		108.093
				45.2147	45.3643						121.042		108.093
				45.2147	45.3643						121.042		108.093
				45.2147	45.3643						121.042		108.093
				45.2147	45.3643						121.042		108.093
				45.2147	45.3643						121.042		106.823
				45.2147	45.3643						121.042		106.823
				45.2147	45.3643						121.042		106.823
				45.2147	45.3643						121.042		106.823
				45.2147	45.3643						121.042		106.823
				45.2147	45.3643						121.042		106.823
				45.2147	45.3643						121.042		106.823
				45.2147	45.3643						121.042		106.823
				45.2147	45.3643						121.042		106.823
				45.2147	45.3643						121.042		106.823
				45.2147	45.3643						121.042		106.823
				45.2147	45.3643						121.042		106.823
				45.2147	45.3643						121.042		106.823
				45.2147	45.3643						121.042		106.823
				45.2147	45.3643						121.042		103.101
				45.2147	45.3643						121.042		103.101
				45.2147	45.3643						121.042		103.101
				45.2147	45.3643						121.042		103.101
				45.2147	45.3643						121.042		103.101
				45.2147	45.3643						121.042		103.101
				45.2147	45.3643						121.042		103.101
				45.2147	45.3643						121.042		103.101
				45.2147	45.3643						121.042		103.101
				45.2147	45.3643						121.042		103.101
				45.2147	45.3643						121.042		103.101
				45.2147	45.3643						120.892		103.101
				45.2147	45.3643						120.892		103.101
				45.2147	45.3643						120.892		103.101
				45.2147	45.3643						120.892		103.101
				45.2147	45.3643						120.892		103.101
				45.2147	45.3643						120.892		103.101
				45.2147	45.3643						120.892		103.101
				45.2147	45.3643						120.892		103.101
				45.2147	45.3643						120.892		103.101
				45.2147	45.3643						120.892		103.101
				45.2147	45.3643						120.892		103.101
				45.2147	45.3643						120.892		103.101
				45.2147	45.3643						120.892		103.101
				45.2147	45.3643						120.892		103.101
				45.2147	45.3643						120.892		103.101
				45.2147	45.3643						120.892		103.101
				45.2147	45.3643						120.892		103.101
				45.2147	45.3643						120.892		103.101
				45.2147	45.3643						120.892		103.101
				45.2147	45.3643						120.892		103.101
				45.2147	45.3643						120.892		103.101
				45.2147	45.3643						120.892		103.101
				45.2147	45.3643						120.892		103.101
				45.2147	45.3643						120.892		103.101
				45.2147	45.3643						120.892		103.101
				45.2147	45.3643						120.892		103.101
				45.2147	45.3643						120.892		103.101
				45.2147	45.3643						120.892		103.101
				45.2147	45.3643						120.892		103.101
				45.2147	45.3643						120.892		103.101
				45.2147	45.3643						119.032		103.101
				45.2147	45.3643						119.032		103.101
				45.2147	45.3643						119.032		103.101
				45.2147	45.3643						119.032		103.101
				45.2147	45.3643						119.032		103.101
				45.2147	45.3643						119.032		103.101
				45.2147	45.3643						119.032		103.101
				45.2147	45.3643						119.032		103.101
				45.2147	45.3643						119.032		100.604
				45.2147	45.3643						119.032		100.604
				45.2147	45.3643						119.032		100.604
				45.2147	45.3643						119.032		100.604
				45.2147	45.3643						119.032		100.604
				45.2147	45.3643						119.032		100.604
				45.2147	45.3643						119.032		100.604
				45.2147	45.3643						119.032		100.604
				45.2147	45.3643						119.032		100.604
				45.2147	45.3643						119.032		100.604
				45.2147	45.3643						119.032		100.604
				45.2147	45.3643						119.032		100.604
				45.2147	45.3643						119.032		100.604
				45.2147	45.3643						119.032		100.604
				45.2147	45.3643						119.032		100.604
				45.2147	45.3643						118.028		100.604
				45.2147	45.3643						118.028		100.604
				45.2147	45.3643						118.028		100.604
				45.2147	45.3643						118.028		100.604
				45.2147	45.3643						118.028		100.604
				45.2147	45.3643						118.028		100.604
				45.2147	45.3643						118.028		100.604
				45.2147	45.3643						118.028		100.604
				45.2147	45.3643						118.028		100.604
				45.2147	45.3643						118.028		100.604
				45.2147	45.3643						118.028		100.604
				45.2147	45.3643						118.028		100.604
				45.2147	45.3643						118.028		100.604
				45.2147	45.3643						118.028		100.604
				45.2147	45.3643						118.028		100.604
				45.2147	45.3643						118.028		100.604
				45.2147	45.3643						118.028		100.604
				45.2147	45.3643						118.028		98.5931
				45.2147	45.3643						118.028		98.5931
				45.2147	45.3643						118.028		98.5931
				45.2147	45.3643						118.028		98.5931
				45.2147	45.3643						118.028		98.5931
				45.2147	45.3643						118.028		98.5931
				45.2147	45.3643						118.028		98.5931
				45.2147	45.3643						118.028		98.5931
				45.2147	45.3643						111.965		98.5931
				45.2147	45.3643						111.965		98.5931
				45.2147	45.3643						111.965		98.5931
				45.2147	45.3643						111.965		98.5931
				45.2147	45.3643						111.965		98.5931
				45.2147	45.3643						111.965		98.5931
				45.2147	45.3643						111.965		98.5931
				45.2147	45.3643						111.965		98.5931
				45.2147	45.3643						111.965		98.5931
				45.2147	45.3643						111.965		98.5931
				45.2147	45.3643						111.965		98.5931
				45.2147	45.3643						111.965		98.5931
				45.2147	45.3643						111.965		98.5931
				45.2147	45.3643						111.965		98.5931
				45.2147	45.3643						111.965		98.5931
				45.2147	45.3643						111.965		98.5931
				45.2147	45.3643						111.965		98.5931
				45.2147	45.3643						111.965		98.5931
				45.2147	45.3643						111.965		98.5931
				45.2147	45.3643						111.965		98.5931
				45.2147	45.3643						111.965		98.5931
				45.2147	45.3643						111.965		98.5931
				45.2147	45.3643						111.965		98.5931
				45.2147	45.3643						111.965		98.5931
				45.2147	45.3643						111.965		98.5931
				45.2147	45.3643						111.965		98.5931
				45.2147	45.3643						111.965		98.5931
				45.2147	45.3643						111.965		98.5931
				45.2147	45.3643						111.965		98.5931
				45.2147	45.3643						111.924		98.5931
				45.2147	45.3643						111.924		98.5931
				45.2147	45.3643						111.924		98.5931
				45.2147	45.3643						111.924		98.5931
				45.2147	45.3643						111.924		97.3452
				45.2147	45.3643						111.924		97.3452
				45.2147	45.3643						111.924		97.3452
				45.2147	45.3643						111.924		97.3452
				45.2147	45.3643						111.924		97.3452
				45.2147	45.3643						111.924		97.3452
				45.2147	45.3643						111.924		97.3452
				45.2147	45.3643						111.924		97.3452
				45.2147	45.3643						111.924		97.3452
				45.2147	45.3643						111.924		97.3452
				45.2147	45.3643						111.924		97.3452
				45.2147	45.3643						111.924		97.3452
				45.2147	45.3643						111.924		97.3452
				45.2147	45.3643						111.924		97.3452
				45.2147	45.3643						111.924		97.3452
				45.2147	45.3643						111.924		97.3452
				45.2147	45.3643						111.924		97.3452
				45.2147	45.3643						111.557		97.3452
				45.2147	45.3643						111.557		97.3452
				45.2147	45.3643						111.557		97.3452
				45.2147	45.3643						111.557		97.3452
				45.2147	45.3643						111.557		97.3452
				45.2147	45.3643						111.557		97.3452
				45.2147	45.3643						111.557		97.3452
				45.2147	45.3643						111.557		97.3452
				45.2147	45.3643						111.557		97.3452
				45.2147	45.3643						111.557		97.3452
				45.2147	45.3643						111.557		97.3452
				45.2147	45.3643						111.557		97.3452
				45.2147	45.3643						111.557		97.3452
				45.2147	45.3643						111.557		97.3452
				45.2147	45.3643						111.557		97.3452
				45.2147	45.3643						111.557		97.3452
				45.2147	45.3643						111.557		97.3452
				45.2147	45.3643						111.557		97.3452
				45.2147	45.3643						111.557		97.3452
				45.2147	45.3643						111.557		93.6015
				45.2147	45.3643						111.557		93.6015
				45.2147	45.3643						111.557		93.6015
				45.2147	45.3643						111.557		93.6015
				45.2147	45.3643						111.557		93.6015
				45.2147	45.3643						111.557		93.6015
				45.2147	45.3643						111.557		93.6015
				45.2147	45.3643						111.557		93.6015
				45.2147	45.3643						111.557		93.6015
				45.2147	45.3643						111.557		93.6015
				45.2147	45.3643						111.557		93.6015
				45.2147	45.3643						111.557		93.6015
				45.2147	45.3643						111.557		93.6015
				45.2147	45.3643						111.557		93.6015
				45.2147	45.3643						111.557		93.6015
				45.2147	45.3643						111.557		93.6015
				45.2147	45.3643						111.557		93.6015
				45.2147	45.3643						111.557		93.6015
				45.2147	45.3643						111.557		93.6015
				45.2147	45.3643						111.557		93.6015
				45.2147	45.3643						111.557		93.6015
				45.2147	45.3643						111.557		93.6015
				45.2147	45.3643						111.407		93.6015
				45.2147	45.3643						111.407		93.6015
				45.2147	45.3643						111.407		93.6015
				45.2147	45.3643						111.407		93.6015
				45.2147	45.3643						111.407		93.6015
				45.2147	45.3643						111.407		93.6015
				45.2147	45.3643						111.407		93.6015
				45.2147	45.3643						111.407		93.6015
				45.2147	45.3643						111.407		93.6015
				45.2147	45.3643						111.407		93.6015
				45.2147	45.3643						111.407		93.6015
				45.2147	45.3643						111.407		93.6015
				45.2147	45.3643						111.407		93.6015
				45.2147	45.3643						111.407		93.6015
				45.2147	45.3643						111.407		93.6015
				45.2147	45.3643						111.407		93.6015
				45.2147	45.3643						111.407		93.6015
				45.2147	45.3643						111.407		93.6015
				45.2147	45.3643						111.407		93.6015
				45.2147	45.3643						111.407		93.6015
				45.2147	45.3643						111.407		93.6015
				45.2147	45.3643						111.407		93.6015
				45.2147	45.3643						111.407		93.6015
				45.2147	45.3643						111.407		93.6015
				45.2147	45.3643						111.407		93.6015
				45.2147	45.3643						111.407		93.6015
				45.2147	45.3643						111.407		93.6015
				45.2147	45.3643						109.532		93.6015
				45.2147	45.3643						109.532		93.6015
				45.2147	45.3643						109.532		93.6015
				45.2147	45.3643						109.532		93.6015
				45.2147	45.3643						109.532		93.6015
				45.2147	45.3643						109.532		93.6015
				45.2147	45.3643						109.532		93.6015
				45.2147	45.3643						109.532		93.6015
				45.2147	45.3643						109.532		93.6015
				45.2147	45.3643						109.532		93.6015
				45.2147	45.3643						109.532		93.6015
				45.2147	45.3643						109.532		91.1258
				45.2147	45.3643						109.532		91.1258
				45.2147	45.3643						109.532		91.1258
				45.2147	45.3643						109.532		91.1258
				45.2147	45.3643						109.532		91.1258
				45.2147	45.3643						109.532		91.1258
				45.2147	45.3643						109.532		91.1258
				45.2147	45.3643						109.532		91.1258
				45.2147	45.3643						109.532		91.1258
				45.2147	45.3643						109.532		91.1258
				45.2147	45.3643						109.532		91.1258
				45.2147	45.3643						109.532		91.1258
				45.2147	45.3643						109.532		91.1258
				45.2147	45.3643						109.532		91.1258
				45.2147	45.3643						109.532		91.1258
				45.2147	45.3643						109.532		91.1258
					45.3643						109.532		91.1258
					45.3643						109.532		91.1258
					45.3643						109.532		91.1258
					45.3643						109.532		91.1258
					45.3643						109.532		91.1258
					45.3643						109.532		91.1258
					45.3643						109.532		91.1258
					45.3643						108.536		91.1258
					45.3643						108.536		91.1258
					45.3643						108.536		91.1258
					45.3643						108.536		91.1258
					45.3643						108.536		91.1258
					45.3643						108.536		91.1258
					45.3643						108.536		91.1258
					45.3643						108.536		91.1258
					45.3643						108.536		91.1258
					45.3643						108.536		91.1258
					45.3643						108.536		91.1258
					45.3643						108.536		91.1258
					45.3643						108.536		91.1258
					45.3643						108.536		91.1258
					45.3643						108.536		91.1258
					45.3643						108.536		91.1258
					45.3643						108.536		91.1258
					45.3643						108.536		91.1258
					45.3643						108.536		91.1258
					45.3643						108.536		91.1258
					45.3643						108.536		89.1005
					45.3643						108.536		89.1005
					45.3643						108.536		89.1005
					45.3643						108.536		89.1005
					45.3643						108.536		89.1005
					45.3643						102.473		89.1005
					45.3643						102.473		89.1005
					45.3643						102.473		89.1005
					45.3643						102.473		89.1005
					45.3643						102.473		89.1005
					45.3643						102.473		89.1005
					45.3643						102.473		89.1005
					45.3643						102.473		89.1005
					45.3643						102.473		89.1005
					45.3643						102.473		89.1005
					45.3643						102.473		89.1005
					45.3643						102.473		89.1005
					45.3643						102.473		89.1005
					45.3643						102.473		89.1005
					45.3643						102.473		89.1005
					45.3643						102.473		89.1005
					45.3643						102.473		89.1005
					45.3643						102.473		89.1005
					45.3643						102.473		89.1005
					45.3643						102.473		89.1005
					45.3643						102.473		89.1005
					45.3643						102.473		89.1005
					45.3643						102.473		89.1005
					45.3643						102.473		89.1005
					45.3643						102.473		89.1005
					45.3643						102.473		89.1005
					45.3643						102.473		89.1005
					45.3643						102.473		89.1005
					45.3643						102.473		89.1005
					45.3643						102.473		89.1005
					45.3643						102.473		89.1005
					45.3643						102.473		89.1005
					45.3643						102.431		89.1005
					45.3643						102.431		89.1005
					45.3643						102.431		89.1005
					45.3643						102.431		89.1005
					45.3643						102.431		89.1005
					45.3643						102.431		89.1005
					45.3643						102.431		89.1005
					45.3643						102.431		89.1005
					45.3643						102.431		89.1005
					45.3643						102.431		89.1005
					45.3643						102.431		89.1005
					45.3643						102.431		89.1005
					45.3643						102.431		89.1005
					45.3643						102.431		89.1005
					45.3643						102.431		89.1005
					45.3643						102.431		89.1005
					45.3643						102.431		89.1005
					45.3643						102.431		89.1005
					45.3643						102.431		89.1005
					45.3643						102.431		89.1005
					45.3643						102.079		89.1005
					45.3643						102.079		89.1005
					45.3643						102.079		89.1005
					45.3643						102.079		89.1005
					45.3643						102.079		89.1005
					45.3643						102.079		89.1005
					45.3643						102.079		89.1005
					45.3643						102.079		89.1005
					45.3643						102.079		89.1005
					45.3643						102.079		89.1005
					45.3643						102.079		89.1005
					45.3643						102.079		89.1005
					45.3643						102.079		89.1005
					45.3643						102.079		87.8745
					45.3643						102.079		87.8745
					45.3643						102.079		87.8745
					45.3643						102.079		87.8745
					45.3643						102.079		87.8745
					45.3643						102.079		87.8745
					45.3643						102.079		87.8745
					45.3643						102.079		87.8745
											102.079		87.8745
											102.079		87.8745
											102.079		87.8745
											102.079		87.8745
											102.079		87.8745
											102.079		87.8745
											102.079		87.8745
											102.079		87.8745
											102.079		87.8745
											102.079		87.8745
											102.079		87.8745
											102.079		87.8745
											102.079		87.8745
											102.079		87.8745
											102.079		87.8745
											102.079		87.8745
											102.079		87.8745
											102.079		87.8745
											102.079		87.8745
											102.079		87.8745
											102.079		87.8745
											102.079		87.8745
											102.079		87.8745
											102.079		87.8745
											101.929		87.8745
											101.929		87.8745
											101.929		87.8745
											101.929		87.8745
											101.929		87.8745
											101.929		87.8745
											101.929		84.1089
											101.929		84.1089
											101.929		84.1089
											101.929		84.1089
											101.929		84.1089
											101.929		84.1089
											101.929		84.1089
											101.929		84.1089
											101.929		84.1089
											101.929		84.1089
											101.929		84.1089
											101.929		84.1089
											101.929		84.1089
											101.929		84.1089
											101.929		84.1089
											101.929		84.1089
											101.929		84.1089
											101.929		84.1089
											101.929		84.1089
											101.929		84.1089
											101.929		84.1089
											101.929		84.1089
											101.929		84.1089
											101.929		84.1089
											101.929		84.1089
											101.929		84.1089
											101.929		84.1089
											101.929		84.1089
											101.929		84.1089
											101.929		84.1089
											101.929		84.1089
											101.929		84.1089
											101.929		84.1089
											101.929		84.1089
											101.929		84.1089
											101.929		84.1089
											101.929		84.1089
											101.929		84.1089
											101.929		84.1089
											101.929		84.1089
											101.929		84.1089
											101.929		84.1089
											101.929		84.1089
											100.039		84.1089
											100.039		84.1089
											100.039		84.1089
											100.039		84.1089
											100.039		84.1089
											100.039		84.1089
											100.039		84.1089
											100.039		84.1089
											100.039		84.1089
											100.039		84.1089
											100.039		84.1089
											100.039		84.1089
											100.039		84.1089
											100.039		84.1089
											100.039		84.1089
											100.039		84.1089
											100.039		84.1089
											100.039		84.1089
											100.039		84.1089
											100.039		84.1089
											100.039		84.1089
											100.039		84.1089
											100.039		84.1089
											100.039		84.1089
											100.039		84.1089
											100.039		84.1089
											100.039		84.1089
											100.039		84.1089
											100.039		84.1089
											100.039		84.1089
											100.039		84.1089
											100.039		84.1089
											100.039		84.1089
											100.039		84.1089
											100.039		84.1089
											100.039		84.1089
											100.039		81.6551
											100.039		81.6551
											100.039		81.6551
											100.039		81.6551
											100.039		81.6551
											100.039		81.6551
											100.039		81.6551
											100.039		81.6551
											99.0505		81.6551
											99.0505		81.6551
											99.0505		81.6551
											99.0505		81.6551
											99.0505		81.6551
											99.0505		81.6551
											99.0505		81.6551
											99.0505		81.6551
											99.0505		81.6551
											99.0505		81.6551
											99.0505		81.6551
											99.0505		81.6551
											99.0505		81.6551
											99.0505		81.6551
											99.0505		81.6551
											99.0505		81.6551
											99.0505		81.6551
											99.0505		81.6551
											99.0505		81.6551
											99.0505		81.6551
											99.0505		81.6551
											99.0505		81.6551
											99.0505		81.6551
											99.0505		81.6551
											99.0505		81.6551
											99.0505		81.6551
											99.0505		81.6551
											99.0505		81.6551
											99.0505		81.6551
											99.0505		81.6551
											99.0505		81.6551
											99.0505		81.6551
											99.0505		81.6551
											99.0505		81.6551
											99.0505		81.6551
											92.9873		81.6551
											92.9873		81.6551
											92.9873		81.6551
											92.9873		81.6551
											92.9873		81.6551
											92.9873		81.6551
											92.9873		81.6551
											92.9873		81.6551
											92.9873		81.6551
											92.9873		81.6551
											92.9873		81.6551
											92.9873		81.6551
											92.9873		81.6551
											92.9873		81.6551
											92.9873		81.6551
											92.9873		81.6551
											92.9873		81.6551
											92.9873		79.6152
											92.9873		79.6152
											92.9873		79.6152
											92.9873		79.6152
											92.9873		79.6152
											92.9873		79.6152
											92.9873		79.6152
											92.9873		79.6152
											92.9873		79.6152
											92.9873		79.6152
											92.9873		79.6152
											92.9873		79.6152
											92.9873		79.6152
											92.9873		79.6152
											92.9873		79.6152
											92.9873		79.6152
											92.9873		79.6152
											92.9873		79.6152
											92.9873		79.6152
											92.9873		79.6152
											92.9873		79.6152
											92.9873		79.6152
											92.9873		79.6152
											92.9873		79.6152
											92.9873		79.6152
											92.9873		79.6152
											92.9873		79.6152
											92.9873		79.6152
											92.9873		79.6152
											92.9873		79.6152
											92.9873		79.6152
											92.9873		79.6152
											92.9873		79.6152
											92.9873		79.6152
											92.9873		79.6152
											92.9873		79.6152
											92.9873		79.6152
											92.9873		79.6152
											92.9873		79.6152
											92.9873		79.6152
											92.9461		79.6152
											92.9461		79.6152
											92.9461		79.6152
											92.9461		79.6152
											92.9461		79.6152
											92.9461		79.6152
											92.9461		79.6152
											92.9461		79.6152
											92.9461		79.6152
											92.9461		79.6152
											92.9461		79.6152
											92.9461		79.6152
											92.9461		79.6152
											92.9461		79.6152
											92.9461		79.6152
											92.9461		79.6152
											92.9461		79.6152
											92.9461		79.6152
											92.9461		79.6152
											92.9461		79.6152
											92.9461		79.6152
											92.9461		79.6152
											92.9461		79.6152
											92.9461		79.6152
											92.9461		79.6152
											92.9461		79.6152
											92.9461		79.6152
											92.9461		79.6152
											92.6081		79.6152
											92.6081		79.6152
											92.6081		79.6152
											92.6081		79.6152
											92.6081		79.6152
											92.6081		79.6152
											92.6081		79.6152
											92.6081		79.6152
											92.6081		79.6152
											92.6081		79.6152
											92.6081		79.6152
											92.6081		79.6152
											92.6081		79.6152
											92.6081		79.6152
											92.6081		78.4112
											92.6081		78.4112
											92.6081		78.4112
											92.6081		78.4112
											92.6081		78.4112
											92.6081		78.4112
											92.6081		78.4112
											92.6081		78.4112
											92.6081		78.4112
											92.6081		78.4112
											92.6081		78.4112
											92.6081		78.4112
											92.6081		78.4112
											92.6081		78.4112
											92.6081		78.4112
											92.6081		78.4112
											92.6081		78.4112
											92.6081		78.4112
											92.6081		78.4112
											92.6081		78.4112
											92.6081		78.4112
											92.6081		78.4112
											92.6081		78.4112
											92.6081		78.4112
											92.6081		78.4112
											92.6081		78.4112
											92.6081		78.4112
											92.6081		78.4112
											92.6081		78.4112
											92.6081		78.4112
											92.6081		78.4112
											92.6081		78.4112
											92.6081		78.4112
											92.6081		78.4112
											92.6081		78.4112
											92.6081		78.4112
											92.6081		78.4112
											92.6081		78.4112
											92.6081		78.4112
											92.6081		78.4112
											92.6081		78.4112
											92.6081		78.4112
											92.6081		78.4112
											92.6081		78.4112
											92.6081		78.4112
											92.6081		78.4112
											92.6081		78.4112
											92.6081		78.4112
											92.6081		78.4112
											92.4584		78.4112
											92.4584		78.4112
											92.4584		78.4112
											92.4584		78.4112
											92.4584		78.4112
											92.4584		78.4112
											92.4584		78.4112
											92.4584		78.4112
											92.4584		78.4112
											92.4584		78.4112
											92.4584		78.4112
											92.4584		78.4112
											92.4584		78.4112
											92.4584		78.4112
											92.4584		78.4112
											92.4584		78.4112
											92.4584		78.4112
											92.4584		78.4112
											92.4584		78.4112
											92.4584		74.6236
											92.4584		74.6236
											92.4584		74.6236
											92.4584		74.6236
											92.4584		74.6236
											92.4584		74.6236
											92.4584		74.6236
											92.4584		74.6236
											92.4584		74.6236
											92.4584		74.6236
											92.4584		74.6236
											92.4584		74.6236
											92.4584		74.6236
											92.4584		74.6236
											92.4584		74.6236
											92.4584		74.6236
											92.4584		74.6236
											92.4584		74.6236
											92.4584		74.6236
											92.4584		74.6236
											92.4584		74.6236
											92.4584		74.6236
											92.4584		74.6236
											92.4584		74.6236
											92.4584		74.6236
											92.4584		74.6236
											92.4584		74.6236
											92.4584		74.6236
											92.4584		74.6236
											92.4584		74.6236
											92.4584		74.6236
											92.4584		74.6236
											92.4584		74.6236
											92.4584		74.6236
											92.4584		74.6236
											92.4584		74.6236
											92.4584		74.6236
											92.4584		74.6236
											92.4584		74.6236
											92.0424		74.6236
											90.5541		74.6236
											90.5541		74.6236
											90.5541		74.6236
											90.5541		74.6236
											90.5541		74.6236
											90.5541		74.6236
											90.5541		74.6236
											90.5541		74.6236
											90.5541		74.6236
											90.5541		74.6236
											90.5541		74.6236
											90.5541		74.6236
											90.5541		74.6236
											90.5541		74.6236
											90.5541		74.6236
											90.5541		74.6236
											90.5541		74.6236
											90.5541		74.6236
											90.5541		74.6236
											90.5541		74.6236
											90.5541		74.6236
											90.5541		74.6236
											90.5541		74.6236
											90.5541		74.6236
											90.5541		74.6236
											90.5541		74.6236
											90.5541		74.6236
											90.5541		74.6236
											90.5541		74.6236
											90.5541		74.6236
											90.5541		74.6236
											90.5541		74.6236
											90.5541		74.6236
											90.5541		74.6236
											90.5541		74.6236
											90.5541		74.6236
											90.5541		74.6236
											90.5541		74.6236
											90.5541		74.6236
											90.5541		74.6236
											90.5541		74.6236
											90.5541		74.6236
											90.5541		74.6236
											90.5541		74.6236
											90.5541		74.6236
											90.5541		74.6236
											90.5541		74.6236
											90.5541		74.6236
											89.5726		74.6236
											89.5726		74.6236
											89.5726		74.6236
											89.5726		74.6236
											89.5726		74.6236
											89.5726		74.6236
											89.5726		74.6236
											89.5726		74.6236
											89.5726		74.6236
											89.5726		74.6236
											89.5726		74.6236
											89.5726		74.6236
											89.5726		74.6236
											89.5726		74.6236
											89.5726		74.6236
											89.5726		74.6236
											89.5726		74.6236
											89.5726		74.6236
											89.5726		74.6236
											89.5726		74.6236
											89.5726		74.6236
											89.5726		74.6236
											89.5726		74.6236
											89.5726		74.6236
											89.5726		74.6236
											89.5726		74.6236
											89.5726		74.6236
											89.5726		74.6236
											89.5726		74.6236
											89.5726		72.1918
											89.5726		72.1918
											89.5726		72.1918
											89.5726		72.1918
											89.5726		72.1918
											89.5726		72.1918
											89.5726		72.1918
											89.5726		72.1918
											89.5726		72.1918
											89.5726		72.1918
											83.5093		72.1918
											83.5093		72.1918
											83.5093		72.1918
											83.5093		72.1918
											83.5093		72.1918
											83.5093		72.1918
											83.5093		72.1918
											83.5093		72.1918
											83.5093		72.1918
											83.5093		72.1918
											83.5093		72.1918
											83.5093		72.1918
											83.5093		72.1918
											83.5093		72.1918
											83.5093		72.1918
											83.5093		72.1918
											83.5093		72.1918
											83.5093		72.1918
											83.5093		72.1918
											83.5093		72.1918
											83.5093		72.1918
											83.5093		72.1918
											83.5093		72.1918
											83.5093		72.1918
											83.5093		72.1918
											83.5093		72.1918
											83.5093		72.1918
											83.5093		72.1918
											83.5093		72.1918
											83.5093		72.1918
											83.5093		72.1918
											83.5093		72.1918
											83.5093		72.1918
											83.5093		72.1918
											83.5093		72.1918
											83.5093		72.1918
											83.5093		72.1918
											83.5093		72.1918
											83.5093		72.1918
											83.5093		72.1918
											83.5093		72.1918
											83.5093		72.1918
											83.5093		72.1918
											83.5093		72.1918
											83.5093		72.1918
											83.5093		72.1918
											83.5093		72.1918
											83.5093		72.1918
											83.5093		72.1918
											83.5093		72.1918
											83.5093		72.1918
											83.5093		72.1918
											83.5093		72.1918
											83.5093		72.1918
											83.5093		72.1918
											83.5093		72.1918
											83.5093		72.1918
											83.5093		72.1918
											83.5093		72.1918
											83.5093		72.1918
											83.5093		72.1918
											83.5093		72.1918
											83.5093		72.1918
											83.5093		72.1918
											83.5093		72.1918
											83.5093		72.1918
											83.5093		72.1918
											83.4682		72.1918
											83.4682		72.1918
											83.4682		72.1918
											83.4682		72.1918
											83.4682		72.1918
											83.4682		72.1918
											83.4682		72.1918
											83.4682		72.1918
											83.4682		72.1918
											83.4682		72.1918
											83.4682		72.1918
											83.4682		72.1918
											83.4682		72.1918
											83.4682		72.1918
											83.4682		72.1918
											83.4682		72.1918
											83.4682		72.1918
											83.4682		72.1918
											83.4682		72.1918
											83.4682		72.1918
											83.4682		70.1372
											83.4682		70.1372
											83.4682		70.1372
											83.4682		70.1372
											83.4682		70.1372
											83.4682		70.1372
											83.4682		70.1372
											83.4682		70.1372
											83.4682		70.1372
											83.4682		70.1372
											83.4682		70.1372
											83.4682		70.1372
											83.4682		70.1372
											83.4682		70.1372
											83.4682		70.1372
											83.4682		70.1372
											83.4682		70.1372
											83.4682		70.1372
											83.4682		70.1372
											83.4682		70.1372
											83.4682		70.1372
											83.4682		70.1372
											83.4682		70.1372
											83.4682		70.1372
											83.4682		70.1372
											83.4682		70.1372
											83.4682		70.1372
											83.4682		70.1372
											83.4682		70.1372
											83.4682		70.1372
											83.4682		70.1372
											83.4682		70.1372
											83.4682		70.1372
											83.4682		70.1372
											83.4682		70.1372
											83.4682		70.1372
											83.4682		70.1372
											83.1447		70.1372
											83.1447		70.1372
											83.1447		70.1372
											83.1447		70.1372
											83.1447		70.1372
											83.1447		70.1372
											83.1447		70.1372
											83.1447		70.1372
											83.1447		70.1372
											83.1447		70.1372
											83.1447		70.1372
											83.1447		70.1372
											83.1447		70.1372
											83.1447		70.1372
											83.1447		70.1372
											83.1447		70.1372
											83.1447		70.1372
											83.1447		70.1372
											83.1447		70.1372
											83.1447		70.1372
											83.1447		70.1372
											83.1447		70.1372
											83.1447		70.1372
											83.1447		70.1372
											83.1447		70.1372
											83.1447		70.1372
											83.1447		70.1372
											83.1447		70.1372
											83.1447		70.1372
											83.1447		70.1372
											83.1447		70.1372
											83.1447		70.1372
											83.1447		70.1372
											83.1447		70.1372
											83.1447		70.1372
											83.1447		70.1372
											83.1447		70.1372
											83.1447		70.1372
											83.1447		70.1372
											83.1447		70.1372
											83.1447		70.1372
											83.1447		70.1372
											83.1447		70.1372
											83.1447		70.1372
											83.1447		70.1372
											83.1447		70.1372
											83.1447		70.1372
											83.1447		70.1372
											83.1447		70.1372
											83.1447		70.1372
											83.1447		70.1372
											83.1447		70.1372
											83.1447		70.1372
											83.1447		70.1372
											83.1447		70.1372
											83.1447		70.1372
											83.1447		70.1372
											83.1447		70.1372
											83.1447		70.1372
											83.1447		70.1372
											83.1447		70.1372
											83.1447		70.1372
											83.1447		70.1372
											83.1447		70.1372
											83.1447		70.1372
											83.1447		70.1372
											83.1447		70.1372
											83.1447		70.1372
											83.1447		70.1372
											83.1447		70.1372
											83.1447		70.1372
											83.1447		70.1372
											83.1447		70.1372
											82.9951		70.1372
											82.9951		70.1372
											82.9951		70.1372
											82.9951		70.1372
											82.9951		70.1372
											82.9951		70.1372
											82.9951		70.1372
											82.9951		70.1372
											82.9951		70.1372
											82.9951		70.1372
											82.9951		70.1372
											82.9951		70.1372
											82.9951		70.1372
											82.9951		70.1372
[truncated: 3,501 more rows]
