# Supplementary material for: Differentiation of cisplatin uptake within a population of cancer cells – how to “crack this nut” using single-cell ICP-MS
Source: Royal Society of Chemistry journal article supplement (doi:10.1039/d5an00152h), 2025-01-01
Supplement: d5an00152h2.pdf [file d5an00152h2.pdf]

## Supplementary information

### Differentiation of cisplatin uptake within a population of cancer cells – how to "crack this nut" using single-cell ICP-MS

Zuzanna Szymańska, Magdalena Matczuk\*, Agnieszka Żuchowska, Paweł Romańczuk, Andrei R. Timerbaev and Maciej Jarosz

#### Cisplatin treatment

The MDA-MB-231 cells were seeded at a density of  $5 \cdot 10^5$  cells/mL in Petri dishes. 1 mL of cells' suspension and 2 mL of culture medium (DMEM (BioWEST, Nuaille, France) supplemented with 10% fetal bovine serum, 1% penicillin/streptomycin, and 1% L-Glutamin) was placed in each Petri dish. After 24 h, the culture medium was removed. Subsequently, 1 mL of cisplatin solution was added to each sample at a concentration of 0, 0.5, 1, or 5 ppm. In another batch of samples, 2 mL (instead of 1 mL) of cisplatin solution at a concentration of 1 or 5 ppm was added to several samples. Cisplatin solutions were prepared in a cell culture medium. Cells were incubated for 5 or 24 hours.

**Table S1.** SC-ICP-MS conditions.

| Parameter               | Value                                  |
|-------------------------|----------------------------------------|
| Sample flow rate        | $10 \mu\text{L} \cdot \text{min}^{-1}$ |
| Dwell time              | 100 $\mu\text{s}$                      |
| Sample analysis time    | 60 s                                   |
| Nebulizer gas flow rate | $0.5 \text{ L} \cdot \text{min}^{-1}$  |
| Make-up gas flow rate   | $0.6 \text{ L} \cdot \text{min}^{-1}$  |
| Isotope                 | $^{195}\text{Pt}^+$                    |

#### Calibration

The calibration curve was prepared using 0.5, 1, 5, 10, and 20 ppb ionic Pt solutions in the cell culture medium to matrix match cell samples. The transport efficiency of calibration solutions was determined with 50-nm gold nanoparticles (BBI Solutions, Crumlin, Great Britain). Calibration was performed daily.

Data for Fig. 2, Fig.3, and Fig. 4 was collected with calibration curve  $y = 12334x - 1636.9$ .  $R^2 = 0.9982$ .

#### Transport efficiency

Transport efficiency of calibration solutions reached 69%.
